# Supplementary material for: First Survey of the Wheat Chromosome 5A Composition through a Next Generation Sequencing Approach
Source: PLoS One. 2011 Oct 18;6(10):e26421. doi: 10.1371/journal.pone.0026421 (PMC3196578; doi:10.1371/journal.pone.0026421)
Supplement: Table S3 — Complete list Unigenes mapped on 5A. (XLSX) [file pone.0026421.s004.xlsx]

## Sheet: 5AS
First Survey of the Wheat Chromosome 5A Composition through a Next Generation Sequencing Approach (Vitulo et al).
Supplementary Table 3: Unigenes mapped on 5AS. Asterisks to show gaps (ie: regions not contiguously covered by contigs ) in the unigenes. Unigenes showing multiple matches on same positions by different contigs were removed. Parameters: identity ≥ 97%, coverage ≥ 50 consecutive bases.
contigs (n)	Unigene	contig identifier	identity	region covered on unigene			region covered on contig			e-value
2	gnl|UG|Ta#S12884462	21948	0.98	229	-	350	339	-	216	9e-05
	gnl|UG|Ta#S12884462	107053	1	347	-	536	14	-	203	2e-09
2	gnl|UG|Ta#S12889266	63056	1	17	*	89	55	-	127	0.003
	gnl|UG|Ta#S12889266	15020	0.98	285	*	361	543	-	467	0.008
2	gnl|UG|Ta#S12891432	64284	0.97	229	-	552	543	-	221	7e-15
	gnl|UG|Ta#S12891432	47948	0.97	553	-	667	904	-	790	1e-05
2	gnl|UG|Ta#S12907057	29084	1	59	*	372	1	-	314	4e-16
	gnl|UG|Ta#S12907057	87277	0.98	447	*	508	935	-	874	0.06
3	gnl|UG|Ta#S12921368	81553	0.98	8	-	156	180	-	32	6e-07
	gnl|UG|Ta#S12921368	24370	0.99	151	-	270	596	-	476	2e-05
	gnl|UG|Ta#S12921368	3511	1	267	-	392	144	-	269	2e-06
	gnl|UG|Ta#S12921368	3511	1	390	-	502	1020	-	1132	3e-05
	gnl|UG|Ta#S12921368	3511	1	503	-	580	1220	-	1297	0.008
	gnl|UG|Ta#S12921368	3511	0.98	580	-	658	1393	-	1471	0.001
2	gnl|UG|Ta#S12922439	18538	1	1	-	60	238	-	297	0.07
	gnl|UG|Ta#S12922439	26549	0.98	59	-	156	705	-	608	0.0002
3	gnl|UG|Ta#S12922475	85216	1	1	-	113	539	-	427	2e-05
	gnl|UG|Ta#S12922475	89649	1	109	-	239	399	-	529	2e-06
	gnl|UG|Ta#S12922475	18546	1	240	-	441	521	-	722	8e-10
2	gnl|UG|Ta#S12922901	11790	0.97	184	*	271	204	-	117	0.005
	gnl|UG|Ta#S12922901	23541	1	438	*	532	710	-	804	0.0003
	gnl|UG|Ta#S12922901	23541	0.97	533	-	636	934	-	1036	0.0001
4	gnl|UG|Ta#S12922906	76473	0.98	1	-	56	489	-	434	0.09
	gnl|UG|Ta#S12922906	76473	0.98	56	-	120	319	-	255	0.09
	gnl|UG|Ta#S12922906	76473	1	115	*	227	161	-	49	4e-05
	gnl|UG|Ta#S12922906	76474	1	283	*	346	64	-	1	0.07
	gnl|UG|Ta#S12922906	2819	1	589	*	686	1	-	98	0.0008
	gnl|UG|Ta#S12922906	2819	1	684	*	739	210	-	265	0.02
	gnl|UG|Ta#S12922906	15926	0.99	960	*	1232	273	-	1	9e-14
	gnl|UG|Ta#S12922906	27394	1	1253	*	1328	1037	-	962	0.001
3	gnl|UG|Ta#S12923206	75597	0.98	558	-	615	614	-	557	0.06
	gnl|UG|Ta#S12923206	75597	1	606	*	682	384	-	308	0.003
	gnl|UG|Ta#S12923206	90046	1	775	*	1001	148	-	374	1e-11
	gnl|UG|Ta#S12923206	108941	1	1002	-	1103	102	-	1	0.0004
2	gnl|UG|Ta#S12923275	119018	1	572	-	628	779	-	723	0.06
	gnl|UG|Ta#S12923275	119018	1	626	-	823	584	-	387	3e-10
	gnl|UG|Ta#S12923275	119018	0.99	821	-	1113	298	-	5	2e-15
	gnl|UG|Ta#S12923275	28305	1	1110	-	1298	162	-	350	3e-09
5	gnl|UG|Ta#S12933471	14392	0.99	2	*	194	755	-	946	3e-09
	gnl|UG|Ta#S12933471	91699	1	267	*	673	407	-	1	00:00:00
	gnl|UG|Ta#S12933471	91700	1	791	*	853	63	-	1	0.04
	gnl|UG|Ta#S12933471	92292	1	854	*	1204	351	-	1	00:00:00
	gnl|UG|Ta#S12933471	23255	0.99	1337	*	1965	1	-	628	00:00:00
2	gnl|UG|Ta#S12933892	18073	0.99	2	*	379	42	-	419	00:00:00
	gnl|UG|Ta#S12933892	19465	0.98	418	*	602	1537	-	1354	6e-09
2	gnl|UG|Ta#S12934907	131576	0.97	131	-	240	1	-	110	0.0006
	gnl|UG|Ta#S12934907	211338	0.98	242	-	303	1	-	62	0.01
2	gnl|UG|Ta#S12947618	23080	0.98	1	*	63	1384	-	1447	0.05
	gnl|UG|Ta#S12947618	12749	0.99	95	*	369	1	-	274	3e-14
	gnl|UG|Ta#S12947618	12749	1	363	-	569	365	-	571	1e-10
2	gnl|UG|Ta#S12955787	79395	0.98	262	-	347	1665	-	1750	0.009
	gnl|UG|Ta#S12955787	79711	0.98	343	*	418	552	-	627	0.003
	gnl|UG|Ta#S12955787	79711	0.98	343	*	418	552	-	627	0.003
3	gnl|UG|Ta#S12958178	99602	0.97	18	-	168	907	-	755	1e-07
	gnl|UG|Ta#S12958178	99602	1	166	-	336	555	-	385	9e-08
	gnl|UG|Ta#S12958178	25393	0.98	337	-	419	233	-	314	0.001
	gnl|UG|Ta#S12958178	93718	0.98	413	-	599	530	-	343	3e-09
2	gnl|UG|Ta#S12960386	108455	0.98	177	*	234	58	-	1	0.02
	gnl|UG|Ta#S12960386	214863	0.97	276	*	404	20	-	148	1e-05
3	gnl|UG|Ta#S12963043	72829	0.99	1	-	226	9	-	235	1e-11
	gnl|UG|Ta#S12963043	72826	0.98	225	-	288	390	-	453	0.02
	gnl|UG|Ta#S12963043	72826	0.98	283	-	376	1006	-	1099	0.0003
	gnl|UG|Ta#S12963043	72826	1	371	-	508	1279	-	1416	2e-06
	gnl|UG|Ta#S12963043	82507	1	507	-	680	846	-	673	2e-08
2	gnl|UG|Ta#S12972471	14691	0.99	12	*	126	116	-	1	6e-05
	gnl|UG|Ta#S12972471	24313	1	369	*	555	2595	-	2409	1e-09
	gnl|UG|Ta#S12972471	24313	1	369	*	555	2595	-	2409	1e-09
2	gnl|UG|Ta#S12973362	76816	1	157	-	211	55	-	1	0.03
	gnl|UG|Ta#S12973362	12293	1	212	-	582	371	-	1	00:00:00
3	gnl|UG|Ta#S12980836	173001	0.98	12	*	233	225	-	3	5e-11
	gnl|UG|Ta#S12980836	23847	1	300	*	382	324	-	242	0.001
	gnl|UG|Ta#S12980836	23847	1	380	*	530	151	-	1	2e-07
	gnl|UG|Ta#S12980836	81111	1	551	*	655	778	-	882	6e-05
	gnl|UG|Ta#S12980836	81111	0.98	653	-	739	1409	-	1494	0.001
2	gnl|UG|Ta#S12991537	70120	0.98	20	-	95	77	-	1	0.003
	gnl|UG|Ta#S12991537	70424	0.97	96	-	650	1	-	547	00:00:00
2	gnl|UG|Ta#S12996518	20266	1	16	*	128	287	-	399	2e-05
	gnl|UG|Ta#S12996518	123859	1	370	*	555	98	-	283	4e-09
3	gnl|UG|Ta#S13020825	164696	1	14	-	132	119	-	1	6e-05
	gnl|UG|Ta#S13020825	97752	1	133	-	267	138	-	4	7e-06
	gnl|UG|Ta#S13020825	58046	1	271	-	441	604	-	434	7e-08
2	gnl|UG|Ta#S13031267	99187	0.97	1	-	186	35	-	221	1e-08
	gnl|UG|Ta#S13031267	17990	0.98	185	-	360	255	-	430	2e-08
2	gnl|UG|Ta#S13056347	81320	0.97	385	-	525	183	-	43	5e-06
	gnl|UG|Ta#S13056347	20580	0.98	524	-	712	559	-	371	1e-09
2	gnl|UG|Ta#S13127241	178663	0.98	41	*	119	65	-	143	0.005
	gnl|UG|Ta#S13127241	40121	0.98	154	*	211	3	-	60	0.03
2	gnl|UG|Ta#S13166085	26577	1	8	-	110	1	-	103	4e-05
	gnl|UG|Ta#S13166085	96391	0.98	111	-	358	595	-	348	9e-12
2	gnl|UG|Ta#S13212796	174575	0.97	1	*	67	170	-	236	0.01
	gnl|UG|Ta#S13212796	171644	0.98	137	*	248	9	-	119	4e-05
2	gnl|UG|Ta#S13266955	105481	0.99	9	-	229	16	-	235	2e-11
	gnl|UG|Ta#S13266955	105480	0.98	230	-	518	1	-	288	7e-14
2	gnl|UG|Ta#S15880990	23320	0.98	20	*	411	392	-	1	00:00:00
	gnl|UG|Ta#S15880990	78668	0.97	562	*	708	978	-	832	2e-06
3	gnl|UG|Ta#S15881534	5783	1	20	-	382	363	-	1	00:00:00
	gnl|UG|Ta#S15881534	106862	1	383	-	547	165	-	1	3e-08
	gnl|UG|Ta#S15881534	15947	1	548	-	741	1	-	194	2e-10
2	gnl|UG|Ta#S16057818	76531	0.99	51	-	209	453	-	295	4e-07
	gnl|UG|Ta#S16057818	70882	0.97	208	-	280	2832	-	2760	0.01
	gnl|UG|Ta#S16057818	70882	0.98	280	-	445	2551	-	2386	1e-07
3	gnl|UG|Ta#S16057891	15537	0.97	8	-	115	126	-	233	0.0002
	gnl|UG|Ta#S16057891	15537	1	113	-	168	476	-	531	0.01
	gnl|UG|Ta#S16057891	27818	0.99	170	-	274	207	-	311	0.0003
	gnl|UG|Ta#S16057891	78000	0.98	272	-	691	896	-	476	00:00:00
3	gnl|UG|Ta#S16057904	84160	0.98	267	*	429	1	-	166	3e-07
	gnl|UG|Ta#S16057904	29495	1	465	*	595	634	-	764	8e-06
	gnl|UG|Ta#S16057904	13313	0.99	720	*	940	1	-	220	1e-11
3	gnl|UG|Ta#S16057906	5777	1	8	-	278	2016	-	2286	4e-14
	gnl|UG|Ta#S16057906	5777	0.99	275	*	647	2374	-	2747	00:00:00
	gnl|UG|Ta#S16057906	92006	1	736	*	904	169	-	1	2e-08
	gnl|UG|Ta#S16057906	92005	1	905	-	1017	1	-	113	3e-05
5	gnl|UG|Ta#S16058097	96594	0.98	8	-	60	435	-	487	0.03
	gnl|UG|Ta#S16058097	96595	1	54	*	192	184	-	46	1e-06
	gnl|UG|Ta#S16058097	89656	1	210	*	348	427	-	289	1e-06
	gnl|UG|Ta#S16058097	26246	0.99	346	*	491	446	-	302	3e-07
	gnl|UG|Ta#S16058097	7199	0.98	703	*	794	855	-	763	0.0007
	gnl|UG|Ta#S16058097	7199	0.99	794	-	1142	658	-	310	00:00:00
3	gnl|UG|Ta#S16058146	16311	0.99	8	-	551	544	-	1	00:00:00
	gnl|UG|Ta#S16058146	41333	0.99	552	*	1084	533	-	1	00:00:00
	gnl|UG|Ta#S16058146	94582	0.98	1665	*	1752	1	-	88	0.002
	gnl|UG|Ta#S16058146	94582	0.98	1665	*	1752	1	-	88	0.002
4	gnl|UG|Ta#S16058184	8513	1	226	*	376	256	-	106	4e-07
	gnl|UG|Ta#S16058184	81361	1	396	*	523	128	-	1	2e-06
	gnl|UG|Ta#S16058184	104952	0.98	528	*	656	155	-	284	1e-06
	gnl|UG|Ta#S16058184	81362	0.98	928	*	1192	97	-	361	7e-13
	gnl|UG|Ta#S16058184	81362	1	1190	-	1253	616	-	679	0.08
2	gnl|UG|Ta#S16058373	13693	0.98	9	-	172	112	-	275	2e-07
	gnl|UG|Ta#S16058373	13693	0.98	169	*	286	1474	-	1591	2e-05
	gnl|UG|Ta#S16058373	73730	0.98	591	*	642	4260	-	4209	0.2
	gnl|UG|Ta#S16058373	73730	0.97	641	-	759	4126	-	4008	2e-05
	gnl|UG|Ta#S16058373	73730	0.98	758	-	839	3485	-	3404	0.003
	gnl|UG|Ta#S16058373	73730	0.99	838	-	937	3012	-	2913	0.0003
	gnl|UG|Ta#S16058373	73730	0.97	935	-	1037	2836	-	2734	0.0002
	gnl|UG|Ta#S16058373	73730	0.98	1038	-	1155	2650	-	2533	2e-05
	gnl|UG|Ta#S16058373	73730	0.98	1153	-	1273	2428	-	2308	3e-05
2	gnl|UG|Ta#S16058503	8652	0.97	655	*	740	157	-	71	0.002
	gnl|UG|Ta#S16058503	13599	1	797	*	1014	1148	-	931	3e-11
	gnl|UG|Ta#S16058503	13599	0.99	1012	-	1145	574	-	441	7e-06
	gnl|UG|Ta#S16058503	13599	0.98	1144	-	1321	363	-	186	1e-08
	gnl|UG|Ta#S16058503	13599	1	1318	-	1426	109	-	1	1e-05
2	gnl|UG|Ta#S16176000	119692	1	838	-	998	88	-	248	9e-08
	gnl|UG|Ta#S16176000	96485	1	996	-	1253	258	-	1	1e-13
2	gnl|UG|Ta#S16193306	83559	0.99	244	-	487	244	-	1	6e-12
	gnl|UG|Ta#S16193306	83558	0.98	488	-	628	1035	-	894	1e-06
3	gnl|UG|Ta#S16195021	179189	0.98	1	-	92	17	-	108	0.0004
	gnl|UG|Ta#S16195021	179190	1	93	-	295	1	-	203	2e-10
	gnl|UG|Ta#S16195021	128391	0.98	298	-	413	1	-	116	9e-05
2	gnl|UG|Ta#S16206641	87373	0.99	1	-	308	783	-	1090	2e-16
	gnl|UG|Ta#S16206641	15443	0.98	314	-	753	483	-	44	00:00:00
2	gnl|UG|Ta#S16214441	85122	0.97	1	-	202	668	-	467	1e-09
	gnl|UG|Ta#S16214441	11789	0.98	197	-	680	514	-	997	00:00:00
2	gnl|UG|Ta#S16223176	7164	1	10	*	125	192	-	77	3e-05
	gnl|UG|Ta#S16223176	75046	1	150	*	423	588	-	861	5e-14
2	gnl|UG|Ta#S16226589	35948	1	1	*	109	109	-	1	4e-05
	gnl|UG|Ta#S16226589	45297	0.97	192	*	291	1048	-	948	0.0004
	gnl|UG|Ta#S16226589	45297	0.97	291	-	759	690	-	221	00:00:00
2	gnl|UG|Ta#S16255412	95910	1	222	*	281	12	-	71	0.06
	gnl|UG|Ta#S16255412	20983	1	414	*	527	570	-	457	6e-05
	gnl|UG|Ta#S16255412	20983	1	527	-	635	109	-	1	4e-05
2	gnl|UG|Ta#S16257717	13605	1	18	*	90	291	-	363	0.003
	gnl|UG|Ta#S16257717	4249	0.99	293	*	542	1	-	250	2e-12
3	gnl|UG|Ta#S16266580	102933	1	1	-	189	484	-	672	1e-09
	gnl|UG|Ta#S16266580	25466	0.99	185	-	624	801	-	361	00:00:00
	gnl|UG|Ta#S16266580	67546	0.97	619	-	707	511	-	600	0.003
3	gnl|UG|Ta#S16526200	28454	1	544	*	623	1	-	80	0.001
	gnl|UG|Ta#S16526200	9429	0.98	786	*	856	206	-	136	0.005
	gnl|UG|Ta#S16526200	25403	0.99	856	-	979	988	-	865	2e-05
	gnl|UG|Ta#S16526200	25403	0.98	976	-	1118	657	-	515	2e-06
	gnl|UG|Ta#S16526200	25403	0.98	1116	-	1311	420	-	225	8e-09
	gnl|UG|Ta#S16526200	25403	0.99	1310	-	1435	126	-	1	1e-06
2	gnl|UG|Ta#S17536983	74814	1	1	*	53	217	-	269	0.02
	gnl|UG|Ta#S17536983	74815	0.97	156	*	294	522	-	384	3e-06
2	gnl|UG|Ta#S17879024	3910	0.97	164	*	253	122	-	33	0.003
	gnl|UG|Ta#S17879024	90791	0.99	335	*	444	398	-	289	6e-05
	gnl|UG|Ta#S17879024	90791	0.99	335	*	444	398	-	289	6e-05
3	gnl|UG|Ta#S17888135	22649	0.98	14	-	257	575	-	818	5e-12
	gnl|UG|Ta#S17888135	22649	0.99	258	-	357	927	-	1026	0.0002
	gnl|UG|Ta#S17888135	95390	1	357	-	410	184	-	237	0.02
	gnl|UG|Ta#S17888135	95390	0.98	409	-	893	389	-	873	00:00:00
3	gnl|UG|Ta#S17888278	6100	1	59	-	169	193	-	83	4e-05
	gnl|UG|Ta#S17888278	162063	1	171	*	335	165	-	1	4e-08
	gnl|UG|Ta#S17888278	8410	0.99	350	*	493	632	-	490	3e-07
	gnl|UG|Ta#S17888278	8410	1	493	-	615	358	-	236	9e-06
	gnl|UG|Ta#S17888278	8410	1	612	-	714	157	-	55	0.0001
2	gnl|UG|Ta#S17888666	80240	0.98	313	*	381	71	-	3	0.04
	gnl|UG|Ta#S17888666	80245	0.97	647	*	854	535	-	328	1e-09
2	gnl|UG|Ta#S17888759	75599	0.98	150	*	244	517	-	611	0.0002
	gnl|UG|Ta#S17888759	101023	1	317	*	396	338	-	417	0.007
2	gnl|UG|Ta#S17889075	83382	0.98	210	-	391	16	-	197	1e-08
	gnl|UG|Ta#S17889075	6579	0.98	389	-	905	557	-	1073	00:00:00
3	gnl|UG|Ta#S17889234	18275	1	13	*	142	138	-	267	1e-06
	gnl|UG|Ta#S17889234	103601	1	159	*	265	107	-	1	6e-05
	gnl|UG|Ta#S17889234	14553	0.99	421	*	765	197	-	543	00:00:00
3	gnl|UG|Ta#S17889682	78799	0.99	54	-	157	135	-	32	0.0002
	gnl|UG|Ta#S17889682	28496	1	152	-	204	148	-	200	0.07
	gnl|UG|Ta#S17889682	78797	1	205	-	283	1	-	79	0.003
3	gnl|UG|Ta#S17890531	26122	0.97	14	-	131	472	-	589	5e-05
	gnl|UG|Ta#S17890531	26122	0.98	128	*	502	806	-	1180	00:00:00
	gnl|UG|Ta#S17890531	9064	0.97	572	*	698	978	-	851	1e-05
2	gnl|UG|Ta#S17890866	90177	0.99	211	*	443	235	-	1	4e-11
	gnl|UG|Ta#S17890866	17019	0.99	571	*	756	79	-	264	4e-09
	gnl|UG|Ta#S17890866	17019	0.99	571	*	756	79	-	264	4e-09
3	gnl|UG|Ta#S17890886	77737	0.98	6	-	126	260	-	140	2e-05
	gnl|UG|Ta#S17890886	77739	1	123	-	456	334	-	1	4e-17
	gnl|UG|Ta#S17890886	77740	0.99	457	-	827	1009	-	639	00:00:00
2	gnl|UG|Ta#S17893543	64884	1	79	-	585	507	-	1	00:00:00
	gnl|UG|Ta#S17893543	114207	0.99	586	-	776	845	-	656	2e-09
2	gnl|UG|Ta#S17893851	85180	0.98	107	*	180	154	-	82	0.003
	gnl|UG|Ta#S17893851	85181	1	237	*	376	231	-	92	3e-07
2	gnl|UG|Ta#S17894023	108698	0.97	482	*	579	427	-	523	0.0005
	gnl|UG|Ta#S17894023	97454	0.97	612	*	691	1	-	80	0.002
3	gnl|UG|Ta#S17894090	77472	0.97	76	*	151	1296	-	1372	0.002
	gnl|UG|Ta#S17894090	21616	1	178	*	266	290	-	202	0.0007
	gnl|UG|Ta#S17894090	70227	1	265	-	367	586	-	484	0.0001
	gnl|UG|Ta#S17894090	70227	1	364	-	674	407	-	97	3e-16
4	gnl|UG|Ta#S17895397	103405	0.99	242	*	409	1	-	168	4e-08
	gnl|UG|Ta#S17895397	103404	0.99	484	*	604	250	-	130	6e-05
	gnl|UG|Ta#S17895397	103406	0.98	677	*	731	212	-	158	0.03
	gnl|UG|Ta#S17895397	25753	1	838	*	902	638	-	574	0.02
2	gnl|UG|Ta#S17896317	8151	0.97	146	*	218	1514	-	1442	0.009
	gnl|UG|Ta#S17896317	12679	1	355	*	411	290	-	346	0.03
3	gnl|UG|Ta#S17896657	41709	1	87	*	137	643	-	593	0.01
	gnl|UG|Ta#S17896657	41709	0.98	114	*	429	576	-	258	6e-16
	gnl|UG|Ta#S17896657	20202	1	423	-	625	298	-	96	3e-10
3	gnl|UG|Ta#S17897418	98732	0.98	489	-	579	1074	-	1164	0.0003
	gnl|UG|Ta#S17897418	83486	0.98	576	*	628	39	-	91	0.04
	gnl|UG|Ta#S17897418	179033	1	825	*	904	5	-	84	0.007
2	gnl|UG|Ta#S17898726	11465	0.98	291	-	403	81	-	193	7e-05
	gnl|UG|Ta#S17898726	11465	0.98	401	*	472	276	-	347	0.009
	gnl|UG|Ta#S17898726	12909	0.98	716	*	869	285	-	437	2e-07
3	gnl|UG|Ta#S17972466	100228	1	112	-	205	120	-	213	0.0008
	gnl|UG|Ta#S17972466	100228	1	203	-	300	292	-	389	0.0005
	gnl|UG|Ta#S17972466	26972	1	301	*	554	1	-	254	9e-13
	gnl|UG|Ta#S17972466	27579	1	582	*	644	392	-	330	0.01
3	gnl|UG|Ta#S17975080	75842	1	113	-	346	285	-	518	1e-12
	gnl|UG|Ta#S17975080	75844	1	346	-	505	171	-	12	2e-08
	gnl|UG|Ta#S17975080	75845	0.98	504	-	692	368	-	179	1e-09
3	gnl|UG|Ta#S17977355	22086	1	113	-	303	50	-	240	1e-09
	gnl|UG|Ta#S17977355	72051	1	301	-	426	35	-	160	1e-06
	gnl|UG|Ta#S17977355	21004	0.98	423	-	652	240	-	466	3e-11
2	gnl|UG|Ta#S17978828	25134	0.97	112	*	437	386	-	62	7e-16
	gnl|UG|Ta#S17978828	25134	0.97	112	*	437	386	-	62	7e-16
	gnl|UG|Ta#S17978828	1499	0.97	436	-	560	125	-	1	5e-05
2	gnl|UG|Ta#S17984306	9021	0.98	65	*	219	696	-	542	8e-07
	gnl|UG|Ta#S17984306	9021	1	313	*	468	194	-	39	4e-07
	gnl|UG|Ta#S17984306	75494	1	467	-	565	261	-	359	0.0002
	gnl|UG|Ta#S17984306	75494	0.97	563	-	687	441	-	565	6e-05
2	gnl|UG|Ta#S17984407	28250	0.99	23	*	532	62	-	571	00:00:00
	gnl|UG|Ta#S17984407	169447	0.98	654	*	794	142	-	3	7e-06
2	gnl|UG|Ta#S17984480	60697	0.98	184	*	297	1	-	114	2e-05
	gnl|UG|Ta#S17984480	76030	0.99	352	*	543	1	-	193	2e-09
2	gnl|UG|Ta#S17984525	28388	0.99	20	-	341	1373	-	1693	7e-16
	gnl|UG|Ta#S17984525	28388	1	336	-	441	1763	-	1868	2e-05
	gnl|UG|Ta#S17984525	28388	1	439	*	561	1940	-	2062	8e-06
	gnl|UG|Ta#S17984525	1194	0.98	689	*	847	181	-	23	5e-07
2	gnl|UG|Ta#S17985467	83560	0.97	8	-	153	1328	-	1182	2e-06
	gnl|UG|Ta#S17985467	83560	0.99	151	-	315	809	-	645	2e-08
	gnl|UG|Ta#S17985467	79711	1	316	*	384	1603	-	1535	0.009
	gnl|UG|Ta#S17985467	79711	1	385	*	485	1438	-	1338	0.0001
	gnl|UG|Ta#S17985467	79711	0.99	483	*	651	1244	-	1076	1e-08
2	gnl|UG|Ta#S17985834	14726	0.98	15	*	186	172	-	1	3e-08
	gnl|UG|Ta#S17985834	1833	0.98	363	*	880	518	-	1	00:00:00
3	gnl|UG|Ta#S17986129	96541	0.97	124	*	225	235	-	133	0.0004
	gnl|UG|Ta#S17986129	16241	0.97	258	*	383	471	-	346	2e-05
	gnl|UG|Ta#S17986129	16241	0.98	382	*	637	256	-	1	5e-12
	gnl|UG|Ta#S17986129	96540	1	715	*	774	53	-	112	0.09
2	gnl|UG|Ta#S17988667	10097	0.98	84	-	390	307	-	1	2e-15
	gnl|UG|Ta#S17988667	10096	0.97	391	-	660	878	-	609	4e-12
2	gnl|UG|Ta#S17988691	78330	0.98	86	-	472	746	-	360	00:00:00
	gnl|UG|Ta#S17988691	78330	1	471	-	544	280	-	207	0.002
	gnl|UG|Ta#S17988691	78329	0.97	545	*	726	265	-	446	7e-08
	gnl|UG|Ta#S17988691	78329	0.98	817	*	889	689	-	762	0.003
2	gnl|UG|Ta#S17988750	111588	0.97	92	*	165	220	-	147	0.003
	gnl|UG|Ta#S17988750	23527	0.97	251	*	623	1	-	370	00:00:00
2	gnl|UG|Ta#S17988952	10276	0.98	158	*	276	383	-	265	3e-05
	gnl|UG|Ta#S17988952	85701	0.98	366	*	533	87	-	254	8e-08
	gnl|UG|Ta#S17988952	85701	0.99	531	-	653	747	-	869	4e-05
	gnl|UG|Ta#S17988952	85701	1	652	-	737	946	-	1031	0.0003
	gnl|UG|Ta#S17988952	85701	0.97	738	-	856	1164	-	1283	1e-05
2	gnl|UG|Ta#S17989005	71612	0.98	18	*	106	1942	-	2030	0.0003
	gnl|UG|Ta#S17989005	20474	0.98	333	*	441	1	-	110	0.0001
	gnl|UG|Ta#S17989005	20474	1	433	-	528	327	-	422	0.0009
4	gnl|UG|Ta#S17989179	80901	0.97	32	-	345	480	-	794	3e-15
	gnl|UG|Ta#S17989179	12685	1	341	-	404	191	-	254	0.05
	gnl|UG|Ta#S17989179	12685	1	402	*	615	333	-	546	2e-11
	gnl|UG|Ta#S17989179	7744	0.97	628	*	854	1	-	224	1e-10
2	gnl|UG|Ta#S17989305	21146	0.99	6	-	437	923	-	1354	00:00:00
	gnl|UG|Ta#S17989305	94636	1	446	-	680	1	-	235	5e-12
2	gnl|UG|Ta#S17989325	17065	0.98	69	-	174	2025	-	2130	0.0005
	gnl|UG|Ta#S17989325	17065	0.98	170	-	232	2242	-	2304	0.09
	gnl|UG|Ta#S17989325	6753	0.99	231	-	344	114	-	1	4e-05
2	gnl|UG|Ta#S17989589	83057	0.99	346	-	539	1	-	195	1e-09
	gnl|UG|Ta#S17989589	83055	1	539	-	668	138	-	267	1e-06
2	gnl|UG|Ta#S17989765	81600	0.98	336	-	432	19	-	115	0.0001
	gnl|UG|Ta#S17989765	81600	0.99	424	-	596	276	-	449	7e-08
	gnl|UG|Ta#S17989765	19573	0.99	597	-	805	270	-	62	6e-10
2	gnl|UG|Ta#S17989849	28545	0.98	350	-	487	10	-	147	7e-06
	gnl|UG|Ta#S17989849	28545	0.99	486	-	587	228	-	329	0.0002
	gnl|UG|Ta#S17989849	107162	1	583	-	703	159	-	39	1e-05
2	gnl|UG|Ta#S18006668	16825	1	393	-	465	377	-	449	0.005
	gnl|UG|Ta#S18006668	89837	0.99	466	-	619	155	-	1	2e-07
2	gnl|UG|Ta#S18007865	28031	1	392	-	531	223	-	84	3e-07
	gnl|UG|Ta#S18007865	106022	1	528	-	636	109	-	1	5e-05
2	gnl|UG|Ta#S18009239	228496	0.98	240	-	307	1	-	68	0.01
	gnl|UG|Ta#S18009239	147645	0.98	300	-	359	63	-	4	0.04
2	gnl|UG|Ta#S18011422	3806	0.99	37	*	279	1261	-	1503	3e-12
	gnl|UG|Ta#S18011422	4111	1	429	*	531	176	-	278	0.0001
2	gnl|UG|Ta#S18012651	29453	0.99	53	-	333	575	-	856	6e-14
	gnl|UG|Ta#S18012651	16450	1	332	-	388	381	-	437	0.04
	gnl|UG|Ta#S18012651	16450	1	386	-	474	518	-	606	0.0006
	gnl|UG|Ta#S18012651	16450	1	469	-	555	1111	-	1197	0.0008
	gnl|UG|Ta#S18012651	16450	1	554	-	668	1292	-	1406	2e-05
3	gnl|UG|Ta#S19223846	68234	0.98	13	-	350	4543	-	4206	8e-17
	gnl|UG|Ta#S19223846	68234	0.98	349	-	544	4101	-	3906	2e-09
	gnl|UG|Ta#S19223846	68233	0.98	542	-	779	2693	-	2930	3e-11
2	gnl|UG|Ta#S19224323	94582	0.99	4	*	312	904	-	1211	2e-16
	gnl|UG|Ta#S19224323	94582	0.99	4	*	312	904	-	1211	2e-16
	gnl|UG|Ta#S19224323	93672	1	744	*	801	500	-	443	0.08
6	gnl|UG|Ta#S21502741	91308	0.97	1	-	179	767	-	589	4e-08
	gnl|UG|Ta#S21502741	91308	1	177	-	273	98	-	2	0.0003
	gnl|UG|Ta#S21502741	10329	1	270	-	379	7	-	116	2e-05
	gnl|UG|Ta#S21502741	10329	1	375	*	461	298	-	384	0.0001
	gnl|UG|Ta#S21502741	11124	1	599	*	666	484	-	417	0.004
	gnl|UG|Ta#S21502741	11124	1	663	-	731	237	-	169	0.001
	gnl|UG|Ta#S21502741	8748	1	729	*	785	624	-	680	0.06
	gnl|UG|Ta#S21502741	19166	1	833	*	887	413	-	359	0.07
	gnl|UG|Ta#S21502741	3292	0.99	975	*	1461	1	-	488	00:00:00
2	gnl|UG|Ta#S22365381	17019	0.97	163	*	348	79	-	264	3e-08
	gnl|UG|Ta#S22365381	17019	0.97	163	*	348	79	-	264	3e-08
	gnl|UG|Ta#S22365381	17019	0.98	348	*	501	587	-	741	8e-07
	gnl|UG|Ta#S22365381	17019	0.98	348	*	501	587	-	741	8e-07
	gnl|UG|Ta#S22365381	90176	0.98	563	*	672	1	-	110	2e-05
	gnl|UG|Ta#S22365381	90176	0.97	670	-	821	209	-	360	2e-07
2	gnl|UG|Ta#S22368090	7169	0.98	109	-	193	148	-	232	0.004
	gnl|UG|Ta#S22368090	7169	1	194	-	254	317	-	377	0.02
	gnl|UG|Ta#S22368090	7169	1	250	*	348	606	-	704	0.0001
	gnl|UG|Ta#S22368090	11627	0.98	561	*	700	412	-	273	5e-06
2	gnl|UG|Ta#S22373662	10607	1	380	-	436	98	-	154	0.03
	gnl|UG|Ta#S22373662	10607	1	435	-	493	234	-	292	0.02
	gnl|UG|Ta#S22373662	10607	0.98	494	*	571	421	-	498	0.003
	gnl|UG|Ta#S22373662	14644	0.99	643	*	823	668	-	488	2e-09
3	gnl|UG|Ta#S22378027	88886	0.97	293	-	390	640	-	543	0.0001
	gnl|UG|Ta#S22378027	8961	0.98	385	-	488	205	-	102	0.0005
	gnl|UG|Ta#S22378027	65939	0.99	485	-	592	308	-	202	3e-05
2	gnl|UG|Ta#S22379597	51794	0.97	138	*	276	139	-	1	1e-06
	gnl|UG|Ta#S22379597	1782	0.97	309	*	801	713	-	220	00:00:00
3	gnl|UG|Ta#S22379863	75207	0.99	108	*	265	180	-	336	4e-07
	gnl|UG|Ta#S22379863	83807	0.97	344	*	480	1	-	140	3e-06
	gnl|UG|Ta#S22379863	19260	1	478	-	639	162	-	1	1e-08
2	gnl|UG|Ta#S22380586	23093	1	108	*	187	80	-	1	0.005
	gnl|UG|Ta#S22380586	70812	0.99	523	*	694	653	-	482	5e-08
3	gnl|UG|Ta#S22381510	86969	1	110	-	242	133	-	1	2e-06
	gnl|UG|Ta#S22381510	86967	1	240	-	327	157	-	70	0.0002
	gnl|UG|Ta#S22381510	86970	0.98	326	-	531	67	-	272	2e-10
	gnl|UG|Ta#S22381510	86970	0.99	529	-	633	345	-	449	0.0003
2	gnl|UG|Ta#S22388396	77625	0.99	101	*	304	204	-	1	3e-10
	gnl|UG|Ta#S22388396	14847	0.98	540	*	668	546	-	417	6e-06
2	gnl|UG|Ta#S22388791	27760	0.98	109	-	386	176	-	452	3e-13
	gnl|UG|Ta#S22388791	9492	1	385	-	457	505	-	433	0.004
	gnl|UG|Ta#S22388791	9492	0.97	454	-	552	213	-	115	0.0003
2	gnl|UG|Ta#S22388935	89634	1	90	-	160	71	-	1	0.005
	gnl|UG|Ta#S22388935	29016	0.98	164	-	836	127	-	801	00:00:00
2	gnl|UG|Ta#S22390011	25517	0.98	177	*	329	491	-	642	5e-07
	gnl|UG|Ta#S22390011	12767	0.98	353	*	444	329	-	238	0.0006
2	gnl|UG|Ta#S22390834	86813	0.98	90	*	232	805	-	947	1e-06
	gnl|UG|Ta#S22390834	86813	0.98	90	*	232	805	-	947	1e-06
	gnl|UG|Ta#S22390834	17704	0.99	354	*	688	336	-	1	9e-17
3	gnl|UG|Ta#S22944971	11332	1	320	-	377	1	-	58	0.01
	gnl|UG|Ta#S22944971	214247	0.98	374	*	425	262	-	211	0.1
	gnl|UG|Ta#S22944971	93035	0.98	445	*	516	116	-	45	0.008
2	gnl|UG|Ta#S24318186	7476	1	1	-	552	13	-	564	00:00:00
	gnl|UG|Ta#S24318186	7476	1	549	*	633	655	-	739	0.002
	gnl|UG|Ta#S24318186	12414	1	1135	*	1869	1375	-	641	00:00:00
3	gnl|UG|Ta#S24513576	79172	1	81	-	135	1	-	55	0.05
	gnl|UG|Ta#S24513576	79171	0.98	132	-	234	52	-	153	0.0007
	gnl|UG|Ta#S24513576	79171	1	235	-	499	246	-	510	8e-14
	gnl|UG|Ta#S24513576	79171	1	497	*	553	595	-	651	0.04
	gnl|UG|Ta#S24513576	6229	0.99	751	*	954	1295	-	1093	1e-10
3	gnl|UG|Ta#S24513646	6708	0.98	42	-	167	1363	-	1239	1e-05
	gnl|UG|Ta#S24513646	6708	0.99	163	-	286	1123	-	1000	1e-05
	gnl|UG|Ta#S24513646	20875	0.97	286	*	362	1	-	77	0.006
	gnl|UG|Ta#S24513646	14883	0.98	496	*	546	57	-	107	0.4
	gnl|UG|Ta#S24513646	14883	0.98	544	-	709	499	-	664	1e-07
2	gnl|UG|Ta#S24623046	13853	0.98	53	*	207	155	-	1	2e-07
	gnl|UG|Ta#S24623046	15873	0.97	500	*	605	148	-	251	0.0007
2	gnl|UG|Ta#S24623189	82466	0.97	680	-	746	8	-	74	0.03
	gnl|UG|Ta#S24623189	136378	1	747	-	838	222	-	313	0.0002
2	gnl|UG|Ta#S26023366	24584	0.98	17	*	85	69	-	1	0.04
	gnl|UG|Ta#S26023366	26470	0.98	116	*	276	1688	-	1528	1e-07
3	gnl|UG|Ta#S26024076	213903	0.99	193	*	312	59	-	178	2e-05
	gnl|UG|Ta#S26024076	84578	0.98	387	*	494	601	-	493	0.0004
	gnl|UG|Ta#S26024076	84578	0.98	489	-	555	139	-	73	0.06
	gnl|UG|Ta#S26024076	96540	0.97	553	*	663	827	-	718	0.0001
	gnl|UG|Ta#S26024076	96540	1	654	*	713	112	-	53	0.09
2	gnl|UG|Ta#S26025117	1484	1	65	*	323	401	-	659	2e-13
	gnl|UG|Ta#S26025117	27142	0.99	559	*	863	1	-	305	1e-15
4	gnl|UG|Ta#S26026075	25134	0.99	97	*	374	556	-	833	3e-14
	gnl|UG|Ta#S26026075	25288	1	456	*	544	336	-	248	0.0007
	gnl|UG|Ta#S26026075	27246	1	544	-	631	183	-	96	0.0002
	gnl|UG|Ta#S26026075	21854	1	631	-	680	573	-	524	0.03
	gnl|UG|Ta#S26026075	21854	1	678	-	736	452	-	394	0.03
3	gnl|UG|Ta#S26027363	67378	1	234	*	335	1037	-	936	0.0004
	gnl|UG|Ta#S26027363	20295	0.98	443	*	522	856	-	777	0.003
	gnl|UG|Ta#S26027363	102969	0.98	520	-	599	173	-	93	0.003
2	gnl|UG|Ta#S26027375	84413	1	244	-	379	460	-	325	5e-06
	gnl|UG|Ta#S26027375	14662	0.99	376	-	767	313	-	701	00:00:00
5	gnl|UG|Ta#S26027532	93068	0.98	10	-	129	302	-	183	9e-05
	gnl|UG|Ta#S26027532	93068	1	126	*	184	66	-	8	0.03
	gnl|UG|Ta#S26027532	98050	0.98	204	*	270	359	-	292	0.05
	gnl|UG|Ta#S26027532	98050	1	270	-	342	191	-	119	0.005
	gnl|UG|Ta#S26027532	98051	0.98	336	*	396	272	-	211	0.01
	gnl|UG|Ta#S26027532	93069	1	470	*	535	76	-	11	0.04
	gnl|UG|Ta#S26027532	16737	1	534	-	594	269	-	329	0.02
	gnl|UG|Ta#S26027532	16737	0.99	594	-	871	417	-	696	4e-14
2	gnl|UG|Ta#S26028065	2219	0.97	95	*	274	1	-	180	8e-08
	gnl|UG|Ta#S26028065	2219	0.98	392	*	543	606	-	757	1e-07
	gnl|UG|Ta#S26028065	76436	0.99	542	-	718	489	-	666	4e-08
2	gnl|UG|Ta#S26028561	118679	0.98	298	*	427	371	-	242	2e-06
	gnl|UG|Ta#S26028561	132985	0.97	455	*	524	76	-	7	0.05
2	gnl|UG|Ta#S32217597	26455	1	7	-	324	346	-	29	1e-16
	gnl|UG|Ta#S32217597	84022	0.99	319	-	461	204	-	63	4e-07
2	gnl|UG|Ta#S32218091	166041	0.99	155	-	270	117	-	1	1e-05
	gnl|UG|Ta#S32218091	106006	0.97	271	-	386	130	-	15	2e-05
5	gnl|UG|Ta#S32493793	80748	0.99	1	*	214	213	-	1	3e-10
	gnl|UG|Ta#S32493793	126079	0.98	377	*	428	51	-	1	0.3
	gnl|UG|Ta#S32493793	26900	0.98	540	*	613	1114	-	1042	0.002
	gnl|UG|Ta#S32493793	212956	1	612	-	663	52	-	1	0.02
	gnl|UG|Ta#S32493793	58237	0.99	660	-	766	328	-	223	9e-05
	gnl|UG|Ta#S32493793	58237	0.97	762	-	890	138	-	11	9e-06
2	gnl|UG|Ta#S32496772	21221	0.97	1	*	130	294	-	423	9e-06
	gnl|UG|Ta#S32496772	29257	0.98	610	*	691	434	-	353	0.002
2	gnl|UG|Ta#S32508941	10094	0.98	1	-	57	616	-	672	0.01
	gnl|UG|Ta#S32508941	10094	0.98	50	*	148	770	-	867	0.0002
	gnl|UG|Ta#S32508941	3739	0.97	267	*	360	210	-	303	0.0002
2	gnl|UG|Ta#S32511278	62961	0.98	157	*	216	893	-	835	0.01
	gnl|UG|Ta#S32511278	80981	0.97	270	*	777	713	-	206	00:00:00
4	gnl|UG|Ta#S32514810	104758	1	220	-	287	81	-	148	0.003
	gnl|UG|Ta#S32514810	214721	0.98	288	-	343	237	-	183	0.02
	gnl|UG|Ta#S32514810	22460	1	337	-	445	672	-	780	4e-05
	gnl|UG|Ta#S32514810	38657	1	443	-	547	2386	-	2282	7e-05
	gnl|UG|Ta#S32514810	38657	0.99	542	-	868	1975	-	1650	3e-16
2	gnl|UG|Ta#S32518673	4048	1	1	*	65	65	-	1	0.09
	gnl|UG|Ta#S32518673	16641	1	351	*	663	752	-	440	1e-16
3	gnl|UG|Ta#S32536725	101314	0.98	1	-	61	586	-	526	0.05
	gnl|UG|Ta#S32536725	58079	1	61	-	165	344	-	448	4e-05
	gnl|UG|Ta#S32536725	13415	0.99	166	-	494	993	-	665	1e-17
2	gnl|UG|Ta#S32538145	85205	0.98	42	*	288	1	-	246	3e-12
	gnl|UG|Ta#S32538145	85206	1	535	*	617	1	-	83	0.001
2	gnl|UG|Ta#S32540263	12544	1	1	-	108	48	-	155	1e-05
	gnl|UG|Ta#S32540263	12544	1	108	*	201	497	-	590	0.0006
	gnl|UG|Ta#S32540263	96529	1	503	*	578	222	-	147	0.006
2	gnl|UG|Ta#S32546188	18794	0.99	1	*	436	198	-	634	00:00:00
	gnl|UG|Ta#S32546188	11793	1	492	*	583	162	-	253	0.0001
2	gnl|UG|Ta#S32549017	59989	0.97	8	*	190	1	-	183	6e-08
	gnl|UG|Ta#S32549017	176793	0.99	305	*	409	105	-	1	0.0003
2	gnl|UG|Ta#S32553676	91558	0.98	139	-	296	686	-	529	2e-07
	gnl|UG|Ta#S32553676	73156	0.98	294	-	380	510	-	596	0.003
2	gnl|UG|Ta#S32555511	25952	1	301	-	412	154	-	43	8e-05
	gnl|UG|Ta#S32555511	9585	1	412	-	472	451	-	511	0.02
	gnl|UG|Ta#S32555511	9585	0.98	464	-	590	593	-	718	3e-05
	gnl|UG|Ta#S32555511	9585	1	589	-	692	1258	-	1361	2e-05
2	gnl|UG|Ta#S32557382	25685	0.99	1	-	249	57	-	303	3e-12
	gnl|UG|Ta#S32557382	84767	1	245	-	372	221	-	94	8e-06
3	gnl|UG|Ta#S32560715	89957	1	1	-	116	223	-	108	5e-05
	gnl|UG|Ta#S32560715	89955	1	116	-	174	215	-	157	0.02
	gnl|UG|Ta#S32560715	89955	1	174	-	230	57	-	1	0.03
	gnl|UG|Ta#S32560715	89956	0.98	232	-	317	1	-	86	0.001
3	gnl|UG|Ta#S32565264	1517	1	1	-	109	1848	-	1956	3e-05
	gnl|UG|Ta#S32565264	1517	1	108	*	187	2158	-	2237	0.005
	gnl|UG|Ta#S32565264	74331	1	199	*	592	54	-	447	00:00:00
	gnl|UG|Ta#S32565264	16109	0.99	593	-	741	1	-	149	9e-07
2	gnl|UG|Ta#S32565510	28224	1	2	*	110	109	-	1	3e-05
	gnl|UG|Ta#S32565510	15959	0.98	630	*	709	1	-	80	0.006
2	gnl|UG|Ta#S32571677	169323	0.98	346	*	471	1	-	126	3e-05
	gnl|UG|Ta#S32571677	213747	0.98	795	*	854	112	-	53	0.09
2	gnl|UG|Ta#S32574441	22758	0.99	1	-	432	706	-	275	00:00:00
	gnl|UG|Ta#S32574441	107274	1	431	-	870	731	-	292	00:00:00
2	gnl|UG|Ta#S32584415	23977	1	1	*	122	122	-	1	2e-06
	gnl|UG|Ta#S32584415	104234	1	245	*	316	1	-	72	0.001
	gnl|UG|Ta#S32584415	104234	1	315	-	477	291	-	453	4e-08
2	gnl|UG|Ta#S32584543	13255	0.98	185	*	393	712	-	505	4e-10
	gnl|UG|Ta#S32584543	8262	0.98	818	*	915	378	-	474	0.0009
2	gnl|UG|Ta#S32587804	16262	1	283	-	479	1	-	197	5e-10
	gnl|UG|Ta#S32587804	16262	1	476	*	538	330	-	392	0.01
	gnl|UG|Ta#S32587804	80239	0.98	611	*	692	158	-	238	0.007
	gnl|UG|Ta#S32587804	80239	0.97	689	-	850	329	-	487	8e-07
2	gnl|UG|Ta#S32589351	29388	0.97	333	*	451	452	-	334	1e-05
	gnl|UG|Ta#S32589351	94668	0.97	675	*	788	205	-	321	2e-05
4	gnl|UG|Ta#S32589849	80229	0.98	3	*	171	167	-	1	1e-08
	gnl|UG|Ta#S32589849	80227	1	199	*	520	1	-	322	2e-17
	gnl|UG|Ta#S32589849	80230	1	517	-	656	142	-	3	2e-07
	gnl|UG|Ta#S32589849	20953	1	658	-	821	704	-	541	1e-08
	gnl|UG|Ta#S32589849	20953	0.98	819	-	869	463	-	414	0.1
2	gnl|UG|Ta#S32590426	64286	0.97	2	-	88	201	-	289	0.002
	gnl|UG|Ta#S32590426	62664	0.97	90	-	365	1	-	278	9e-13
3	gnl|UG|Ta#S32591253	83520	0.98	3	*	153	409	-	559	2e-07
	gnl|UG|Ta#S32591253	81842	0.98	313	*	466	518	-	365	4e-07
	gnl|UG|Ta#S32591253	25123	0.97	628	*	788	161	-	1	6e-07
2	gnl|UG|Ta#S32598439	103429	0.99	425	-	664	425	-	185	1e-12
	gnl|UG|Ta#S32598439	89002	0.99	659	-	829	132	-	301	2e-08
3	gnl|UG|Ta#S32601377	113188	0.98	110	-	323	575	-	361	8e-10
	gnl|UG|Ta#S32601377	113188	1	319	-	390	257	-	186	0.001
	gnl|UG|Ta#S32601377	113188	0.97	387	-	468	101	-	20	0.009
	gnl|UG|Ta#S32601377	113187	1	465	*	547	129	-	47	0.001
	gnl|UG|Ta#S32601377	59223	0.97	676	*	751	3172	-	3097	0.002
	gnl|UG|Ta#S32601377	59223	0.98	750	-	840	2945	-	2855	0.0002
3	gnl|UG|Ta#S32603452	108806	1	1	-	141	141	-	1	7e-07
	gnl|UG|Ta#S32603452	91950	1	136	*	394	1	-	259	2e-13
	gnl|UG|Ta#S32603452	78026	0.98	611	*	891	1485	-	1207	2e-14
2	gnl|UG|Ta#S32603568	9072	0.98	305	*	614	653	-	344	7e-15
	gnl|UG|Ta#S32603568	12042	0.98	689	*	854	1	-	165	2e-08
2	gnl|UG|Ta#S32611284	87568	1	383	-	453	331	-	261	0.005
	gnl|UG|Ta#S32611284	87568	0.97	451	-	624	182	-	7	3e-08
	gnl|UG|Ta#S32611284	87569	0.99	631	-	735	1	-	105	0.0003
2	gnl|UG|Ta#S32613151	161672	0.98	90	-	197	110	-	1	8e-05
	gnl|UG|Ta#S32613151	164677	0.97	198	-	274	106	-	30	0.005
2	gnl|UG|Ta#S32617419	26971	0.99	1	*	159	244	-	403	3e-07
	gnl|UG|Ta#S32617419	93794	0.99	248	*	391	1	-	145	6e-07
	gnl|UG|Ta#S32617419	93794	1	390	-	587	227	-	424	1e-10
	gnl|UG|Ta#S32617419	93794	0.97	587	-	766	600	-	779	5e-08
2	gnl|UG|Ta#S32618139	75824	1	1	-	106	106	-	1	9e-05
	gnl|UG|Ta#S32618139	137185	0.99	107	-	427	323	-	4	5e-16
2	gnl|UG|Ta#S32618170	90791	1	1	*	80	368	-	289	0.002
	gnl|UG|Ta#S32618170	90791	1	1	*	80	368	-	289	0.002
	gnl|UG|Ta#S32618170	87759	0.97	72	-	248	11	-	187	4e-08
3	gnl|UG|Ta#S32619768	76857	0.97	29	-	116	1	-	89	0.004
	gnl|UG|Ta#S32619768	76857	0.98	117	*	190	179	-	252	0.005
	gnl|UG|Ta#S32619768	27953	0.99	361	*	500	181	-	43	4e-06
2	gnl|UG|Ta#S32644391	74613	1	1	-	296	1828	-	2123	4e-15
	gnl|UG|Ta#S32644391	74613	1	293	-	423	2224	-	2354	2e-06
	gnl|UG|Ta#S32644391	74613	1	420	-	496	2491	-	2567	0.002
	gnl|UG|Ta#S32644391	74613	1	492	-	586	2663	-	2757	0.0002
	gnl|UG|Ta#S32644391	74613	1	584	-	681	2848	-	2945	0.0005
	gnl|UG|Ta#S32644391	6196	0.98	678	-	788	74	-	184	5e-05
2	gnl|UG|Ta#S32646177	98785	0.98	26	-	134	116	-	224	5e-05
	gnl|UG|Ta#S32646177	98785	0.97	133	-	207	324	-	398	0.004
	gnl|UG|Ta#S32646177	98785	0.98	205	*	258	478	-	531	0.04
	gnl|UG|Ta#S32646177	102802	0.98	350	*	421	72	-	1	0.004
2	gnl|UG|Ta#S32660039	5166	0.98	1	-	178	178	-	1	1e-08
	gnl|UG|Ta#S32660039	16602	0.97	179	-	592	1	-	414	00:00:00
2	gnl|UG|Ta#S32663877	86813	0.98	2	*	467	483	-	947	00:00:00
	gnl|UG|Ta#S32663877	86813	0.98	2	*	467	483	-	947	00:00:00
	gnl|UG|Ta#S32663877	12467	0.98	585	*	646	844	-	784	0.08
2	gnl|UG|Ta#S32663981	13057	0.99	1	-	288	288	-	1	2e-14
	gnl|UG|Ta#S32663981	95703	1	289	-	539	251	-	1	4e-13
3	gnl|UG|Ta#S32665003	23362	0.97	1	*	68	68	-	1	0.05
	gnl|UG|Ta#S32665003	175256	0.97	98	*	200	103	-	1	0.0008
	gnl|UG|Ta#S32665003	211343	0.97	201	-	531	331	-	1	2e-16
3	gnl|UG|Ta#S32666475	13998	0.98	1	*	63	64	-	2	0.06
	gnl|UG|Ta#S32666475	24362	0.98	282	*	365	407	-	490	0.001
	gnl|UG|Ta#S32666475	24362	0.97	364	-	496	575	-	707	2e-06
2	gnl|UG|Ta#S32668723	7764	0.97	310	-	520	341	-	132	6e-10
	gnl|UG|Ta#S32668723	7764	0.98	518	-	577	60	-	1	0.03
	gnl|UG|Ta#S32668723	173892	0.97	578	-	700	1	-	123	7e-05
2	gnl|UG|Ta#S32684868	96265	0.97	1	*	160	161	-	2	8e-07
	gnl|UG|Ta#S32684868	84967	0.97	627	*	731	889	-	785	0.0007
2	gnl|UG|Ta#S32689404	100379	0.99	24	*	492	483	-	15	00:00:00
	gnl|UG|Ta#S32689404	9942	0.98	823	*	885	109	-	170	0.03
2	gnl|UG|Ta#S32689576	25163	0.98	504	*	639	100	-	235	9e-06
	gnl|UG|Ta#S32689576	74425	0.97	671	*	788	1	-	118	4e-05
2	gnl|UG|Ta#S32690092	12947	1	1	-	534	1510	-	977	00:00:00
	gnl|UG|Ta#S32690092	12778	1	533	-	649	117	-	1	1e-05
3	gnl|UG|Ta#S32692490	2532	1	1	*	455	1079	-	625	00:00:00
	gnl|UG|Ta#S32692490	107658	1	651	*	703	382	-	330	0.06
	gnl|UG|Ta#S32692490	74870	1	726	*	784	228	-	170	0.03
	gnl|UG|Ta#S32692490	74870	0.97	782	-	865	82	-	1	0.003
2	gnl|UG|Ta#S32692696	23030	1	1	*	79	65	-	143	0.001
	gnl|UG|Ta#S32692696	175920	0.99	319	*	543	1	-	224	1e-11
2	gnl|UG|Ta#S32693423	84471	1	4	-	98	95	-	1	0.0002
	gnl|UG|Ta#S32693423	84473	0.97	104	-	767	11	-	674	00:00:00
2	gnl|UG|Ta#S32696837	2999	0.98	185	*	555	371	-	1	00:00:00
	gnl|UG|Ta#S32696837	29109	0.99	708	*	821	1	-	113	1e-05
2	gnl|UG|Ta#S32699389	95855	0.98	1	*	307	831	-	1135	1e-15
	gnl|UG|Ta#S32699389	1791	0.98	345	*	394	91	-	140	0.9
2	gnl|UG|Ta#S32704446	28719	1	1	-	482	923	-	1404	00:00:00
	gnl|UG|Ta#S32704446	94382	1	483	-	724	638	-	397	4e-12
2	gnl|UG|Ta#S32723428	52491	1	1	*	306	306	-	1	1e-16
	gnl|UG|Ta#S32723428	53816	0.99	353	*	821	1	-	468	00:00:00
2	gnl|UG|Ta#S32732343	21675	0.98	1	*	284	130	-	414	4e-14
	gnl|UG|Ta#S32732343	94875	0.97	412	*	705	98	-	391	8e-14
2	gnl|UG|Ta#S32734499	9447	0.98	304	*	369	82	-	148	0.01
	gnl|UG|Ta#S32734499	139470	1	507	*	572	142	-	77	0.03
2	gnl|UG|Ta#S32736977	21310	0.99	1	-	521	233	-	754	00:00:00
	gnl|UG|Ta#S32736977	21310	1	514	*	638	843	-	967	6e-06
	gnl|UG|Ta#S32736977	4751	0.99	707	*	935	661	-	435	7e-11
3	gnl|UG|Ta#S33855272	11729	0.99	1	-	304	633	-	937	4e-15
	gnl|UG|Ta#S33855272	4351	0.98	300	-	427	241	-	369	3e-06
	gnl|UG|Ta#S33855272	4351	1	426	-	481	448	-	503	0.01
	gnl|UG|Ta#S33855272	28910	1	481	-	633	159	-	311	2e-07
	gnl|UG|Ta#S33855272	28910	1	632	-	696	389	-	453	0.01
	gnl|UG|Ta#S33855272	28910	1	693	-	828	554	-	689	5e-06
	gnl|UG|Ta#S33855272	28910	0.99	827	-	958	767	-	898	4e-06
5	gnl|UG|Ta#S33890031	93004	1	1	*	56	534	-	479	0.02
	gnl|UG|Ta#S33890031	9335	0.99	377	*	504	698	-	571	8e-06
	gnl|UG|Ta#S33890031	9335	1	503	-	556	418	-	365	0.02
	gnl|UG|Ta#S33890031	9335	0.97	552	-	627	197	-	121	0.003
	gnl|UG|Ta#S33890031	21444	0.97	622	-	732	612	-	502	0.0005
	gnl|UG|Ta#S33890031	21444	0.97	731	-	814	128	-	45	0.001
	gnl|UG|Ta#S33890031	77338	0.98	813	*	895	541	-	623	0.008
	gnl|UG|Ta#S33890031	122120	0.98	1239	*	1360	3	-	124	8e-05
2	gnl|UG|Ta#S37752467	95213	0.97	1	-	258	423	-	679	5e-12
	gnl|UG|Ta#S37752467	95213	0.97	252	-	413	1437	-	1598	6e-07
	gnl|UG|Ta#S37752467	23749	0.99	412	-	530	44	-	162	4e-05
2	gnl|UG|Ta#S37757845	62990	0.99	1	-	171	313	-	144	9e-08
	gnl|UG|Ta#S37757845	29305	1	167	-	341	62	-	236	3e-09
2	gnl|UG|Ta#S37758403	15904	0.97	196	*	335	142	-	3	8e-06
	gnl|UG|Ta#S37758403	85029	0.97	587	*	662	3	-	77	0.005
2	gnl|UG|Ta#S37771866	6806	0.99	196	-	377	613	-	432	1e-09
	gnl|UG|Ta#S37771866	24313	0.99	376	*	723	916	-	1261	2e-18
	gnl|UG|Ta#S37771866	24313	0.99	376	*	723	916	-	1261	2e-18
	gnl|UG|Ta#S37771866	24313	1	724	*	839	2000	-	2115	5e-05
	gnl|UG|Ta#S37771866	24313	1	724	*	839	2000	-	2115	5e-05
2	gnl|UG|Ta#S37780663	24599	0.98	517	*	567	225	-	175	0.4
	gnl|UG|Ta#S37780663	110028	1	809	*	945	501	-	365	1e-06
2	gnl|UG|Ta#S37788420	103303	0.98	1	*	397	124	-	520	00:00:00
	gnl|UG|Ta#S37788420	21698	0.98	594	*	745	1	-	154	3e-07
2	gnl|UG|Ta#S37832050	16700	1	179	*	421	383	-	625	1e-12
	gnl|UG|Ta#S37832050	89128	0.98	444	*	631	1	-	186	3e-09
	gnl|UG|Ta#S37832050	89128	0.97	622	-	761	337	-	477	2e-06
2	gnl|UG|Ta#S37833899	10402	0.97	412	*	494	213	-	131	0.002
	gnl|UG|Ta#S37833899	84640	0.97	663	*	766	492	-	388	0.0002
2	gnl|UG|Ta#S37842612	109494	0.99	1	*	375	118	-	491	00:00:00
	gnl|UG|Ta#S37842612	12985	1	395	*	795	2639	-	2239	00:00:00
2	gnl|UG|Ta#S37854943	101800	1	2	*	320	167	-	485	6e-17
	gnl|UG|Ta#S37854943	16896	1	578	*	728	615	-	465	2e-07
3	gnl|UG|Ta#S37866854	69629	0.98	339	-	516	293	-	469	6e-08
	gnl|UG|Ta#S37866854	191033	1	514	-	574	49	-	109	0.02
	gnl|UG|Ta#S37866854	66086	0.98	573	-	672	279	-	378	0.0008
	gnl|UG|Ta#S37866854	66086	0.97	668	-	748	773	-	853	0.003
2	gnl|UG|Ta#S37877947	29586	0.99	1	*	426	531	-	106	00:00:00
	gnl|UG|Ta#S37877947	26617	1	546	*	660	626	-	512	2e-05
	gnl|UG|Ta#S37877947	26617	1	658	-	722	326	-	262	0.01
2	gnl|UG|Ta#S37884730	14369	0.98	246	-	321	626	-	551	0.004
	gnl|UG|Ta#S37884730	14369	0.98	318	-	377	470	-	411	0.03
	gnl|UG|Ta#S37884730	6719	1	376	-	436	237	-	177	0.02
2	gnl|UG|Ta#S37905126	108649	0.97	1	-	73	87	-	157	0.02
	gnl|UG|Ta#S37905126	124335	1	74	-	201	1	-	128	8e-06
2	gnl|UG|Ta#S37911239	102112	0.98	1	*	57	63	-	7	0.01
	gnl|UG|Ta#S37911239	12190	0.98	464	*	678	687	-	473	4e-10
2	gnl|UG|Ta#S37918221	7288	1	32	-	106	787	-	861	0.002
	gnl|UG|Ta#S37918221	7288	1	105	-	160	957	-	1012	0.09
	gnl|UG|Ta#S37918221	72350	1	159	-	269	191	-	301	2e-05
	gnl|UG|Ta#S37918221	72350	1	268	-	391	487	-	610	1e-06
	gnl|UG|Ta#S37918221	72350	0.98	390	-	670	686	-	965	5e-14
2	gnl|UG|Ta#S41658082	77992	0.99	162	*	334	1	-	172	2e-08
	gnl|UG|Ta#S41658082	83636	0.99	659	*	1077	515	-	98	00:00:00
2	gnl|UG|Ta#S43837848	27250	1	100	-	221	1	-	122	4e-06
	gnl|UG|Ta#S43837848	27250	1	220	-	340	204	-	324	1e-05
	gnl|UG|Ta#S43837848	27250	1	338	-	506	418	-	586	3e-08
	gnl|UG|Ta#S43837848	27250	1	506	*	591	817	-	902	0.0004
	gnl|UG|Ta#S43837848	23428	0.98	726	*	1293	1788	-	1217	00:00:00
6	gnl|UG|Ta#S47626310	105639	0.98	1	-	58	229	-	172	0.06
	gnl|UG|Ta#S47626310	105639	0.98	55	-	127	83	-	11	0.003
	gnl|UG|Ta#S47626310	93023	1	121	-	213	868	-	776	0.0004
	gnl|UG|Ta#S47626310	89022	1	210	-	295	1494	-	1579	0.0003
	gnl|UG|Ta#S47626310	89022	0.98	294	-	355	1672	-	1733	0.03
	gnl|UG|Ta#S47626310	89022	0.98	355	-	539	1804	-	1988	7e-09
	gnl|UG|Ta#S47626310	89022	1	538	*	595	2069	-	2126	0.01
	gnl|UG|Ta#S47626310	13731	1	633	*	868	937	-	702	1e-12
	gnl|UG|Ta#S47626310	98399	1	865	-	946	400	-	319	0.006
	gnl|UG|Ta#S47626310	98399	1	942	*	1072	249	-	119	3e-06
	gnl|UG|Ta#S47626310	22540	0.98	1091	*	1167	436	-	360	0.002
2	gnl|UG|Ta#S50371846	18899	0.98	755	*	816	62	-	1	0.01
	gnl|UG|Ta#S50371846	17728	0.97	3427	*	3522	549	-	456	0.0003
	gnl|UG|Ta#S50371846	17728	0.99	3517	-	3656	338	-	198	6e-06
2	gnl|UG|Ta#S50382202	68092	0.97	325	*	443	141	-	22	1e-05
	gnl|UG|Ta#S50382202	68966	0.97	503	*	620	118	-	1	4e-05

## Sheet: 5AL
Unigenes mapped on 5AL. Asterisks to show gaps (ie: regions not contiguously covered by contigs ) in the unigenes. Unigenes showing multiple matches on same positions by different contigs were removed. Parameters: identity ≥ 97%, coverage ≥ 50 consecutive bases
contigs (n)	Unigene	contig identifier	identity	region covered on unigene			region covered on contig			e-value
2	gnl|UG|Ta#S12857615	15066	1	15	*	160	146	-	1	2e-07
	gnl|UG|Ta#S12857615	45238	1	286	*	630	1	-	345	00:00:00
3	gnl|UG|Ta#S12858222	234275	0.98	16	*	265	247	-	1	4e-12
	gnl|UG|Ta#S12858222	230675	1	371	*	543	399	-	571	2e-08
	gnl|UG|Ta#S12858222	11724	1	544	-	642	1	-	99	0.0003
3	gnl|UG|Ta#S12862832	169117	0.97	75	-	173	99	-	1	0.0006
	gnl|UG|Ta#S12862832	16035	0.99	174	-	335	727	-	566	1e-08
	gnl|UG|Ta#S12862832	16035	0.98	332	-	451	456	-	336	1e-05
	gnl|UG|Ta#S12862832	128271	0.97	447	-	545	2145	-	2047	0.0002
2	gnl|UG|Ta#S12863025	175304	0.98	15	-	206	286	-	477	1e-09
	gnl|UG|Ta#S12863025	175305	0.98	207	-	297	523	-	433	0.0003
	gnl|UG|Ta#S12863025	175305	0.99	295	-	460	355	-	190	6e-08
2	gnl|UG|Ta#S12869957	229381	0.99	27	-	436	404	-	813	00:00:00
	gnl|UG|Ta#S12869957	31848	1	437	-	490	640	-	587	0.02
2	gnl|UG|Ta#S12885513	131162	0.99	103	*	301	93	-	291	3e-10
	gnl|UG|Ta#S12885513	131687	0.97	373	*	454	1	-	83	0.001
	gnl|UG|Ta#S12885513	131687	0.98	455	-	592	278	-	415	1e-06
2	gnl|UG|Ta#S12886610	70527	0.97	172	-	254	133	-	216	0.004
	gnl|UG|Ta#S12886610	144914	0.97	257	-	523	484	-	218	4e-12
2	gnl|UG|Ta#S12888246	158940	1	22	*	75	664	-	717	0.02
	gnl|UG|Ta#S12888246	113405	0.97	447	*	583	141	-	5	8e-06
3	gnl|UG|Ta#S12902652	65415	0.99	116	-	438	325	-	1	2e-16
	gnl|UG|Ta#S12902652	225346	0.99	439	-	544	1	-	107	0.0002
	gnl|UG|Ta#S12902652	26495	1	539	-	631	136	-	228	0.0006
3	gnl|UG|Ta#S12906540	217312	1	9	-	225	217	-	1	9e-11
	gnl|UG|Ta#S12906540	338446	1	226	-	368	143	-	1	1e-07
	gnl|UG|Ta#S12906540	171179	0.99	369	-	513	144	-	1	2e-07
3	gnl|UG|Ta#S12907003	190358	1	9	-	137	129	-	1	8e-06
	gnl|UG|Ta#S12907003	240889	1	138	-	247	116	-	7	3e-05
	gnl|UG|Ta#S12907003	16187	0.98	240	-	340	50	-	151	0.0006
	gnl|UG|Ta#S12907003	16187	1	339	-	424	244	-	329	0.0006
2	gnl|UG|Ta#S12914192	175979	1	19	*	162	144	-	1	2e-07
	gnl|UG|Ta#S12914192	53414	0.98	280	*	444	164	-	1	3e-08
2	gnl|UG|Ta#S12916254	131633	0.99	1	*	324	324	-	1	5e-16
	gnl|UG|Ta#S12916254	34908	0.99	396	*	654	1	-	259	1e-13
2	gnl|UG|Ta#S12922872	18580	1	587	-	680	273	-	366	0.0004
	gnl|UG|Ta#S12922872	18580	0.99	681	*	845	475	-	639	6e-08
	gnl|UG|Ta#S12922872	61582	0.97	943	*	1082	205	-	66	1e-06
7	gnl|UG|Ta#S12922878	62791	1	518	-	737	937	-	718	9e-11
	gnl|UG|Ta#S12922878	42964	0.99	734	-	1334	182	-	782	00:00:00
	gnl|UG|Ta#S12922878	282430	1	1335	*	1531	1	-	197	5e-10
	gnl|UG|Ta#S12922878	207715	1	1545	*	1664	1	-	120	3e-05
	gnl|UG|Ta#S12922878	210778	0.99	1803	*	1955	1	-	153	7e-07
	gnl|UG|Ta#S12922878	222319	1	1956	-	2064	1	-	109	4e-05
	gnl|UG|Ta#S12922878	170143	1	2065	-	2402	1	-	338	2e-17
	gnl|UG|Ta#S12922878	170143	0.99	2396	-	2837	462	-	903	00:00:00
	gnl|UG|Ta#S12922878	170143	1	2835	-	3052	1136	-	1353	1e-11
2	gnl|UG|Ta#S12923100	174554	1	507	*	617	1	-	111	1e-05
	gnl|UG|Ta#S12923100	191299	1	1230	*	1350	1	-	121	3e-05
6	gnl|UG|Ta#S12923118	191164	1	232	*	309	217	-	140	0.003
	gnl|UG|Ta#S12923118	39029	1	446	*	501	773	-	828	0.05
	gnl|UG|Ta#S12923118	45356	1	501	-	551	79	-	129	0.03
	gnl|UG|Ta#S12923118	45356	1	549	-	636	489	-	576	0.0008
	gnl|UG|Ta#S12923118	45356	0.99	634	-	837	673	-	876	5e-10
	gnl|UG|Ta#S12923118	207524	0.99	834	*	968	484	-	351	9e-06
	gnl|UG|Ta#S12923118	65062	0.97	990	*	1063	250	-	176	0.01
	gnl|UG|Ta#S12923118	140473	0.98	1065	-	1129	178	-	114	0.02
3	gnl|UG|Ta#S12923120	36136	1	611	-	1098	1	-	488	00:00:00
	gnl|UG|Ta#S12923120	36136	1	1094	-	1173	566	-	645	0.003
	gnl|UG|Ta#S12923120	36136	1	1174	*	1241	746	-	813	0.02
	gnl|UG|Ta#S12923120	22656	1	1259	*	1395	1358	-	1222	7e-06
	gnl|UG|Ta#S12923120	22656	1	1393	-	1566	842	-	669	2e-08
	gnl|UG|Ta#S12923120	22656	0.97	1563	*	1785	554	-	331	2e-10
	gnl|UG|Ta#S12923120	22656	1	1773	*	2026	254	-	1	6e-13
	gnl|UG|Ta#S12923120	146136	1	2094	*	2219	675	-	550	9e-06
3	gnl|UG|Ta#S12923146	146388	1	40	*	100	63	-	3	0.02
	gnl|UG|Ta#S12923146	342175	1	118	*	239	1	-	122	2e-06
	gnl|UG|Ta#S12923146	146387	1	237	-	310	1210	-	1137	0.001
2	gnl|UG|Ta#S12923192	161837	0.97	481	-	636	156	-	1	8e-07
	gnl|UG|Ta#S12923192	177393	0.98	637	-	751	253	-	139	2e-05
2	gnl|UG|Ta#S12923249	29902	0.98	1	*	333	91	-	423	6e-16
	gnl|UG|Ta#S12923249	66211	0.98	345	*	581	197	-	434	1e-11
	gnl|UG|Ta#S12923249	66211	0.99	572	-	927	516	-	871	00:00:00
	gnl|UG|Ta#S12923249	66211	0.99	925	-	1052	961	-	1088	2e-06
3	gnl|UG|Ta#S12923495	71832	1	392	*	454	5	-	67	0.01
	gnl|UG|Ta#S12923495	29797	0.98	708	*	780	61	-	133	0.001
	gnl|UG|Ta#S12923495	46805	0.99	1099	*	1300	1	-	201	9e-10
	gnl|UG|Ta#S12923495	46805	0.98	1295	-	1380	280	-	365	0.008
	gnl|UG|Ta#S12923495	46805	0.98	1379	-	1532	440	-	593	6e-07
	gnl|UG|Ta#S12923495	46805	1	1531	-	1625	675	-	769	0.0002
2	gnl|UG|Ta#S12927943	150769	0.97	16	*	154	1	-	136	2e-06
	gnl|UG|Ta#S12927943	150771	1	296	*	360	58	-	122	0.02
3	gnl|UG|Ta#S12930821	33565	0.97	1	*	221	226	-	1	8e-10
	gnl|UG|Ta#S12930821	137628	0.99	255	*	379	2	-	126	5e-06
	gnl|UG|Ta#S12930821	137095	0.98	394	*	448	1584	-	1530	0.04
	gnl|UG|Ta#S12930821	137095	1	443	-	669	1249	-	1023	2e-11
4	gnl|UG|Ta#S12930998	220667	0.99	1	-	120	38	-	158	3e-05
	gnl|UG|Ta#S12930998	220666	0.99	121	*	332	214	-	1	3e-10
	gnl|UG|Ta#S12930998	54901	0.98	432	*	521	186	-	98	0.0005
	gnl|UG|Ta#S12930998	51915	1	513	-	713	260	-	60	6e-10
2	gnl|UG|Ta#S12940574	50450	0.98	396	-	494	243	-	145	0.0001
	gnl|UG|Ta#S12940574	50450	0.98	493	*	563	71	-	1	0.005
	gnl|UG|Ta#S12940574	69241	0.99	648	*	752	379	-	275	0.0007
2	gnl|UG|Ta#S12941651	29627	0.97	311	*	485	283	-	109	8e-08
	gnl|UG|Ta#S12941651	45664	0.98	572	*	682	488	-	378	1e-05
	gnl|UG|Ta#S12941651	45664	0.98	680	-	735	123	-	68	0.01
3	gnl|UG|Ta#S12941747	89819	0.99	1	-	212	102	-	315	3e-10
	gnl|UG|Ta#S12941747	102175	0.98	218	*	409	1	-	192	1e-09
	gnl|UG|Ta#S12941747	341580	0.98	421	*	682	261	-	1	6e-12
2	gnl|UG|Ta#S12945146	192281	0.98	3	-	233	130	-	362	1e-11
	gnl|UG|Ta#S12945146	192281	0.99	226	*	425	456	-	653	1e-09
	gnl|UG|Ta#S12945146	192282	0.99	442	*	642	1	-	200	9e-10
3	gnl|UG|Ta#S12945281	141140	0.98	15	*	153	139	-	1	4e-06
	gnl|UG|Ta#S12945281	141140	0.98	15	*	153	139	-	1	4e-06
	gnl|UG|Ta#S12945281	141142	0.98	154	-	384	1	-	231	6e-11
	gnl|UG|Ta#S12945281	221202	0.99	385	-	751	442	-	76	00:00:00
2	gnl|UG|Ta#S12947060	41216	1	1	*	491	639	-	1129	00:00:00
	gnl|UG|Ta#S12947060	43136	0.98	609	*	749	1045	-	907	1e-06
3	gnl|UG|Ta#S12949108	149121	0.98	4	-	156	267	-	419	3e-07
	gnl|UG|Ta#S12949108	57673	0.98	157	-	309	694	-	846	6e-07
	gnl|UG|Ta#S12949108	196261	0.99	310	-	530	270	-	50	2e-11
2	gnl|UG|Ta#S12952316	192412	0.97	1	*	108	10	-	117	0.0001
	gnl|UG|Ta#S12952316	192413	1	192	*	244	1202	-	1150	0.04
2	gnl|UG|Ta#S12954391	17426	1	513	-	634	204	-	83	5e-06
	gnl|UG|Ta#S12954391	135959	0.97	628	-	715	264	-	350	0.003
2	gnl|UG|Ta#S12955650	105926	0.99	220	-	415	195	-	1	6e-09
	gnl|UG|Ta#S12955650	106293	0.99	416	-	715	1	-	299	4e-15
2	gnl|UG|Ta#S12956207	77011	0.99	1	*	202	203	-	1	8e-10
	gnl|UG|Ta#S12956207	166378	1	376	*	706	1188	-	858	3e-17
2	gnl|UG|Ta#S12959760	84013	1	90	*	235	1	-	146	2e-07
	gnl|UG|Ta#S12959760	188848	1	612	*	662	181	-	131	0.01
2	gnl|UG|Ta#S12980996	92012	0.98	1	-	54	357	-	410	0.01
	gnl|UG|Ta#S12980996	232924	0.97	56	-	197	189	-	49	1e-06
2	gnl|UG|Ta#S12989027	344663	0.98	724	-	901	1	-	178	2e-08
	gnl|UG|Ta#S12989027	183407	0.97	900	-	1005	43	-	148	0.0001
2	gnl|UG|Ta#S12990930	157017	0.98	24	*	179	364	-	520	5e-07
	gnl|UG|Ta#S12990930	61063	0.99	397	*	542	474	-	328	8e-07
2	gnl|UG|Ta#S12991144	300276	0.97	262	-	368	1	-	107	0.0001
	gnl|UG|Ta#S12991144	40408	0.98	369	-	652	1	-	285	2e-14
2	gnl|UG|Ta#S12991662	76030	1	157	-	251	1	-	95	0.0005
	gnl|UG|Ta#S12991662	137883	1	251	-	448	497	-	300	3e-10
	gnl|UG|Ta#S12991662	137883	1	446	-	607	201	-	40	3e-08
2	gnl|UG|Ta#S12994122	100748	0.98	16	*	264	756	-	510	2e-12
	gnl|UG|Ta#S12994122	100748	0.98	88	*	138	607	-	557	0.5
	gnl|UG|Ta#S12994122	123538	0.99	259	*	547	95	-	383	3e-15
2	gnl|UG|Ta#S12996303	66389	0.99	34	-	353	166	-	487	2e-16
	gnl|UG|Ta#S12996303	182608	0.99	360	-	562	1	-	204	2e-10
2	gnl|UG|Ta#S12999288	130945	0.98	1	*	154	590	-	743	1e-07
	gnl|UG|Ta#S12999288	36545	0.98	392	*	454	393	-	331	0.01
2	gnl|UG|Ta#S13002280	9729	1	47	-	127	981	-	901	0.003
	gnl|UG|Ta#S13002280	9729	0.98	125	-	221	642	-	546	0.0002
	gnl|UG|Ta#S13002280	9729	0.97	221	-	297	419	-	343	0.001
	gnl|UG|Ta#S13002280	9729	1	295	*	414	245	-	126	6e-05
	gnl|UG|Ta#S13002280	284780	0.97	481	*	666	1	-	186	6e-08
2	gnl|UG|Ta#S13020418	191745	0.99	421	-	547	1	-	128	4e-06
	gnl|UG|Ta#S13020418	44242	1	548	-	701	1	-	154	8e-07
2	gnl|UG|Ta#S13032219	33290	0.97	1	*	97	726	-	821	0.0002
	gnl|UG|Ta#S13032219	154581	0.97	327	*	491	608	-	442	6e-07
2	gnl|UG|Ta#S13039445	43586	1	3	*	61	538	-	596	0.05
	gnl|UG|Ta#S13039445	178086	0.98	260	*	337	985	-	908	0.006
2	gnl|UG|Ta#S13043255	47198	0.99	12	-	133	21	-	143	2e-05
	gnl|UG|Ta#S13043255	47198	1	132	*	207	248	-	323	0.002
	gnl|UG|Ta#S13043255	192174	0.98	525	*	622	1	-	97	0.0002
3	gnl|UG|Ta#S13048678	190354	0.97	1	*	148	148	-	1	8e-06
	gnl|UG|Ta#S13048678	190352	0.99	233	*	396	164	-	1	1e-08
	gnl|UG|Ta#S13048678	73311	1	422	*	491	460	-	391	0.004
	gnl|UG|Ta#S13048678	73311	0.97	489	-	726	244	-	7	4e-11
3	gnl|UG|Ta#S13048867	10032	1	238	-	290	1	-	53	0.03
	gnl|UG|Ta#S13048867	10032	1	287	-	496	162	-	371	2e-10
	gnl|UG|Ta#S13048867	10032	1	493	-	595	472	-	574	0.0005
	gnl|UG|Ta#S13048867	10032	1	595	-	954	724	-	1083	00:00:00
	gnl|UG|Ta#S13048867	10032	1	951	-	1032	1199	-	1280	0.002
	gnl|UG|Ta#S13048867	44844	0.99	1035	-	1418	407	-	24	00:00:00
	gnl|UG|Ta#S13048867	22055	0.98	1414	-	1938	96	-	619	00:00:00
3	gnl|UG|Ta#S13050521	37578	0.97	1	-	77	1152	-	1074	0.003
	gnl|UG|Ta#S13050521	37578	1	77	-	158	560	-	479	0.009
	gnl|UG|Ta#S13050521	215441	1	158	*	277	260	-	141	6e-05
	gnl|UG|Ta#S13050521	21324	1	367	*	423	1	-	57	0.07
	gnl|UG|Ta#S13050521	21324	1	423	-	486	129	-	192	0.09
	gnl|UG|Ta#S13050521	21324	1	484	*	537	269	-	322	0.03
	gnl|UG|Ta#S13050521	21324	1	580	*	664	624	-	708	0.002
3	gnl|UG|Ta#S13056401	47793	1	136	*	197	234	-	173	0.01
	gnl|UG|Ta#S13056401	145555	0.97	250	*	333	119	-	36	0.001
	gnl|UG|Ta#S13056401	145557	0.99	478	*	589	1468	-	1579	8e-05
2	gnl|UG|Ta#S13057543	324693	0.97	145	*	220	36	-	111	0.004
	gnl|UG|Ta#S13057543	336053	0.97	413	*	547	13	-	147	1e-06
2	gnl|UG|Ta#S13076424	14675	0.99	1	*	612	613	-	1	00:00:00
	gnl|UG|Ta#S13076424	14675	0.99	1	*	612	613	-	1	00:00:00
	gnl|UG|Ta#S13076424	166403	1	613	-	673	570	-	510	0.04
2	gnl|UG|Ta#S13079811	253801	0.99	21	-	149	130	-	1	3e-06
	gnl|UG|Ta#S13079811	14675	0.97	151	*	755	1	-	617	00:00:00
	gnl|UG|Ta#S13079811	14675	0.97	151	*	755	1	-	617	00:00:00
2	gnl|UG|Ta#S13115492	43968	1	287	*	371	38	-	122	0.002
	gnl|UG|Ta#S13115492	223809	1	483	*	689	63	-	269	3e-10
3	gnl|UG|Ta#S13115875	179175	1	16	*	67	182	-	131	0.04
	gnl|UG|Ta#S13115875	35867	1	220	*	451	413	-	182	3e-12
	gnl|UG|Ta#S13115875	12368	1	450	-	666	155	-	371	7e-11
4	gnl|UG|Ta#S13117404	174246	0.99	45	*	221	343	-	519	6e-08
	gnl|UG|Ta#S13117404	42346	0.97	264	*	344	1	-	81	0.007
	gnl|UG|Ta#S13117404	52724	0.98	361	*	457	1	-	97	0.0002
	gnl|UG|Ta#S13117404	23993	1	657	*	749	245	-	337	0.0007
2	gnl|UG|Ta#S13117940	251349	0.97	136	-	248	462	-	353	0.0006
	gnl|UG|Ta#S13117940	251349	1	247	*	308	206	-	145	0.01
	gnl|UG|Ta#S13117940	172895	1	376	*	523	201	-	348	2e-07
	gnl|UG|Ta#S13117940	172895	1	524	-	680	444	-	600	2e-07
2	gnl|UG|Ta#S13122397	126424	1	226	-	344	119	-	1	2e-05
	gnl|UG|Ta#S13122397	132855	0.98	345	-	501	307	-	151	3e-07
2	gnl|UG|Ta#S13147495	120360	0.98	3	-	56	401	-	454	0.01
	gnl|UG|Ta#S13147495	62690	0.98	57	-	203	148	-	1	1e-07
2	gnl|UG|Ta#S13157257	31892	1	1	*	58	94	-	151	0.01
	gnl|UG|Ta#S13157257	38665	0.99	111	*	390	697	-	419	7e-14
2	gnl|UG|Ta#S13158660	211580	0.98	23	-	179	426	-	582	1e-07
	gnl|UG|Ta#S13158660	120035	0.97	176	-	363	932	-	1119	1e-09
2	gnl|UG|Ta#S13166435	135900	1	1	-	226	33	-	258	3e-11
	gnl|UG|Ta#S13166435	250979	0.97	227	-	334	1	-	107	0.0005
3	gnl|UG|Ta#S13205016	141140	0.98	23	*	87	578	-	642	0.01
	gnl|UG|Ta#S13205016	141140	0.98	23	*	87	578	-	642	0.01
	gnl|UG|Ta#S13205016	1605	0.98	88	-	278	1	-	189	7e-09
	gnl|UG|Ta#S13205016	194637	0.97	279	-	457	1	-	177	2e-08
2	gnl|UG|Ta#S13230913	277997	0.97	6	*	78	70	-	143	0.007
	gnl|UG|Ta#S13230913	361358	0.98	143	*	241	1	-	99	0.0005
3	gnl|UG|Ta#S13254066	99329	1	1	*	104	379	-	482	4e-05
	gnl|UG|Ta#S13254066	118272	0.99	192	*	433	1	-	241	1e-12
	gnl|UG|Ta#S13254066	284320	1	434	-	609	1	-	176	4e-09
3	gnl|UG|Ta#S13257421	32667	0.99	578	-	866	848	-	559	7e-15
	gnl|UG|Ta#S13257421	166426	0.99	865	-	1195	399	-	69	3e-17
	gnl|UG|Ta#S13257421	166420	1	1195	-	1460	519	-	784	9e-14
2	gnl|UG|Ta#S15824074	59578	0.97	292	-	613	320	-	1	1e-15
	gnl|UG|Ta#S15824074	286392	0.98	615	-	692	205	-	128	0.006
2	gnl|UG|Ta#S15880603	24445	1	615	*	694	21	-	100	0.001
	gnl|UG|Ta#S15880603	172791	0.98	704	*	759	1124	-	1069	0.01
3	gnl|UG|Ta#S15880748	168956	0.97	51	-	235	186	-	1	2e-08
	gnl|UG|Ta#S15880748	70815	0.98	236	*	371	1	-	136	2e-06
	gnl|UG|Ta#S15880748	168955	0.98	561	*	643	113	-	195	0.001
2	gnl|UG|Ta#S15880774	68893	0.97	142	*	249	1	-	106	0.0001
	gnl|UG|Ta#S15880774	76150	0.97	396	*	735	605	-	262	1e-16
2	gnl|UG|Ta#S15880990	148676	0.98	20	-	288	271	-	3	2e-13
	gnl|UG|Ta#S15880990	148677	0.98	291	-	708	630	-	213	00:00:00
2	gnl|UG|Ta#S15881358	30884	0.97	19	*	379	564	-	206	5e-17
	gnl|UG|Ta#S15881358	27256	1	442	*	567	1593	-	1468	3e-06
	gnl|UG|Ta#S15881358	27256	0.99	567	-	700	1391	-	1258	5e-06
3	gnl|UG|Ta#S15902621	52719	1	17	-	278	483	-	222	8e-13
	gnl|UG|Ta#S15902621	193879	1	278	-	348	77	-	7	0.001
	gnl|UG|Ta#S15902621	41586	1	347	-	508	570	-	409	3e-08
	gnl|UG|Ta#S15902621	41586	1	509	-	637	172	-	44	7e-06
2	gnl|UG|Ta#S15902984	220016	0.98	17	*	85	811	-	880	0.07
	gnl|UG|Ta#S15902984	127096	0.97	537	*	677	147	-	287	6e-06
2	gnl|UG|Ta#S16057815	36773	1	8	*	204	321	-	517	2e-10
	gnl|UG|Ta#S16057815	160657	1	973	*	1437	465	-	1	00:00:00
2	gnl|UG|Ta#S16057890	43710	0.98	637	*	833	427	-	623	3e-09
	gnl|UG|Ta#S16057890	75776	1	961	*	1041	670	-	590	0.001
3	gnl|UG|Ta#S16057897	20766	0.98	436	*	623	33	-	220	3e-09
	gnl|UG|Ta#S16057897	71856	0.97	1539	*	1633	1	-	95	0.0003
	gnl|UG|Ta#S16057897	8649	1	1631	-	1774	194	-	51	9e-07
2	gnl|UG|Ta#S16057908	12412	0.98	20	*	103	494	-	411	0.005
	gnl|UG|Ta#S16057908	12412	1	191	*	279	99	-	11	0.0002
	gnl|UG|Ta#S16057908	56244	1	487	*	573	1018	-	932	0.0002
	gnl|UG|Ta#S16057908	56244	0.98	570	-	707	856	-	719	2e-06
3	gnl|UG|Ta#S16057917	12694	0.98	8	-	114	191	-	298	0.0001
	gnl|UG|Ta#S16057917	72695	1	105	-	215	1584	-	1694	3e-05
	gnl|UG|Ta#S16057917	72695	1	214	-	335	1883	-	2004	2e-05
	gnl|UG|Ta#S16057917	133755	1	332	-	431	55	-	154	0.0004
	gnl|UG|Ta#S16057917	133755	0.97	422	-	1251	430	-	1261	00:00:00
2	gnl|UG|Ta#S16057948	30421	1	135	*	438	306	-	3	4e-16
	gnl|UG|Ta#S16057948	141903	1	632	*	854	1	-	223	4e-11
2	gnl|UG|Ta#S16057949	33143	0.99	371	-	473	168	-	66	0.0001
	gnl|UG|Ta#S16057949	147021	0.98	470	-	561	412	-	321	0.0001
7	gnl|UG|Ta#S16057969	203044	1	143	-	493	1	-	351	00:00:00
	gnl|UG|Ta#S16057969	203044	1	492	*	586	689	-	783	0.0002
	gnl|UG|Ta#S16057969	156349	1	740	*	854	184	-	70	1e-05
	gnl|UG|Ta#S16057969	342408	1	852	-	927	76	-	1	0.007
	gnl|UG|Ta#S16057969	156351	1	932	-	1076	148	-	4	3e-07
	gnl|UG|Ta#S16057969	156350	0.98	1074	-	1161	80	-	166	0.002
	gnl|UG|Ta#S16057969	71439	0.99	1155	-	1265	22	-	131	4e-05
	gnl|UG|Ta#S16057969	71439	1	1258	-	1446	863	-	1051	1e-09
	gnl|UG|Ta#S16057969	210768	0.99	1443	-	1938	563	-	69	00:00:00
2	gnl|UG|Ta#S16058013	164108	1	221	*	338	1	-	118	1e-05
	gnl|UG|Ta#S16058013	19766	1	513	*	963	121	-	571	00:00:00
5	gnl|UG|Ta#S16058039	193857	1	24	-	85	245	-	184	0.03
	gnl|UG|Ta#S16058039	193857	1	83	-	171	99	-	11	0.0003
	gnl|UG|Ta#S16058039	343449	1	167	-	342	179	-	354	1e-08
	gnl|UG|Ta#S16058039	170962	1	341	-	516	224	-	399	1e-08
	gnl|UG|Ta#S16058039	170962	1	516	-	618	471	-	573	0.0004
	gnl|UG|Ta#S16058039	170962	1	617	-	729	664	-	776	1e-05
	gnl|UG|Ta#S16058039	170962	0.98	723	*	810	1226	-	1312	0.002
	gnl|UG|Ta#S16058039	168452	1	988	*	1315	328	-	1	3e-17
	gnl|UG|Ta#S16058039	168453	1	1320	-	1501	18	-	199	5e-09
2	gnl|UG|Ta#S16058055	168191	0.98	366	*	854	1	-	492	00:00:00
	gnl|UG|Ta#S16058055	168190	0.98	1377	*	1758	1	-	384	00:00:00
4	gnl|UG|Ta#S16058102	169583	0.98	160	*	210	531	-	481	0.2
	gnl|UG|Ta#S16058102	4785	0.98	755	*	864	318	-	427	0.0001
	gnl|UG|Ta#S16058102	36064	0.98	928	*	991	473	-	410	0.01
	gnl|UG|Ta#S16058102	36064	0.98	988	*	1118	268	-	138	3e-06
	gnl|UG|Ta#S16058102	163732	0.97	1160	*	1279	2033	-	1914	2e-05
	gnl|UG|Ta#S16058102	163732	0.98	1555	*	1631	1034	-	958	0.007
2	gnl|UG|Ta#S16058107	142380	0.97	630	-	738	158	-	266	0.0002
	gnl|UG|Ta#S16058107	338546	0.98	736	-	823	91	-	179	0.004
3	gnl|UG|Ta#S16058146	120375	0.99	8	-	486	3294	-	3772	00:00:00
	gnl|UG|Ta#S16058146	274744	0.99	487	*	1646	1160	-	1	00:00:00
	gnl|UG|Ta#S16058146	10365	0.98	1702	*	1752	578	-	528	0.2
5	gnl|UG|Ta#S16058193	32422	0.98	428	-	478	159	-	209	0.2
	gnl|UG|Ta#S16058193	338318	0.97	479	-	618	90	-	229	7e-06
	gnl|UG|Ta#S16058193	167138	0.98	619	-	688	1	-	70	0.06
	gnl|UG|Ta#S16058193	167138	0.97	685	*	861	143	-	319	9e-08
	gnl|UG|Ta#S16058193	17068	0.98	928	*	1047	56	-	174	2e-05
	gnl|UG|Ta#S16058193	17068	0.97	1045	-	1159	265	-	379	1e-05
	gnl|UG|Ta#S16058193	17068	0.98	1159	-	1287	468	-	596	4e-06
	gnl|UG|Ta#S16058193	17068	0.98	1283	*	1459	683	-	859	4e-08
	gnl|UG|Ta#S16058193	70579	0.98	1505	*	1575	1	-	71	0.02
	gnl|UG|Ta#S16058193	70579	0.98	1573	-	1763	168	-	358	7e-09
5	gnl|UG|Ta#S16058223	143129	0.98	179	-	229	232	-	182	0.2
	gnl|UG|Ta#S16058223	143129	1	227	*	297	71	-	1	0.003
	gnl|UG|Ta#S16058223	143125	0.98	413	*	473	110	-	170	0.05
	gnl|UG|Ta#S16058223	143128	0.98	504	*	555	1	-	52	0.5
	gnl|UG|Ta#S16058223	143128	1	550	-	602	137	-	189	0.03
	gnl|UG|Ta#S16058223	143128	1	600	-	678	280	-	358	0.001
	gnl|UG|Ta#S16058223	143128	0.98	676	*	750	530	-	604	0.008
	gnl|UG|Ta#S16058223	235912	0.98	954	*	1008	208	-	262	0.01
	gnl|UG|Ta#S16058223	235912	1	1007	-	1083	331	-	407	0.001
	gnl|UG|Ta#S16058223	235912	1	1081	-	1139	483	-	541	0.01
	gnl|UG|Ta#S16058223	143123	0.98	1139	*	1223	1207	-	1123	0.002
	gnl|UG|Ta#S16058223	143123	0.97	1321	*	1428	818	-	711	0.0008
	gnl|UG|Ta#S16058223	143123	0.97	1426	-	1500	613	-	539	0.004
2	gnl|UG|Ta#S16058358	42592	0.99	17	-	389	714	-	343	00:00:00
	gnl|UG|Ta#S16058358	42592	0.99	390	*	614	225	-	1	2e-11
	gnl|UG|Ta#S16058358	63764	0.98	998	*	1153	597	-	443	8e-07
3	gnl|UG|Ta#S16058378	10850	0.97	9	-	144	481	-	616	6e-06
	gnl|UG|Ta#S16058378	10850	1	145	*	217	713	-	785	0.001
	gnl|UG|Ta#S16058378	70533	1	407	*	471	438	-	374	0.04
	gnl|UG|Ta#S16058378	70533	0.99	470	*	712	243	-	1	2e-12
	gnl|UG|Ta#S16058378	139398	0.97	774	*	892	781	-	663	4e-05
4	gnl|UG|Ta#S16058379	204823	1	9	-	66	379	-	322	0.04
	gnl|UG|Ta#S16058379	12540	0.98	66	-	333	340	-	604	9e-13
	gnl|UG|Ta#S16058379	25129	1	331	*	454	250	-	127	7e-06
	gnl|UG|Ta#S16058379	32176	1	523	*	667	75	-	219	2e-07
	gnl|UG|Ta#S16058379	32176	0.99	666	-	1351	401	-	1087	00:00:00
7	gnl|UG|Ta#S16058445	51875	0.98	1	-	90	414	-	325	0.0004
	gnl|UG|Ta#S16058445	51875	1	91	*	147	210	-	154	0.02
	gnl|UG|Ta#S16058445	149767	1	497	*	633	47	-	183	7e-06
	gnl|UG|Ta#S16058445	286290	1	632	-	694	984	-	922	0.09
	gnl|UG|Ta#S16058445	286290	1	693	-	820	771	-	644	7e-06
	gnl|UG|Ta#S16058445	64731	1	817	*	883	361	-	427	0.06
	gnl|UG|Ta#S16058445	145158	1	1098	*	1195	104	-	201	0.0003
	gnl|UG|Ta#S16058445	145157	1	1246	*	1373	144	-	271	7e-06
	gnl|UG|Ta#S16058445	154792	0.97	1585	*	1677	472	-	564	0.0004
2	gnl|UG|Ta#S16058472	281185	1	959	-	1050	382	-	473	0.0005
	gnl|UG|Ta#S16058472	253170	1	1046	-	1117	574	-	503	0.007
	gnl|UG|Ta#S16058472	253170	0.98	1115	-	1515	399	-	1	00:00:00
3	gnl|UG|Ta#S16195021	210403	0.97	1	*	96	96	-	1	0.0003
	gnl|UG|Ta#S16195021	210403	0.97	1	*	96	96	-	1	0.0003
	gnl|UG|Ta#S16195021	237233	1	97	-	213	1	-	117	3e-05
	gnl|UG|Ta#S16195021	296966	0.99	214	-	371	158	-	1	2e-07
2	gnl|UG|Ta#S16197538	172795	0.99	11	*	132	122	-	1	2e-05
	gnl|UG|Ta#S16197538	168491	0.98	173	*	402	14	-	243	3e-11
	gnl|UG|Ta#S16197538	168491	0.98	396	-	556	343	-	503	2e-07
3	gnl|UG|Ta#S16208722	18951	1	37	-	101	334	-	270	0.02
	gnl|UG|Ta#S16208722	18951	1	102	-	160	163	-	105	0.05
	gnl|UG|Ta#S16208722	30674	1	158	-	218	347	-	407	0.04
	gnl|UG|Ta#S16208722	30674	1	216	-	290	1729	-	1803	0.006
	gnl|UG|Ta#S16208722	30674	1	290	-	380	1989	-	2079	0.0008
	gnl|UG|Ta#S16208722	16920	1	378	-	458	7	-	87	0.003
2	gnl|UG|Ta#S16210195	271506	0.97	463	*	571	110	-	2	0.0008
	gnl|UG|Ta#S16210195	333878	1	628	*	708	1	-	81	0.003
2	gnl|UG|Ta#S16223211	151045	1	12	*	114	330	-	432	0.0002
	gnl|UG|Ta#S16223211	63902	0.99	220	*	399	424	-	245	1e-09
2	gnl|UG|Ta#S16226535	46579	1	4	*	98	813	-	907	0.0004
	gnl|UG|Ta#S16226535	198480	0.97	326	*	471	146	-	1	2e-06
2	gnl|UG|Ta#S16228967	155370	1	61	*	198	1	-	138	7e-06
	gnl|UG|Ta#S16228967	44202	1	365	*	519	1	-	155	2e-07
	gnl|UG|Ta#S16228967	44202	0.99	515	-	759	185	-	427	2e-12
2	gnl|UG|Ta#S16232697	32456	1	12	-	130	138	-	256	2e-05
	gnl|UG|Ta#S16232697	62488	0.97	130	-	206	341	-	417	0.001
2	gnl|UG|Ta#S16233682	46903	0.98	17	*	75	59	-	1	0.02
	gnl|UG|Ta#S16233682	77327	0.97	392	*	665	1	-	274	2e-13
2	gnl|UG|Ta#S16235494	153999	1	422	-	540	1	-	119	3e-05
	gnl|UG|Ta#S16235494	154000	0.98	538	-	806	473	-	205	1e-13
2	gnl|UG|Ta#S16238461	223180	1	72	-	380	1	-	309	6e-16
	gnl|UG|Ta#S16238461	223180	1	377	*	471	378	-	472	0.0006
	gnl|UG|Ta#S16238461	30987	0.97	602	*	809	453	-	246	2e-09
4	gnl|UG|Ta#S16248422	168891	1	43	*	123	81	-	1	0.003
	gnl|UG|Ta#S16248422	168890	0.99	142	*	244	103	-	1	0.0009
	gnl|UG|Ta#S16248422	18375	1	378	*	444	119	-	185	0.02
	gnl|UG|Ta#S16248422	18375	1	442	-	532	260	-	350	0.0009
	gnl|UG|Ta#S16248422	161789	1	527	-	629	110	-	8	0.0002
2	gnl|UG|Ta#S16255221	70417	1	1	*	163	163	-	1	8e-08
	gnl|UG|Ta#S16255221	218325	1	248	*	315	409	-	342	0.005
	gnl|UG|Ta#S16255221	218325	1	313	-	392	129	-	50	0.001
2	gnl|UG|Ta#S16255717	50430	1	1	-	89	791	-	879	0.0007
	gnl|UG|Ta#S16255717	45799	1	87	-	447	310	-	670	00:00:00
2	gnl|UG|Ta#S16256477	160562	0.97	277	*	370	174	-	81	0.0004
	gnl|UG|Ta#S16256477	160557	0.98	409	*	556	1	-	148	4e-07
2	gnl|UG|Ta#S16259908	35243	0.97	35	*	213	139	-	317	5e-08
	gnl|UG|Ta#S16259908	25928	0.97	593	*	696	758	-	653	0.0001
2	gnl|UG|Ta#S16261860	11267	0.99	1	-	269	557	-	826	4e-14
	gnl|UG|Ta#S16261860	36021	1	270	-	322	1	-	53	0.01
	gnl|UG|Ta#S16261860	36021	1	321	-	404	140	-	223	0.006
2	gnl|UG|Ta#S16465505	45411	0.99	30	-	212	184	-	1	3e-09
	gnl|UG|Ta#S16465505	185980	1	219	-	648	430	-	1	00:00:00
2	gnl|UG|Ta#S16465546	193406	0.98	320	-	443	306	-	429	9e-05
	gnl|UG|Ta#S16465546	193407	0.98	444	-	504	1	-	61	0.02
	gnl|UG|Ta#S16465546	193407	0.98	507	-	767	320	-	580	3e-13
2	gnl|UG|Ta#S16466240	172702	1	12	-	469	1388	-	931	00:00:00
	gnl|UG|Ta#S16466240	172702	1	468	-	586	190	-	72	2e-05
	gnl|UG|Ta#S16466240	194159	1	584	-	662	130	-	208	0.004
2	gnl|UG|Ta#S17878520	169988	0.98	241	*	313	89	-	18	0.002
	gnl|UG|Ta#S17878520	32703	0.98	346	*	472	1175	-	1049	2e-05
	gnl|UG|Ta#S17878520	32703	0.98	472	-	587	972	-	857	3e-05
2	gnl|UG|Ta#S17878543	188017	0.98	144	-	324	181	-	1	9e-08
	gnl|UG|Ta#S17878543	48667	0.99	325	-	535	644	-	434	4e-10
2	gnl|UG|Ta#S17878914	69061	1	149	*	206	566	-	623	0.02
	gnl|UG|Ta#S17878914	43271	1	506	*	681	1	-	176	6e-09
2	gnl|UG|Ta#S17881690	10754	0.98	444	-	498	158	-	104	0.05
	gnl|UG|Ta#S17881690	149190	0.98	498	-	563	124	-	59	0.04
2	gnl|UG|Ta#S17883008	62253	1	405	-	463	1212	-	1270	0.06
	gnl|UG|Ta#S17883008	62253	0.99	461	-	594	1510	-	1643	6e-06
	gnl|UG|Ta#S17883008	62253	1	588	*	657	1716	-	1785	0.005
	gnl|UG|Ta#S17883008	185483	1	825	*	875	116	-	166	0.02
2	gnl|UG|Ta#S17885682	128330	0.98	165	*	374	262	-	471	8e-10
	gnl|UG|Ta#S17885682	148939	0.98	471	*	534	105	-	41	0.05
2	gnl|UG|Ta#S17886360	65732	0.99	192	-	446	144	-	398	2e-13
	gnl|UG|Ta#S17886360	200216	1	447	-	576	130	-	1	2e-06
2	gnl|UG|Ta#S17887267	342768	0.98	167	*	240	1	-	74	0.001
	gnl|UG|Ta#S17887267	63240	1	261	*	359	531	-	433	0.0004
3	gnl|UG|Ta#S17887960	148932	0.98	211	*	263	1054	-	1106	0.08
	gnl|UG|Ta#S17887960	191261	0.99	273	*	373	276	-	176	0.0002
	gnl|UG|Ta#S17887960	82084	1	449	*	568	1	-	120	1e-05
2	gnl|UG|Ta#S17887975	23250	0.97	96	-	429	334	-	1	2e-16
	gnl|UG|Ta#S17887975	174929	0.98	430	-	630	448	-	247	4e-09
2	gnl|UG|Ta#S17888034	46538	0.99	253	*	504	1	-	251	3e-12
	gnl|UG|Ta#S17888034	33035	0.97	627	*	959	504	-	173	6e-16
2	gnl|UG|Ta#S17888080	55059	0.98	409	*	459	317	-	367	0.1
	gnl|UG|Ta#S17888080	38401	1	525	*	626	264	-	365	0.0001
	gnl|UG|Ta#S17888080	38401	1	625	-	697	835	-	907	0.001
2	gnl|UG|Ta#S17888110	184329	0.98	27	*	225	414	-	613	4e-09
	gnl|UG|Ta#S17888110	36796	0.99	237	*	819	212	-	794	00:00:00
	gnl|UG|Ta#S17888110	36796	0.98	811	-	861	871	-	921	0.1
2	gnl|UG|Ta#S17888153	178035	1	467	-	531	87	-	23	0.04
	gnl|UG|Ta#S17888153	181750	0.98	534	-	654	1243	-	1123	6e-05
2	gnl|UG|Ta#S17888218	31335	0.98	301	-	566	171	-	436	7e-13
	gnl|UG|Ta#S17888218	184095	0.98	565	-	624	60	-	1	0.01
4	gnl|UG|Ta#S17888249	36399	0.99	92	*	196	1429	-	1325	0.0001
	gnl|UG|Ta#S17888249	36399	0.98	335	*	391	384	-	328	0.05
	gnl|UG|Ta#S17888249	170092	1	387	-	460	28	-	101	0.004
	gnl|UG|Ta#S17888249	170092	0.98	460	-	527	848	-	915	0.04
	gnl|UG|Ta#S17888249	338505	1	527	-	594	276	-	209	0.008
	gnl|UG|Ta#S17888249	166928	0.99	593	-	718	313	-	438	2e-06
2	gnl|UG|Ta#S17888272	32405	0.97	6	-	414	409	-	1	00:00:00
	gnl|UG|Ta#S17888272	168434	0.99	415	-	733	321	-	3	2e-16
3	gnl|UG|Ta#S17888293	13993	1	111	*	180	297	-	366	0.006
	gnl|UG|Ta#S17888293	162727	1	299	*	423	937	-	813	2e-06
	gnl|UG|Ta#S17888293	162727	0.98	413	*	524	452	-	343	2e-05
	gnl|UG|Ta#S17888293	162727	1	519	-	762	244	-	1	1e-12
	gnl|UG|Ta#S17888293	69709	0.97	763	-	998	996	-	760	3e-11
3	gnl|UG|Ta#S17888452	162156	0.98	125	*	245	670	-	791	6e-05
	gnl|UG|Ta#S17888452	54157	0.99	405	*	516	307	-	196	1e-05
	gnl|UG|Ta#S17888452	54157	0.99	511	-	616	108	-	4	0.0001
	gnl|UG|Ta#S17888452	74482	0.97	610	-	741	193	-	323	8e-06
2	gnl|UG|Ta#S17888529	64916	1	405	*	482	918	-	841	0.002
	gnl|UG|Ta#S17888529	22068	0.97	679	*	786	2379	-	2272	0.0005
2	gnl|UG|Ta#S17888559	174211	0.99	32	-	134	119	-	221	0.0001
	gnl|UG|Ta#S17888559	174211	0.98	135	*	197	464	-	526	0.02
	gnl|UG|Ta#S17888559	57440	0.98	224	*	310	1	-	87	0.001
2	gnl|UG|Ta#S17888648	29097	1	307	-	366	1311	-	1252	0.02
	gnl|UG|Ta#S17888648	29097	1	365	*	466	263	-	162	0.0001
	gnl|UG|Ta#S17888648	201609	1	571	*	697	916	-	790	1e-06
	gnl|UG|Ta#S17888648	201609	0.97	831	*	908	440	-	363	0.005
2	gnl|UG|Ta#S17888756	40831	0.98	61	*	127	272	-	207	0.05
	gnl|UG|Ta#S17888756	133057	0.97	189	*	504	632	-	947	3e-15
3	gnl|UG|Ta#S17888794	30347	1	367	-	504	316	-	453	1e-06
	gnl|UG|Ta#S17888794	177732	1	505	*	573	230	-	162	0.002
	gnl|UG|Ta#S17888794	135094	1	690	*	795	610	-	715	6e-05
2	gnl|UG|Ta#S17888938	160993	0.97	244	-	422	163	-	341	3e-08
	gnl|UG|Ta#S17888938	161000	0.98	423	-	494	1	-	72	0.002
3	gnl|UG|Ta#S17888960	22381	0.98	372	*	482	196	-	87	8e-05
	gnl|UG|Ta#S17888960	62082	1	607	*	707	352	-	452	0.0004
	gnl|UG|Ta#S17888960	48858	0.97	759	*	861	600	-	499	0.0001
2	gnl|UG|Ta#S17889055	64546	0.99	286	*	426	360	-	500	9e-06
	gnl|UG|Ta#S17889055	129677	0.99	603	*	757	367	-	213	1e-07
2	gnl|UG|Ta#S17889275	148291	0.97	365	-	564	1	-	200	3e-09
	gnl|UG|Ta#S17889275	148296	0.97	566	-	802	280	-	40	3e-11
2	gnl|UG|Ta#S17889323	63541	1	68	-	201	470	-	337	1e-06
	gnl|UG|Ta#S17889323	63541	0.99	193	-	347	244	-	91	5e-07
	gnl|UG|Ta#S17889323	12456	0.98	343	-	440	149	-	52	0.0007
2	gnl|UG|Ta#S17889650	144740	0.98	18	-	161	496	-	353	9e-06
	gnl|UG|Ta#S17889650	144740	1	159	*	262	104	-	1	7e-05
	gnl|UG|Ta#S17889650	61430	0.99	301	*	433	302	-	170	3e-06
2	gnl|UG|Ta#S17889772	77074	1	128	*	241	1	-	114	2e-05
	gnl|UG|Ta#S17889772	33342	0.98	361	*	448	278	-	364	0.001
	gnl|UG|Ta#S17889772	33342	1	439	-	559	436	-	556	3e-05
2	gnl|UG|Ta#S17889967	187663	1	115	*	248	348	-	215	2e-06
	gnl|UG|Ta#S17889967	148375	1	260	*	345	117	-	32	0.0008
2	gnl|UG|Ta#S17889983	149083	1	524	-	591	215	-	148	0.008
	gnl|UG|Ta#S17889983	314552	0.97	586	-	721	75	-	209	5e-06
2	gnl|UG|Ta#S17890031	31406	0.98	70	-	237	311	-	478	5e-08
	gnl|UG|Ta#S17890031	183365	0.97	238	-	333	340	-	245	0.0005
	gnl|UG|Ta#S17890031	183365	0.98	331	-	408	78	-	1	0.001
2	gnl|UG|Ta#S17890149	165755	1	560	*	658	189	-	287	0.0005
	gnl|UG|Ta#S17890149	165754	1	670	*	745	114	-	39	0.003
2	gnl|UG|Ta#S17890243	60631	1	355	-	479	647	-	771	2e-06
	gnl|UG|Ta#S17890243	57633	0.97	479	-	1022	254	-	799	00:00:00
2	gnl|UG|Ta#S17890284	161111	0.98	428	-	512	121	-	37	0.001
	gnl|UG|Ta#S17890284	161109	0.97	513	-	648	384	-	249	1e-06
2	gnl|UG|Ta#S17890376	59116	1	174	*	227	120	-	67	0.04
	gnl|UG|Ta#S17890376	5392	0.98	437	*	516	436	-	515	0.007
	gnl|UG|Ta#S17890376	5392	1	516	-	577	632	-	693	0.02
	gnl|UG|Ta#S17890376	5392	1	574	-	631	894	-	951	0.03
3	gnl|UG|Ta#S17890832	186890	0.97	96	*	416	536	-	217	7e-15
	gnl|UG|Ta#S17890832	186890	0.97	96	*	416	536	-	217	7e-15
	gnl|UG|Ta#S17890832	174384	0.98	416	-	669	300	-	48	2e-12
	gnl|UG|Ta#S17890832	342874	0.97	666	-	791	1	-	126	5e-05
2	gnl|UG|Ta#S17890892	28679	0.99	20	*	138	320	-	437	6e-05
	gnl|UG|Ta#S17890892	193063	1	345	*	395	1895	-	1845	0.02
	gnl|UG|Ta#S17890892	193063	0.99	393	-	637	1021	-	777	2e-12
3	gnl|UG|Ta#S17892696	34206	0.99	96	-	575	509	-	30	00:00:00
	gnl|UG|Ta#S17892696	50914	1	575	-	762	119	-	306	2e-09
	gnl|UG|Ta#S17892696	50914	1	760	-	835	418	-	493	0.003
	gnl|UG|Ta#S17892696	22552	0.98	829	-	947	587	-	468	8e-05
3	gnl|UG|Ta#S17893022	144140	1	126	-	199	530	-	603	0.004
	gnl|UG|Ta#S17893022	144141	1	198	*	272	23	-	97	0.001
	gnl|UG|Ta#S17893022	62998	1	384	*	459	1141	-	1066	0.003
	gnl|UG|Ta#S17893022	62998	1	384	*	459	1141	-	1066	0.003
	gnl|UG|Ta#S17893022	62998	0.97	449	*	593	975	-	833	2e-06
	gnl|UG|Ta#S17893022	62998	0.97	449	*	593	975	-	833	2e-06
	gnl|UG|Ta#S17893022	62998	1	585	*	653	765	-	697	0.002
	gnl|UG|Ta#S17893022	62998	1	585	*	653	765	-	697	0.002
3	gnl|UG|Ta#S17893274	211800	0.98	80	-	244	28	-	192	2e-08
	gnl|UG|Ta#S17893274	211802	0.99	245	-	382	139	-	2	5e-06
	gnl|UG|Ta#S17893274	229393	0.98	385	-	694	1	-	309	4e-15
3	gnl|UG|Ta#S17893534	22856	1	389	-	473	1	-	85	0.003
	gnl|UG|Ta#S17893534	36175	1	472	-	559	18	-	105	0.0007
	gnl|UG|Ta#S17893534	36175	1	558	-	654	223	-	319	0.0007
	gnl|UG|Ta#S17893534	36175	1	650	*	793	412	-	555	5e-07
	gnl|UG|Ta#S17893534	182533	0.98	806	*	854	205	-	254	0.2
2	gnl|UG|Ta#S17893707	160276	0.99	512	-	649	1	-	138	5e-06
	gnl|UG|Ta#S17893707	160275	1	650	-	778	129	-	1	1e-06
2	gnl|UG|Ta#S17893728	70479	1	348	-	500	182	-	30	5e-07
	gnl|UG|Ta#S17893728	173136	1	498	-	572	476	-	550	0.001
2	gnl|UG|Ta#S17893931	279486	0.97	85	-	156	70	-	1	0.04
	gnl|UG|Ta#S17893931	90467	0.99	157	*	576	419	-	1	00:00:00
	gnl|UG|Ta#S17893931	90467	0.99	157	*	576	419	-	1	00:00:00
2	gnl|UG|Ta#S17893985	53247	0.98	537	-	651	1033	-	920	5e-05
	gnl|UG|Ta#S17893985	53247	0.99	651	-	778	796	-	669	2e-06
	gnl|UG|Ta#S17893985	31519	0.97	787	-	959	651	-	479	8e-08
2	gnl|UG|Ta#S17894559	284365	0.97	442	-	532	91	-	1	0.003
	gnl|UG|Ta#S17894559	186512	0.98	533	-	620	1	-	88	0.003
2	gnl|UG|Ta#S17894675	235494	0.98	345	-	580	1	-	235	6e-11
	gnl|UG|Ta#S17894675	253210	0.97	581	-	838	1	-	255	1e-12
2	gnl|UG|Ta#S17894682	187906	1	77	-	138	476	-	415	0.02
	gnl|UG|Ta#S17894682	187906	1	139	-	266	289	-	162	4e-06
	gnl|UG|Ta#S17894682	187906	1	264	*	323	60	-	1	0.02
	gnl|UG|Ta#S17894682	177253	0.99	338	*	668	333	-	3	4e-17
3	gnl|UG|Ta#S17894841	9819	1	85	-	277	98	-	290	3e-09
	gnl|UG|Ta#S17894841	9819	0.99	274	-	394	371	-	491	1e-05
	gnl|UG|Ta#S17894841	40232	1	393	-	530	415	-	278	1e-06
	gnl|UG|Ta#S17894841	40232	1	528	-	656	191	-	63	1e-06
	gnl|UG|Ta#S17894841	164812	1	654	-	757	36	-	139	8e-05
2	gnl|UG|Ta#S17894871	43256	0.97	497	*	571	697	-	623	0.002
	gnl|UG|Ta#S17894871	56454	0.97	659	*	829	63	-	234	2e-08
2	gnl|UG|Ta#S17894976	59765	0.97	91	-	169	267	-	189	0.001
	gnl|UG|Ta#S17894976	59765	1	168	*	261	94	-	1	0.0003
	gnl|UG|Ta#S17894976	148055	0.98	489	*	611	568	-	446	5e-05
	gnl|UG|Ta#S17894976	148055	0.98	489	*	611	568	-	446	5e-05
	gnl|UG|Ta#S17894976	148055	0.97	611	*	800	295	-	106	6e-09
	gnl|UG|Ta#S17894976	148055	0.97	611	*	800	295	-	106	6e-09
2	gnl|UG|Ta#S17895806	35775	1	143	-	270	567	-	694	3e-06
	gnl|UG|Ta#S17895806	35775	0.99	270	-	487	1048	-	1265	1e-11
	gnl|UG|Ta#S17895806	44437	0.98	493	-	865	515	-	141	00:00:00
2	gnl|UG|Ta#S17897408	66978	0.97	208	*	284	361	-	437	0.002
	gnl|UG|Ta#S17897408	41628	0.98	613	*	772	1	-	160	6e-07
4	gnl|UG|Ta#S17897417	175511	0.97	75	*	247	261	-	434	2e-08
	gnl|UG|Ta#S17897417	43283	0.99	269	*	471	1	-	203	4e-10
	gnl|UG|Ta#S17897417	43283	0.97	466	*	550	297	-	381	0.006
	gnl|UG|Ta#S17897417	53010	0.98	640	*	755	187	-	302	4e-05
	gnl|UG|Ta#S17897417	304950	0.98	797	*	877	81	-	1	0.006
2	gnl|UG|Ta#S17897747	291337	1	189	-	367	179	-	1	2e-09
	gnl|UG|Ta#S17897747	182650	0.99	368	-	593	226	-	1	3e-11
2	gnl|UG|Ta#S17898184	48272	0.99	86	*	188	397	-	498	0.0005
	gnl|UG|Ta#S17898184	145991	0.97	779	*	877	107	-	9	0.0001
2	gnl|UG|Ta#S17898740	324741	0.98	426	-	507	102	-	21	0.007
	gnl|UG|Ta#S17898740	90461	0.98	506	-	597	45	-	136	0.0002
	gnl|UG|Ta#S17898740	90461	0.98	599	-	655	228	-	284	0.05
2	gnl|UG|Ta#S17898853	91821	1	80	*	436	631	-	987	00:00:00
	gnl|UG|Ta#S17898853	90467	0.99	457	*	876	419	-	1	00:00:00
	gnl|UG|Ta#S17898853	90467	0.99	457	*	876	419	-	1	00:00:00
2	gnl|UG|Ta#S17972151	154833	1	115	*	181	276	-	342	0.02
	gnl|UG|Ta#S17972151	154833	1	115	*	181	276	-	342	0.02
	gnl|UG|Ta#S17972151	154832	0.98	266	*	410	334	-	189	2e-06
	gnl|UG|Ta#S17972151	154832	0.97	409	-	475	100	-	34	0.05
2	gnl|UG|Ta#S17972306	138053	0.99	175	*	408	235	-	1	1e-12
	gnl|UG|Ta#S17972306	6389	0.98	426	*	593	1024	-	858	1e-08
2	gnl|UG|Ta#S17973849	55634	0.98	113	*	202	411	-	499	0.0006
	gnl|UG|Ta#S17973849	63560	0.98	360	*	549	73	-	262	9e-09
2	gnl|UG|Ta#S17974068	117245	1	135	-	390	743	-	488	2e-13
	gnl|UG|Ta#S17974068	117245	1	389	*	485	381	-	285	0.0004
	gnl|UG|Ta#S17974068	37410	1	580	*	670	93	-	3	0.0001
2	gnl|UG|Ta#S17976413	165737	1	112	*	222	368	-	478	7e-05
	gnl|UG|Ta#S17976413	41426	1	331	*	463	471	-	339	4e-06
	gnl|UG|Ta#S17976413	41426	0.98	460	-	722	264	-	1	3e-13
2	gnl|UG|Ta#S17977393	43526	1	112	-	308	950	-	754	1e-10
	gnl|UG|Ta#S17977393	43526	1	306	-	511	410	-	205	1e-10
	gnl|UG|Ta#S17977393	43526	1	506	-	562	118	-	62	0.08
	gnl|UG|Ta#S17977393	239783	1	561	-	647	89	-	3	0.0002
2	gnl|UG|Ta#S17978500	11002	1	326	*	434	591	-	483	9e-05
	gnl|UG|Ta#S17978500	46184	1	465	*	521	1	-	57	0.08
2	gnl|UG|Ta#S17980069	138284	1	130	-	188	59	-	1	0.06
	gnl|UG|Ta#S17980069	138283	0.99	189	-	503	1	-	316	3e-16
2	gnl|UG|Ta#S17980795	341497	0.98	150	*	203	38	-	91	0.02
	gnl|UG|Ta#S17980795	125414	1	294	*	363	43	-	112	0.004
2	gnl|UG|Ta#S17980818	13008	0.97	130	*	269	138	-	1	2e-06
	gnl|UG|Ta#S17980818	30892	0.98	494	*	599	504	-	609	0.0001
2	gnl|UG|Ta#S17981080	161838	1	135	*	423	300	-	12	9e-15
	gnl|UG|Ta#S17981080	157486	0.98	621	*	736	145	-	260	8e-05
2	gnl|UG|Ta#S17983069	148545	1	191	*	290	159	-	60	0.0001
	gnl|UG|Ta#S17983069	48083	1	415	*	508	286	-	379	0.0002
2	gnl|UG|Ta#S17984467	301926	1	425	*	495	181	-	251	0.002
	gnl|UG|Ta#S17984467	58316	0.98	558	*	630	578	-	506	0.006
3	gnl|UG|Ta#S17984493	34381	0.97	28	-	151	124	-	1	6e-05
	gnl|UG|Ta#S17984493	168745	1	152	-	333	194	-	13	3e-09
	gnl|UG|Ta#S17984493	168746	1	332	-	440	1	-	109	1e-05
2	gnl|UG|Ta#S17984558	38250	1	255	-	399	428	-	284	1e-07
	gnl|UG|Ta#S17984558	38250	0.99	396	-	512	205	-	89	2e-05
	gnl|UG|Ta#S17984558	190646	1	510	-	616	107	-	1	2e-05
2	gnl|UG|Ta#S17984576	42335	0.97	20	*	273	2084	-	2335	5e-12
	gnl|UG|Ta#S17984576	12116	0.98	741	*	794	503	-	450	0.06
2	gnl|UG|Ta#S17984691	179584	0.98	48	-	183	237	-	103	1e-06
	gnl|UG|Ta#S17984691	27258	1	179	-	391	1356	-	1144	2e-11
	gnl|UG|Ta#S17984691	27258	0.99	383	-	724	1052	-	712	3e-17
3	gnl|UG|Ta#S17984774	11878	0.99	139	*	245	789	-	895	8e-05
	gnl|UG|Ta#S17984774	107407	0.99	418	*	537	449	-	568	5e-05
	gnl|UG|Ta#S17984774	101272	0.98	685	*	809	348	-	224	3e-05
2	gnl|UG|Ta#S17984779	163349	0.98	47	*	244	282	-	85	4e-09
	gnl|UG|Ta#S17984779	33690	0.98	575	*	914	509	-	171	4e-17
4	gnl|UG|Ta#S17984904	31262	0.98	45	-	109	310	-	374	0.02
	gnl|UG|Ta#S17984904	166786	0.99	110	-	213	21	-	124	0.0004
	gnl|UG|Ta#S17984904	166786	0.99	208	-	312	285	-	389	0.0001
	gnl|UG|Ta#S17984904	338588	1	311	-	391	191	-	111	0.005
	gnl|UG|Ta#S17984904	87728	1	390	-	564	881	-	707	3e-08
	gnl|UG|Ta#S17984904	87728	1	563	-	644	631	-	550	0.001
	gnl|UG|Ta#S17984904	87728	0.99	645	-	859	418	-	204	7e-11
	gnl|UG|Ta#S17984904	87728	0.98	855	-	906	97	-	46	0.3
2	gnl|UG|Ta#S17985000	58500	1	17	*	464	448	-	1	00:00:00
	gnl|UG|Ta#S17985000	154690	0.98	617	*	812	196	-	1	1e-09
2	gnl|UG|Ta#S17985558	72774	1	369	-	420	194	-	245	0.06
	gnl|UG|Ta#S17985558	72774	0.98	419	-	606	391	-	578	2e-09
	gnl|UG|Ta#S17985558	16494	0.98	606	-	855	62	-	311	1e-12
2	gnl|UG|Ta#S17985597	33293	1	11	-	74	405	-	468	0.01
	gnl|UG|Ta#S17985597	33293	1	73	*	164	566	-	657	0.0004
	gnl|UG|Ta#S17985597	175698	1	232	*	446	1283	-	1069	2e-11
	gnl|UG|Ta#S17985597	175698	0.97	442	-	994	637	-	82	00:00:00
3	gnl|UG|Ta#S17985831	36111	0.98	460	-	528	90	-	158	0.01
	gnl|UG|Ta#S17985831	13418	0.98	523	-	585	795	-	733	0.02
	gnl|UG|Ta#S17985831	13418	0.98	584	-	652	625	-	557	0.01
	gnl|UG|Ta#S17985831	343024	1	649	-	778	255	-	126	3e-06
2	gnl|UG|Ta#S17985882	175753	0.98	27	*	88	62	-	1	0.08
	gnl|UG|Ta#S17985882	135068	0.99	243	*	778	536	-	1	00:00:00
2	gnl|UG|Ta#S17985940	186890	0.97	24	*	113	90	-	1	0.001
	gnl|UG|Ta#S17985940	186890	0.97	24	*	113	90	-	1	0.001
	gnl|UG|Ta#S17985940	174383	0.98	322	*	709	1172	-	785	00:00:00
2	gnl|UG|Ta#S17985976	75165	0.99	41	*	398	1	-	357	00:00:00
	gnl|UG|Ta#S17985976	10692	1	436	*	603	1299	-	1132	2e-08
	gnl|UG|Ta#S17985976	10692	1	603	-	696	1038	-	945	0.0003
2	gnl|UG|Ta#S17986065	198536	0.98	326	*	411	1	-	86	0.004
	gnl|UG|Ta#S17986065	142048	0.97	579	*	690	153	-	42	0.0003
2	gnl|UG|Ta#S17986345	69206	1	132	*	221	116	-	27	0.0005
	gnl|UG|Ta#S17986345	139932	1	288	*	348	2930	-	2870	0.06
	gnl|UG|Ta#S17986345	139932	1	347	-	449	2717	-	2615	0.0003
	gnl|UG|Ta#S17986345	139932	1	446	-	536	1484	-	1394	0.0001
	gnl|UG|Ta#S17986345	139932	1	535	-	614	748	-	669	0.002
	gnl|UG|Ta#S17986345	139932	1	614	-	748	578	-	444	4e-06
2	gnl|UG|Ta#S17986666	38757	0.98	36	-	364	1249	-	921	3e-16
	gnl|UG|Ta#S17986666	38757	1	363	-	479	634	-	518	5e-05
	gnl|UG|Ta#S17986666	38757	0.98	478	*	556	305	-	227	0.003
	gnl|UG|Ta#S17986666	72409	0.97	592	*	939	1	-	351	1e-17
3	gnl|UG|Ta#S17986741	208240	1	140	*	200	39	-	99	0.06
	gnl|UG|Ta#S17986741	208238	0.98	286	*	473	188	-	1	2e-09
	gnl|UG|Ta#S17986741	56937	0.99	474	-	772	562	-	264	7e-15
2	gnl|UG|Ta#S17986752	63003	1	243	-	326	20	-	103	0.001
	gnl|UG|Ta#S17986752	63003	1	325	-	416	185	-	276	0.0004
	gnl|UG|Ta#S17986752	63003	1	416	*	490	404	-	478	0.001
	gnl|UG|Ta#S17986752	240349	0.98	551	*	634	133	-	216	0.005
	gnl|UG|Ta#S17986752	240349	0.98	633	-	827	301	-	495	2e-09
3	gnl|UG|Ta#S17986851	152351	1	8	*	123	384	-	269	2e-05
	gnl|UG|Ta#S17986851	152351	1	8	*	123	384	-	269	2e-05
	gnl|UG|Ta#S17986851	47713	1	163	*	251	323	-	235	0.0002
	gnl|UG|Ta#S17986851	47713	1	251	*	323	134	-	62	0.001
	gnl|UG|Ta#S17986851	166302	1	515	*	575	469	-	409	0.06
	gnl|UG|Ta#S17986851	166302	0.98	575	-	875	302	-	1	7e-15
2	gnl|UG|Ta#S17987014	48519	0.99	50	*	549	500	-	1	00:00:00
	gnl|UG|Ta#S17987014	152005	0.98	575	*	869	766	-	472	1e-14
2	gnl|UG|Ta#S17987042	5163	0.98	81	*	151	93	-	163	0.008
	gnl|UG|Ta#S17987042	163341	0.97	650	*	744	209	-	115	0.0002
3	gnl|UG|Ta#S17987326	32754	1	76	-	151	451	-	526	0.003
	gnl|UG|Ta#S17987326	185526	0.98	152	-	488	335	-	1	2e-17
	gnl|UG|Ta#S17987326	166638	1	489	-	547	1	-	59	0.08
	gnl|UG|Ta#S17987326	166638	1	546	-	595	534	-	583	0.08
2	gnl|UG|Ta#S17987539	15729	1	136	-	216	384	-	304	0.005
	gnl|UG|Ta#S17987539	15729	0.99	209	*	323	115	-	1	3e-05
	gnl|UG|Ta#S17987539	139634	1	333	*	411	237	-	315	0.006
	gnl|UG|Ta#S17987539	139634	1	410	-	476	401	-	467	0.03
	gnl|UG|Ta#S17987539	139634	1	475	-	527	724	-	776	0.02
	gnl|UG|Ta#S17987539	139634	0.98	526	-	580	851	-	905	0.06
2	gnl|UG|Ta#S17987584	36994	0.97	30	*	141	114	-	4	0.0001
	gnl|UG|Ta#S17987584	28100	0.97	328	*	455	224	-	98	1e-05
2	gnl|UG|Ta#S17987659	207722	0.98	270	*	357	88	-	1	0.003
	gnl|UG|Ta#S17987659	185395	0.98	680	*	799	120	-	1	2e-05
2	gnl|UG|Ta#S17987927	263133	1	128	*	185	58	-	1	0.03
	gnl|UG|Ta#S17987927	45181	0.97	216	*	799	213	-	797	00:00:00
2	gnl|UG|Ta#S17987941	41232	0.98	349	*	506	530	-	687	2e-07
	gnl|UG|Ta#S17987941	20154	0.97	535	*	672	150	-	287	1e-06
2	gnl|UG|Ta#S17988121	175251	0.99	56	-	371	655	-	970	2e-16
	gnl|UG|Ta#S17988121	175250	0.98	369	-	451	1047	-	965	0.002
	gnl|UG|Ta#S17988121	175250	0.97	448	-	945	895	-	397	00:00:00
2	gnl|UG|Ta#S17988303	165947	1	150	-	504	1	-	355	00:00:00
	gnl|UG|Ta#S17988303	20741	0.99	505	-	856	1	-	351	00:00:00
2	gnl|UG|Ta#S17988507	183793	1	104	-	207	281	-	178	8e-05
	gnl|UG|Ta#S17988507	183793	1	207	*	285	96	-	18	0.006
	gnl|UG|Ta#S17988507	173754	1	565	*	646	161	-	80	0.001
2	gnl|UG|Ta#S17988699	72263	0.99	347	*	511	325	-	488	2e-08
	gnl|UG|Ta#S17988699	54566	0.98	583	*	707	390	-	515	4e-05
2	gnl|UG|Ta#S17988830	161416	0.98	24	-	326	778	-	475	4e-15
	gnl|UG|Ta#S17988830	13341	1	327	-	550	360	-	583	1e-11
	gnl|UG|Ta#S17988830	13341	0.98	550	-	638	680	-	768	0.0007
	gnl|UG|Ta#S17988830	13341	0.98	631	-	932	1044	-	1345	3e-15
2	gnl|UG|Ta#S17989154	55857	0.98	124	*	562	1	-	439	00:00:00
	gnl|UG|Ta#S17989154	148055	0.97	602	*	713	184	-	295	0.0003
	gnl|UG|Ta#S17989154	148055	0.97	602	*	713	184	-	295	0.0003
	gnl|UG|Ta#S17989154	148055	0.97	713	*	835	446	-	568	2e-05
	gnl|UG|Ta#S17989154	148055	0.97	713	*	835	446	-	568	2e-05
2	gnl|UG|Ta#S17989158	1783	0.99	49	*	381	764	-	1096	2e-17
	gnl|UG|Ta#S17989158	5697	0.97	798	*	893	2973	-	3067	0.0002
2	gnl|UG|Ta#S17989198	16477	0.99	26	-	396	788	-	418	00:00:00
	gnl|UG|Ta#S17989198	16477	1	395	*	535	290	-	150	2e-07
	gnl|UG|Ta#S17989198	24437	0.97	805	*	945	140	-	1	4e-06
2	gnl|UG|Ta#S17989312	154227	0.98	415	-	512	153	-	250	0.0008
	gnl|UG|Ta#S17989312	29155	1	514	-	581	897	-	830	0.008
2	gnl|UG|Ta#S17989327	158692	0.97	121	-	353	177	-	409	2e-11
	gnl|UG|Ta#S17989327	158692	0.97	351	-	472	784	-	905	8e-05
	gnl|UG|Ta#S17989327	158692	0.98	468	-	567	1413	-	1512	0.0003
	gnl|UG|Ta#S17989327	57216	0.99	566	-	679	114	-	1	1e-05
3	gnl|UG|Ta#S17989373	64372	1	121	*	211	777	-	867	0.0001
	gnl|UG|Ta#S17989373	141330	0.98	332	*	418	87	-	1	0.001
	gnl|UG|Ta#S17989373	7596	0.98	419	-	630	727	-	516	7e-10
3	gnl|UG|Ta#S17989457	167040	0.98	121	*	326	206	-	1	7e-10
	gnl|UG|Ta#S17989457	54026	0.97	340	*	522	542	-	360	2e-08
	gnl|UG|Ta#S17989457	52082	1	552	*	651	1	-	100	0.0001
	gnl|UG|Ta#S17989457	52082	0.98	650	-	756	216	-	322	0.0004
2	gnl|UG|Ta#S17989883	46396	0.97	714	-	831	665	-	548	4e-05
	gnl|UG|Ta#S17989883	8694	0.97	829	-	915	463	-	548	0.002
2	gnl|UG|Ta#S17989890	153281	0.98	175	-	502	328	-	1	5e-16
	gnl|UG|Ta#S17989890	153282	0.98	503	-	602	310	-	211	0.0003
3	gnl|UG|Ta#S17989899	189101	0.99	7	-	249	211	-	452	7e-12
	gnl|UG|Ta#S17989899	71305	1	248	-	299	73	-	124	0.06
	gnl|UG|Ta#S17989899	71305	1	298	-	507	229	-	438	9e-10
	gnl|UG|Ta#S17989899	71305	0.98	507	*	570	645	-	708	0.06
	gnl|UG|Ta#S17989899	36585	1	629	*	682	54	-	1	0.05
2	gnl|UG|Ta#S17990017	59714	1	32	-	378	347	-	1	00:00:00
	gnl|UG|Ta#S17990017	192328	1	379	-	556	1	-	178	6e-09
2	gnl|UG|Ta#S18006076	136591	1	164	-	276	1	-	113	8e-05
	gnl|UG|Ta#S18006076	8247	0.99	285	-	459	226	-	399	4e-08
	gnl|UG|Ta#S18006076	8247	0.98	458	-	546	494	-	582	0.0008
3	gnl|UG|Ta#S18006170	146412	1	232	*	316	497	-	413	0.003
	gnl|UG|Ta#S18006170	146409	0.97	445	*	556	506	-	617	0.0003
	gnl|UG|Ta#S18006170	146410	0.97	657	*	744	184	-	271	0.001
2	gnl|UG|Ta#S18006189	174000	1	113	*	225	325	-	213	8e-05
	gnl|UG|Ta#S18006189	18552	1	366	*	503	667	-	530	1e-06
	gnl|UG|Ta#S18006189	18552	0.98	500	-	730	309	-	79	1e-11
2	gnl|UG|Ta#S18006218	13368	0.98	333	-	440	1482	-	1375	0.0001
	gnl|UG|Ta#S18006218	13368	0.97	438	-	529	1288	-	1197	0.0008
	gnl|UG|Ta#S18006218	13368	1	529	-	591	750	-	688	0.05
	gnl|UG|Ta#S18006218	59147	0.98	593	-	643	93	-	143	0.1
2	gnl|UG|Ta#S18006535	170999	1	352	*	470	207	-	89	3e-05
	gnl|UG|Ta#S18006535	170998	1	548	*	658	185	-	295	9e-05
2	gnl|UG|Ta#S18006553	257483	0.97	40	*	284	811	-	567	3e-11
	gnl|UG|Ta#S18006553	19100	1	301	*	413	226	-	114	7e-05
3	gnl|UG|Ta#S18006662	32704	0.97	26	-	310	446	-	162	9e-13
	gnl|UG|Ta#S18006662	28571	1	309	*	361	100	-	48	0.02
	gnl|UG|Ta#S18006662	19315	1	417	*	480	125	-	188	0.01
	gnl|UG|Ta#S18006662	19315	1	481	-	546	590	-	655	0.01
	gnl|UG|Ta#S18006662	19315	0.99	546	-	753	727	-	934	5e-10
2	gnl|UG|Ta#S18006914	19139	0.99	33	-	372	912	-	573	5e-17
	gnl|UG|Ta#S18006914	19139	1	370	-	484	486	-	372	6e-05
	gnl|UG|Ta#S18006914	19139	1	483	-	550	249	-	182	0.008
	gnl|UG|Ta#S18006914	139140	1	551	-	664	108	-	221	2e-05
	gnl|UG|Ta#S18006914	139140	0.98	660	-	757	302	-	399	0.0007
	gnl|UG|Ta#S18006914	139140	1	757	-	812	502	-	557	0.04
2	gnl|UG|Ta#S18007015	116451	0.98	112	-	271	364	-	524	6e-07
	gnl|UG|Ta#S18007015	206433	0.98	278	-	341	158	-	96	0.02
3	gnl|UG|Ta#S18008153	33535	0.98	67	-	221	470	-	624	3e-07
	gnl|UG|Ta#S18008153	148825	1	219	*	318	39	-	138	0.0001
	gnl|UG|Ta#S18008153	14390	0.97	484	*	767	453	-	735	5e-13
2	gnl|UG|Ta#S18009149	189199	0.97	39	*	246	678	-	885	1e-09
	gnl|UG|Ta#S18009149	140775	1	610	*	670	117	-	177	0.06
2	gnl|UG|Ta#S18009326	31328	0.98	35	*	416	391	-	11	00:00:00
	gnl|UG|Ta#S18009326	8605	0.97	734	*	823	177	-	266	0.001
3	gnl|UG|Ta#S18009889	19693	0.99	35	-	486	452	-	1	00:00:00
	gnl|UG|Ta#S18009889	154135	1	487	-	545	1	-	59	0.08
	gnl|UG|Ta#S18009889	154135	0.98	546	-	606	147	-	208	0.03
	gnl|UG|Ta#S18009889	147317	1	605	-	666	1321	-	1382	0.02
	gnl|UG|Ta#S18009889	147317	1	662	-	773	1482	-	1593	3e-05
3	gnl|UG|Ta#S18010178	51237	0.97	33	*	496	464	-	1	00:00:00
	gnl|UG|Ta#S18010178	31638	0.99	509	*	638	236	-	107	1e-06
	gnl|UG|Ta#S18010178	184425	1	636	-	825	292	-	103	1e-09
2	gnl|UG|Ta#S18010804	31491	0.98	268	-	432	354	-	190	1e-07
	gnl|UG|Ta#S18010804	31491	1	429	-	492	64	-	1	0.01
	gnl|UG|Ta#S18010804	184287	0.98	493	-	710	220	-	3	2e-10
3	gnl|UG|Ta#S18011328	234513	0.97	56	-	141	86	-	1	0.002
	gnl|UG|Ta#S18011328	47717	0.99	142	*	502	1	-	361	00:00:00
	gnl|UG|Ta#S18011328	30990	1	577	*	676	1037	-	938	0.0001
6	gnl|UG|Ta#S18943252	28900	0.98	387	-	557	659	-	829	3e-08
	gnl|UG|Ta#S18943252	203881	0.98	557	-	649	161	-	69	0.0001
	gnl|UG|Ta#S18943252	55657	1	646	-	829	127	-	310	7e-09
	gnl|UG|Ta#S18943252	55657	0.98	827	-	913	443	-	530	0.003
	gnl|UG|Ta#S18943252	50344	1	910	-	1042	371	-	239	2e-06
	gnl|UG|Ta#S18943252	50344	0.98	1037	*	1198	163	-	1	3e-07
	gnl|UG|Ta#S18943252	194561	0.97	1866	*	2089	241	-	18	4e-10
	gnl|UG|Ta#S18943252	13762	0.97	2089	-	2286	54	-	251	3e-09
	gnl|UG|Ta#S18943252	13762	0.98	2284	-	2532	478	-	726	6e-12
	gnl|UG|Ta#S18943252	13762	1	2529	-	2632	846	-	949	0.0002
	gnl|UG|Ta#S18943252	13762	0.99	2631	-	3129	1214	-	1712	00:00:00
4	gnl|UG|Ta#S19116911	43048	1	1	-	295	295	-	1	3e-15
	gnl|UG|Ta#S19116911	159278	0.99	296	-	505	254	-	46	4e-10
	gnl|UG|Ta#S19116911	177679	1	504	-	557	37	-	90	0.03
	gnl|UG|Ta#S19116911	177678	1	556	-	624	86	-	154	0.001
2	gnl|UG|Ta#S21008544	119701	0.97	311	*	413	151	-	49	0.0004
	gnl|UG|Ta#S21008544	359286	0.97	481	*	562	1	-	83	0.001
2	gnl|UG|Ta#S22364706	170258	0.98	108	-	205	520	-	617	0.0006
	gnl|UG|Ta#S22364706	19435	1	204	-	396	791	-	599	2e-09
	gnl|UG|Ta#S22364706	19435	0.97	395	-	850	512	-	61	00:00:00
2	gnl|UG|Ta#S22365773	69014	0.97	603	*	670	68	-	1	0.01
	gnl|UG|Ta#S22365773	176542	1	687	*	782	87	-	182	0.0002
2	gnl|UG|Ta#S22366836	59687	0.98	366	-	433	579	-	511	0.03
	gnl|UG|Ta#S22366836	182677	0.99	427	-	570	185	-	327	6e-07
2	gnl|UG|Ta#S22367179	193887	0.98	179	-	255	651	-	574	0.003
	gnl|UG|Ta#S22367179	193887	1	252	-	353	473	-	372	0.0007
	gnl|UG|Ta#S22367179	193887	1	353	-	419	284	-	218	0.02
	gnl|UG|Ta#S22367179	193887	1	420	*	518	147	-	49	0.0003
	gnl|UG|Ta#S22367179	184560	1	580	*	674	2	-	96	0.0006
3	gnl|UG|Ta#S22368101	20840	0.98	145	-	225	1306	-	1227	0.006
	gnl|UG|Ta#S22368101	20840	0.98	225	-	308	985	-	902	0.004
	gnl|UG|Ta#S22368101	20840	0.98	306	*	365	828	-	769	0.08
	gnl|UG|Ta#S22368101	68169	0.99	465	*	582	1170	-	1287	5e-05
	gnl|UG|Ta#S22368101	31806	1	619	*	718	356	-	257	0.0001
	gnl|UG|Ta#S22368101	31806	1	714	-	781	68	-	1	0.006
2	gnl|UG|Ta#S22368384	167243	0.98	107	*	237	642	-	512	1e-06
	gnl|UG|Ta#S22368384	167244	1	439	*	567	10	-	138	7e-06
	gnl|UG|Ta#S22368384	167244	0.98	765	*	826	665	-	726	0.06
2	gnl|UG|Ta#S22368989	149718	1	104	*	231	151	-	24	3e-06
	gnl|UG|Ta#S22368989	149714	1	348	*	472	588	-	464	1e-06
	gnl|UG|Ta#S22368989	149714	0.99	470	-	714	358	-	113	5e-12
2	gnl|UG|Ta#S22369432	215220	0.97	143	*	234	261	-	170	0.0006
	gnl|UG|Ta#S22369432	156991	0.97	364	*	574	214	-	3	2e-09
3	gnl|UG|Ta#S22369444	58916	0.97	109	*	239	110	-	240	6e-06
	gnl|UG|Ta#S22369444	170677	0.97	322	*	581	1	-	260	5e-12
	gnl|UG|Ta#S22369444	170675	0.98	633	*	714	178	-	259	0.005
2	gnl|UG|Ta#S22369754	299077	1	108	-	193	19	-	104	0.0006
	gnl|UG|Ta#S22369754	138262	1	194	-	275	393	-	312	0.001
2	gnl|UG|Ta#S22370297	34382	0.99	107	-	436	1338	-	1008	3e-17
	gnl|UG|Ta#S22370297	34382	1	431	*	568	284	-	147	7e-06
	gnl|UG|Ta#S22370297	104151	0.98	650	*	707	2	-	58	0.04
2	gnl|UG|Ta#S22370534	142111	0.98	419	*	476	57	-	1	0.04
	gnl|UG|Ta#S22370534	142112	0.98	663	*	730	149	-	82	0.03
2	gnl|UG|Ta#S22370902	168136	0.97	108	*	173	909	-	975	0.02
	gnl|UG|Ta#S22370902	119184	0.98	294	*	600	350	-	45	3e-15
2	gnl|UG|Ta#S22371101	36951	0.98	110	*	288	814	-	635	3e-08
	gnl|UG|Ta#S22371101	146865	0.97	469	*	558	840	-	751	0.007
	gnl|UG|Ta#S22371101	146865	1	554	-	691	261	-	124	7e-06
3	gnl|UG|Ta#S22371224	201543	0.99	108	*	231	220	-	343	2e-05
	gnl|UG|Ta#S22371224	171261	0.97	320	*	442	835	-	957	2e-05
	gnl|UG|Ta#S22371224	75349	0.98	477	*	570	495	-	587	0.0003
2	gnl|UG|Ta#S22371270	149422	0.97	108	*	182	688	-	613	0.002
	gnl|UG|Ta#S22371270	149423	0.98	312	*	616	324	-	22	2e-15
3	gnl|UG|Ta#S22372132	55889	0.98	254	*	449	131	-	326	9e-09
	gnl|UG|Ta#S22372132	154834	0.97	471	*	568	98	-	1	0.0003
	gnl|UG|Ta#S22372132	154833	1	627	*	678	88	-	139	0.05
	gnl|UG|Ta#S22372132	154833	1	627	*	678	88	-	139	0.05
	gnl|UG|Ta#S22372132	154833	0.98	679	*	790	231	-	342	4e-05
	gnl|UG|Ta#S22372132	154833	0.98	679	*	790	231	-	342	4e-05
2	gnl|UG|Ta#S22373909	75664	1	89	-	172	260	-	343	0.008
	gnl|UG|Ta#S22373909	75664	0.99	169	-	294	524	-	649	2e-06
	gnl|UG|Ta#S22373909	27060	1	297	*	346	1004	-	955	0.06
	gnl|UG|Ta#S22373909	27060	0.97	458	*	600	642	-	500	6e-06
4	gnl|UG|Ta#S22377710	157436	1	107	*	237	485	-	615	6e-06
	gnl|UG|Ta#S22377710	361935	1	279	*	347	1	-	69	0.002
	gnl|UG|Ta#S22377710	354905	1	360	*	485	211	-	86	3e-06
	gnl|UG|Ta#S22377710	168887	1	577	*	641	208	-	144	0.03
2	gnl|UG|Ta#S22378223	167544	1	216	-	322	175	-	69	2e-05
	gnl|UG|Ta#S22378223	167543	0.98	320	-	473	380	-	227	3e-07
2	gnl|UG|Ta#S22378427	58367	0.99	369	*	468	216	-	315	0.0005
	gnl|UG|Ta#S22378427	66141	0.97	559	*	675	1064	-	948	4e-05
2	gnl|UG|Ta#S22378484	152350	1	123	*	234	145	-	256	2e-05
	gnl|UG|Ta#S22378484	152351	0.98	430	*	490	1842	-	1782	0.02
	gnl|UG|Ta#S22378484	152351	0.98	430	*	490	1842	-	1782	0.02
	gnl|UG|Ta#S22378484	152351	1	490	*	565	1674	-	1599	0.002
	gnl|UG|Ta#S22378484	152351	1	490	*	565	1674	-	1599	0.002
3	gnl|UG|Ta#S22380042	55364	1	107	-	201	95	-	1	0.0006
	gnl|UG|Ta#S22380042	206746	1	202	*	727	526	-	1	00:00:00
	gnl|UG|Ta#S22380042	55363	0.97	715	*	819	106	-	1	0.0002
2	gnl|UG|Ta#S22380832	147776	0.98	112	-	194	131	-	49	0.001
	gnl|UG|Ta#S22380832	147774	1	191	-	272	1464	-	1383	0.001
	gnl|UG|Ta#S22380832	147774	1	270	-	436	1127	-	961	6e-08
2	gnl|UG|Ta#S22381400	19470	0.98	446	-	504	77	-	19	0.03
	gnl|UG|Ta#S22381400	19471	0.98	505	*	588	108	-	191	0.003
	gnl|UG|Ta#S22381400	19471	0.98	505	*	588	108	-	191	0.003
2	gnl|UG|Ta#S22382790	146230	0.99	154	-	263	150	-	259	1e-05
	gnl|UG|Ta#S22382790	53271	0.97	263	-	343	301	-	381	0.007
2	gnl|UG|Ta#S22383203	169255	1	396	*	465	609	-	540	0.005
	gnl|UG|Ta#S22383203	30008	0.97	551	*	628	34	-	110	0.004
3	gnl|UG|Ta#S22383924	341565	0.98	198	-	361	164	-	1	6e-08
	gnl|UG|Ta#S22383924	168545	0.99	362	-	462	101	-	1	0.0001
	gnl|UG|Ta#S22383924	168546	0.97	463	-	598	137	-	1	5e-06
2	gnl|UG|Ta#S22385502	85060	1	153	*	312	1	-	160	4e-08
	gnl|UG|Ta#S22385502	205715	1	341	*	560	220	-	1	2e-11
2	gnl|UG|Ta#S22386273	151861	1	111	*	222	285	-	174	2e-05
	gnl|UG|Ta#S22386273	173814	0.98	241	*	526	964	-	1248	1e-14
2	gnl|UG|Ta#S22388403	33531	1	105	*	166	459	-	520	0.01
	gnl|UG|Ta#S22388403	158998	0.98	464	*	673	523	-	314	7e-10
3	gnl|UG|Ta#S22388419	58752	0.98	102	-	215	541	-	428	3e-05
	gnl|UG|Ta#S22388419	213959	0.97	212	*	567	356	-	1	1e-17
	gnl|UG|Ta#S22388419	156196	0.97	593	*	684	153	-	245	0.0006
4	gnl|UG|Ta#S22388790	49257	1	110	-	199	90	-	1	0.0004
	gnl|UG|Ta#S22388790	95174	0.98	200	-	278	1	-	78	0.008
	gnl|UG|Ta#S22388790	95173	0.99	276	*	448	132	-	304	1e-08
	gnl|UG|Ta#S22388790	53236	0.98	535	*	639	725	-	621	0.0003
2	gnl|UG|Ta#S22389199	39384	1	120	-	403	304	-	587	5e-15
	gnl|UG|Ta#S22389199	39384	0.99	400	-	510	707	-	818	3e-05
	gnl|UG|Ta#S22389199	191755	1	519	-	582	165	-	228	0.01
3	gnl|UG|Ta#S22389499	4454	1	183	-	314	606	-	475	2e-06
	gnl|UG|Ta#S22389499	150830	1	312	-	558	247	-	1	2e-12
	gnl|UG|Ta#S22389499	150829	1	559	-	747	545	-	357	4e-09
2	gnl|UG|Ta#S22390834	93699	1	90	*	356	282	-	16	1e-14
	gnl|UG|Ta#S22390834	93699	1	90	*	356	282	-	16	1e-14
	gnl|UG|Ta#S22390834	149224	0.98	354	-	702	144	-	490	1e-17
2	gnl|UG|Ta#S22390928	160973	1	175	-	350	98	-	273	5e-09
	gnl|UG|Ta#S22390928	62213	0.98	346	-	603	1173	-	916	9e-12
6	gnl|UG|Ta#S22839345	22146	1	272	-	362	744	-	834	0.0003
	gnl|UG|Ta#S22839345	22146	1	360	*	537	953	-	1130	1e-09
	gnl|UG|Ta#S22839345	143127	1	771	*	885	58	-	172	1e-05
	gnl|UG|Ta#S22839345	143127	1	884	-	952	482	-	550	0.005
	gnl|UG|Ta#S22839345	143127	0.98	953	-	1027	1067	-	1141	0.001
	gnl|UG|Ta#S22839345	2489	1	1022	-	1121	625	-	526	0.0003
	gnl|UG|Ta#S22839345	2489	1	1120	-	1301	451	-	270	8e-09
	gnl|UG|Ta#S22839345	51630	1	1299	-	1512	332	-	119	1e-11
	gnl|UG|Ta#S22839345	32455	1	1511	*	1751	241	-	1	1e-12
	gnl|UG|Ta#S22839345	185294	1	1776	*	1833	270	-	327	0.07
5	gnl|UG|Ta#S22944981	146146	0.98	25	*	87	1	-	62	0.09
	gnl|UG|Ta#S22944981	146144	0.99	142	*	398	257	-	1	4e-13
	gnl|UG|Ta#S22944981	146143	0.99	399	*	525	432	-	305	7e-06
	gnl|UG|Ta#S22944981	146145	1	558	*	614	749	-	693	0.01
	gnl|UG|Ta#S22944981	3988	0.99	613	-	918	534	-	839	5e-15
	gnl|UG|Ta#S22944981	3988	0.98	917	-	972	1023	-	1077	0.07
2	gnl|UG|Ta#S24513199	56894	0.98	109	*	267	737	-	894	7e-07
	gnl|UG|Ta#S24513199	177157	0.97	312	*	455	211	-	68	2e-06
2	gnl|UG|Ta#S24513477	19825	0.98	56	*	214	159	-	1	4e-07
	gnl|UG|Ta#S24513477	60170	0.99	574	*	700	1068	-	942	5e-06
3	gnl|UG|Ta#S24623093	65820	0.98	65	-	121	58	-	115	0.05
	gnl|UG|Ta#S24623093	65820	0.98	116	*	210	230	-	323	0.0001
	gnl|UG|Ta#S24623093	16958	1	302	*	370	109	-	177	0.002
	gnl|UG|Ta#S24623093	16958	0.99	363	*	470	257	-	363	9e-05
	gnl|UG|Ta#S24623093	154278	0.98	529	*	922	836	-	444	00:00:00
2	gnl|UG|Ta#S24623122	52700	0.99	66	*	219	4	-	157	5e-07
	gnl|UG|Ta#S24623122	185545	1	376	*	478	234	-	336	0.0002
2	gnl|UG|Ta#S24623138	53274	0.99	64	-	372	330	-	22	3e-16
	gnl|UG|Ta#S24623138	168001	0.97	372	-	916	213	-	756	00:00:00
3	gnl|UG|Ta#S24623184	32286	0.99	160	*	308	254	-	106	4e-07
	gnl|UG|Ta#S24623184	56975	1	444	*	506	4	-	66	0.05
	gnl|UG|Ta#S24623184	56975	0.98	506	-	593	140	-	227	0.003
	gnl|UG|Ta#S24623184	56975	1	588	*	677	314	-	403	0.0005
	gnl|UG|Ta#S24623184	156722	0.98	791	*	883	733	-	641	0.0005
2	gnl|UG|Ta#S26019480	54707	0.97	182	-	472	8	-	298	7e-14
	gnl|UG|Ta#S26019480	76787	0.98	471	-	557	1724	-	1638	0.008
2	gnl|UG|Ta#S26022935	199931	0.99	150	*	387	255	-	492	1e-12
	gnl|UG|Ta#S26022935	21041	1	485	*	562	498	-	421	0.002
2	gnl|UG|Ta#S26022953	60144	1	20	*	113	426	-	519	0.0003
	gnl|UG|Ta#S26022953	179209	1	268	*	335	309	-	242	0.008
2	gnl|UG|Ta#S26023496	39097	0.98	230	*	401	661	-	833	3e-08
	gnl|UG|Ta#S26023496	38953	0.99	448	*	694	264	-	18	5e-12
2	gnl|UG|Ta#S26023499	72858	1	61	*	163	381	-	279	0.0003
	gnl|UG|Ta#S26023499	342752	0.97	448	*	810	1	-	362	6e-18
2	gnl|UG|Ta#S26023632	77099	1	402	*	481	103	-	182	0.002
	gnl|UG|Ta#S26023632	24149	0.98	773	*	827	567	-	512	0.06
2	gnl|UG|Ta#S26023900	71491	0.98	54	-	332	278	-	1	7e-14
	gnl|UG|Ta#S26023900	56818	0.99	333	-	435	103	-	1	0.0001
2	gnl|UG|Ta#S26023962	157148	0.99	72	*	227	530	-	685	4e-07
	gnl|UG|Ta#S26023962	31250	1	359	*	435	1374	-	1298	0.008
	gnl|UG|Ta#S26023962	31250	1	434	-	522	1139	-	1051	0.0002
	gnl|UG|Ta#S26023962	31250	0.99	523	-	638	926	-	811	7e-05
	gnl|UG|Ta#S26023962	31250	0.98	637	-	790	707	-	554	1e-07
3	gnl|UG|Ta#S26024113	52219	0.98	23	-	86	926	-	989	0.06
	gnl|UG|Ta#S26024113	52219	0.98	82	*	166	1182	-	1266	0.001
	gnl|UG|Ta#S26024113	83580	0.98	326	*	440	896	-	782	1e-05
	gnl|UG|Ta#S26024113	83580	1	439	-	488	106	-	57	0.08
	gnl|UG|Ta#S26024113	90944	0.98	487	-	539	19	-	71	0.08
4	gnl|UG|Ta#S26024130	20560	0.99	197	-	365	309	-	477	3e-08
	gnl|UG|Ta#S26024130	20560	0.98	366	-	447	570	-	651	0.006
	gnl|UG|Ta#S26024130	20560	1	449	-	510	758	-	819	0.02
	gnl|UG|Ta#S26024130	201618	0.97	508	-	617	309	-	199	0.0004
	gnl|UG|Ta#S26024130	186683	1	618	-	672	212	-	158	0.01
	gnl|UG|Ta#S26024130	186682	0.98	669	-	747	1161	-	1239	0.003
2	gnl|UG|Ta#S26024875	35617	0.99	434	-	542	248	-	356	5e-05
	gnl|UG|Ta#S26024875	66199	0.97	540	-	613	337	-	264	0.007
3	gnl|UG|Ta#S26024974	56165	0.98	361	-	454	94	-	1	0.0001
	gnl|UG|Ta#S26024974	287061	0.97	455	-	613	212	-	54	1e-07
	gnl|UG|Ta#S26024974	158261	0.97	610	-	717	20	-	127	0.0005
3	gnl|UG|Ta#S26025036	173977	1	63	*	330	330	-	63	5e-14
	gnl|UG|Ta#S26025036	303310	1	358	*	510	1	-	153	5e-07
	gnl|UG|Ta#S26025036	170510	0.99	511	-	802	1796	-	1505	3e-15
2	gnl|UG|Ta#S26026177	189147	0.98	433	*	543	211	-	101	2e-05
	gnl|UG|Ta#S26026177	189146	0.98	606	*	676	143	-	213	0.008
	gnl|UG|Ta#S26026177	189146	1	675	-	737	311	-	373	0.05
3	gnl|UG|Ta#S26026227	135406	0.97	405	*	609	862	-	1065	2e-09
	gnl|UG|Ta#S26026227	172559	0.98	818	*	870	54	-	1	0.08
	gnl|UG|Ta#S26026227	172559	0.98	818	*	870	54	-	1	0.08
2	gnl|UG|Ta#S26026242	59849	1	317	*	422	106	-	1	6e-05
	gnl|UG|Ta#S26026242	164135	0.97	434	*	503	883	-	815	0.05
	gnl|UG|Ta#S26026242	164135	0.98	495	-	575	712	-	632	0.002
2	gnl|UG|Ta#S26026478	54917	1	189	*	269	410	-	330	0.005
	gnl|UG|Ta#S26026478	54917	1	189	*	269	410	-	330	0.005
	gnl|UG|Ta#S26026478	54917	1	266	*	326	224	-	164	0.06
	gnl|UG|Ta#S26026478	54917	1	266	*	326	224	-	164	0.06
	gnl|UG|Ta#S26026478	48948	1	594	*	824	583	-	353	2e-12
2	gnl|UG|Ta#S26026506	17832	0.97	50	-	391	531	-	190	9e-16
	gnl|UG|Ta#S26026506	17832	0.97	390	*	472	91	-	9	0.008
	gnl|UG|Ta#S26026506	160936	0.97	540	*	726	112	-	298	3e-08
	gnl|UG|Ta#S26026506	160936	0.98	728	-	789	394	-	455	0.08
2	gnl|UG|Ta#S26026690	167833	0.98	4	*	260	380	-	635	5e-12
	gnl|UG|Ta#S26026690	139881	0.99	317	*	889	572	-	1144	00:00:00
4	gnl|UG|Ta#S26026753	166510	0.97	23	-	122	400	-	301	0.0001
	gnl|UG|Ta#S26026753	166510	0.97	116	-	245	230	-	102	1e-05
	gnl|UG|Ta#S26026753	179637	0.98	236	-	285	189	-	237	0.1
	gnl|UG|Ta#S26026753	343040	0.98	286	*	357	2	-	73	0.002
	gnl|UG|Ta#S26026753	46776	0.97	670	*	830	423	-	583	2e-07
2	gnl|UG|Ta#S26027019	176830	0.99	366	-	472	405	-	299	8e-05
	gnl|UG|Ta#S26027019	159121	0.98	472	-	808	1900	-	1564	2e-16
2	gnl|UG|Ta#S26027113	7132	0.98	13	*	235	223	-	1	5e-11
	gnl|UG|Ta#S26027113	4052	1	541	*	702	654	-	815	4e-08
5	gnl|UG|Ta#S26027124	176907	1	45	-	152	1	-	108	5e-05
	gnl|UG|Ta#S26027124	176908	1	152	-	248	153	-	249	0.0006
	gnl|UG|Ta#S26027124	2335	1	247	*	331	124	-	40	0.003
	gnl|UG|Ta#S26027124	142716	0.98	555	*	604	271	-	319	0.1
	gnl|UG|Ta#S26027124	142715	1	605	-	675	1	-	71	0.002
	gnl|UG|Ta#S26027124	142715	1	674	-	757	179	-	262	0.001
2	gnl|UG|Ta#S26027602	108098	0.98	134	*	278	243	-	99	3e-06
	gnl|UG|Ta#S26027602	106303	0.97	351	*	429	107	-	185	0.001
4	gnl|UG|Ta#S26027721	294090	0.97	21	*	190	475	-	644	8e-08
	gnl|UG|Ta#S26027721	111618	0.97	21	*	190	1653	-	1822	4e-07
	gnl|UG|Ta#S26027721	294090	0.98	187	-	491	768	-	1072	3e-15
	gnl|UG|Ta#S26027721	111126	0.99	492	-	591	100	-	1	0.0006
2	gnl|UG|Ta#S26027952	343527	0.99	77	*	276	200	-	1	7e-10
	gnl|UG|Ta#S26027952	59243	1	615	*	747	648	-	516	6e-06
2	gnl|UG|Ta#S26028021	66476	0.98	196	-	335	487	-	348	2e-06
	gnl|UG|Ta#S26028021	66476	0.97	334	*	426	158	-	66	0.0002
	gnl|UG|Ta#S26028021	202129	1	544	*	636	363	-	271	0.0001
3	gnl|UG|Ta#S26028044	154751	0.99	34	-	200	332	-	498	4e-08
	gnl|UG|Ta#S26028044	76022	0.99	200	-	327	200	-	74	6e-06
	gnl|UG|Ta#S26028044	189966	1	323	-	425	277	-	379	0.0003
2	gnl|UG|Ta#S26028135	25339	1	117	*	343	288	-	514	3e-11
	gnl|UG|Ta#S26028135	150286	0.99	446	*	881	463	-	28	00:00:00
3	gnl|UG|Ta#S26028286	146257	0.97	161	*	257	97	-	1	0.0001
	gnl|UG|Ta#S26028286	146260	0.97	375	*	582	206	-	1	4e-09
	gnl|UG|Ta#S26028286	146265	0.97	583	-	810	845	-	617	9e-10
3	gnl|UG|Ta#S26028387	117041	0.97	123	*	232	383	-	271	0.0001
	gnl|UG|Ta#S26028387	163754	0.97	313	*	444	76	-	207	2e-06
	gnl|UG|Ta#S26028387	14582	0.97	674	*	795	4	-	124	3e-05
3	gnl|UG|Ta#S26028482	145403	0.97	34	-	132	45	-	143	0.0001
	gnl|UG|Ta#S26028482	145403	0.99	130	*	271	221	-	362	3e-06
	gnl|UG|Ta#S26028482	39591	1	318	*	661	1	-	344	00:00:00
3	gnl|UG|Ta#S26028700	145018	0.98	19	-	85	715	-	781	0.01
	gnl|UG|Ta#S26028700	145018	0.98	85	-	320	868	-	1103	3e-11
	gnl|UG|Ta#S26028700	24318	1	321	-	472	592	-	441	2e-07
	gnl|UG|Ta#S26028700	33589	1	471	-	644	317	-	490	1e-08
3	gnl|UG|Ta#S26028882	176374	0.98	175	-	265	212	-	302	0.0006
	gnl|UG|Ta#S26028882	176374	1	262	*	327	607	-	672	0.01
	gnl|UG|Ta#S26028882	165357	1	568	*	629	247	-	186	0.02
	gnl|UG|Ta#S26028882	176492	0.99	627	-	747	191	-	71	1e-05
3	gnl|UG|Ta#S26028929	32996	0.98	290	*	362	507	-	579	0.006
	gnl|UG|Ta#S26028929	64423	1	377	*	450	97	-	170	0.004
	gnl|UG|Ta#S26028929	64423	0.98	450	*	522	250	-	322	0.006
	gnl|UG|Ta#S26028929	16395	0.98	630	*	823	746	-	939	7e-09
3	gnl|UG|Ta#S26028947	229897	1	104	*	221	234	-	351	1e-05
	gnl|UG|Ta#S26028947	174615	0.99	297	*	511	1047	-	833	7e-11
	gnl|UG|Ta#S26028947	174618	1	510	-	682	1232	-	1404	3e-08
2	gnl|UG|Ta#S26028978	39624	0.98	146	-	364	1	-	219	4e-10
	gnl|UG|Ta#S26028978	118697	0.98	363	-	441	2519	-	2441	0.003
	gnl|UG|Ta#S26028978	118697	0.99	438	-	542	2356	-	2252	0.0001
	gnl|UG|Ta#S26028978	118697	1	540	-	595	2153	-	2098	0.04
	gnl|UG|Ta#S26028978	118697	1	595	-	688	1993	-	1900	0.0003
	gnl|UG|Ta#S26028978	118697	1	687	-	781	1666	-	1572	0.0008
2	gnl|UG|Ta#S26029038	42051	0.98	59	-	336	673	-	396	7e-14
	gnl|UG|Ta#S26029038	144100	1	338	-	467	1	-	130	3e-06
2	gnl|UG|Ta#S26029095	206884	1	230	*	360	183	-	53	7e-06
	gnl|UG|Ta#S26029095	12698	0.99	561	*	783	822	-	601	4e-11
3	gnl|UG|Ta#S30065901	160247	0.99	168	*	295	357	-	485	3e-06
	gnl|UG|Ta#S30065901	160248	0.98	312	*	635	927	-	605	4e-16
	gnl|UG|Ta#S30065901	201746	0.98	774	*	861	405	-	493	0.006
2	gnl|UG|Ta#S31823487	59411	0.99	253	-	426	1	-	174	3e-08
	gnl|UG|Ta#S31823487	342362	1	427	-	564	1	-	138	6e-06
4	gnl|UG|Ta#S32424954	36591	1	1	*	332	332	-	1	1e-17
	gnl|UG|Ta#S32424954	71619	0.99	431	*	648	218	-	1	1e-11
	gnl|UG|Ta#S32424954	202904	1	675	*	732	489	-	546	0.02
	gnl|UG|Ta#S32424954	151261	1	733	-	809	1	-	77	0.006
3	gnl|UG|Ta#S32428508	56711	1	160	-	301	157	-	298	4e-07
	gnl|UG|Ta#S32428508	338497	1	300	-	353	101	-	154	0.04
	gnl|UG|Ta#S32428508	338497	1	352	*	444	225	-	317	0.0008
	gnl|UG|Ta#S32428508	60922	1	526	*	592	48	-	114	0.02
	gnl|UG|Ta#S32428508	60922	1	591	-	675	221	-	305	0.002
	gnl|UG|Ta#S32428508	60922	1	674	-	742	390	-	458	0.002
	gnl|UG|Ta#S32428508	60922	1	741	-	800	542	-	601	0.02
2	gnl|UG|Ta#S32428820	148869	0.97	289	*	359	1100	-	1170	0.03
	gnl|UG|Ta#S32428820	13032	0.97	479	*	545	1450	-	1384	0.05
	gnl|UG|Ta#S32428820	13032	0.97	543	-	642	1027	-	928	0.0001
2	gnl|UG|Ta#S32429027	184088	0.97	309	*	395	457	-	371	0.003
	gnl|UG|Ta#S32429027	181790	1	517	*	585	1899	-	1831	0.001
2	gnl|UG|Ta#S32429369	136559	0.98	1	-	180	1379	-	1201	1e-08
	gnl|UG|Ta#S32429369	136559	1	176	-	233	449	-	392	0.02
	gnl|UG|Ta#S32429369	9985	1	233	-	305	402	-	474	0.008
2	gnl|UG|Ta#S32431903	160588	1	348	*	431	124	-	41	0.007
	gnl|UG|Ta#S32431903	214578	0.97	616	*	730	1	-	115	1e-05
	gnl|UG|Ta#S32431903	214578	0.98	730	-	791	207	-	268	0.02
2	gnl|UG|Ta#S32434652	3102	1	1	*	314	616	-	929	1e-16
	gnl|UG|Ta#S32434652	48362	0.99	363	*	763	400	-	1	00:00:00
2	gnl|UG|Ta#S32435403	64476	0.97	1	*	393	41	-	436	00:00:00
	gnl|UG|Ta#S32435403	172607	0.97	518	*	601	187	-	269	0.007
2	gnl|UG|Ta#S32494347	149042	0.98	1	*	523	600	-	78	00:00:00
	gnl|UG|Ta#S32494347	39422	1	668	*	861	498	-	305	6e-10
2	gnl|UG|Ta#S32495943	126925	0.97	30	*	118	89	-	1	0.002
	gnl|UG|Ta#S32495943	77824	1	368	*	417	218	-	267	0.05
3	gnl|UG|Ta#S32496467	137077	1	3	-	222	1323	-	1542	2e-11
	gnl|UG|Ta#S32496467	137077	1	219	*	338	1633	-	1752	8e-05
	gnl|UG|Ta#S32496467	137075	0.98	219	*	338	811	-	930	2e-05
	gnl|UG|Ta#S32496467	137077	1	335	*	503	1822	-	1990	4e-08
	gnl|UG|Ta#S32496467	115055	1	638	*	737	242	-	341	0.0001
2	gnl|UG|Ta#S32497870	143002	0.97	1	*	398	626	-	225	00:00:00
	gnl|UG|Ta#S32497870	42480	0.99	589	*	698	1	-	110	1e-05
3	gnl|UG|Ta#S32500545	168079	1	1	-	91	91	-	1	0.0009
	gnl|UG|Ta#S32500545	168078	1	92	*	680	1	-	589	00:00:00
	gnl|UG|Ta#S32500545	338407	1	764	*	814	241	-	191	0.02
2	gnl|UG|Ta#S32506367	8888	0.97	75	*	148	74	-	1	0.006
	gnl|UG|Ta#S32506367	70408	0.97	206	*	405	1059	-	860	3e-09
	gnl|UG|Ta#S32506367	70408	0.98	524	*	683	559	-	400	4e-07
3	gnl|UG|Ta#S32507112	8210	1	23	-	197	201	-	375	2e-08
	gnl|UG|Ta#S32507112	8210	1	197	-	297	1053	-	1153	0.0003
	gnl|UG|Ta#S32507112	49845	0.97	298	*	362	364	-	430	0.02
	gnl|UG|Ta#S32507112	54917	1	691	*	771	410	-	330	0.003
	gnl|UG|Ta#S32507112	54917	1	691	*	771	410	-	330	0.003
2	gnl|UG|Ta#S32513848	14301	1	306	-	581	276	-	1	1e-14
	gnl|UG|Ta#S32513848	132737	0.98	582	-	862	349	-	72	3e-14
3	gnl|UG|Ta#S32514936	202588	0.98	70	-	126	133	-	189	0.03
	gnl|UG|Ta#S32514936	202587	0.98	127	*	250	125	-	1	9e-05
	gnl|UG|Ta#S32514936	54795	0.98	288	*	475	204	-	391	2e-09
	gnl|UG|Ta#S32514936	54795	0.97	475	-	569	485	-	579	0.0001
2	gnl|UG|Ta#S32517477	24246	0.98	347	-	420	332	-	259	0.001
	gnl|UG|Ta#S32517477	24246	0.97	418	*	500	94	-	12	0.006
	gnl|UG|Ta#S32517477	173567	0.97	597	*	708	289	-	400	0.0002
	gnl|UG|Ta#S32517477	173567	1	702	-	764	478	-	540	0.04
2	gnl|UG|Ta#S32521100	135855	0.97	10	*	171	290	-	452	2e-07
	gnl|UG|Ta#S32521100	213029	0.98	761	*	862	500	-	401	0.0006
2	gnl|UG|Ta#S32521377	122964	0.98	486	*	595	3644	-	3753	6e-05
	gnl|UG|Ta#S32521377	211425	0.98	747	*	803	57	-	113	0.04
3	gnl|UG|Ta#S32521538	159349	1	1	-	365	365	-	1	00:00:00
	gnl|UG|Ta#S32521538	170452	1	366	-	383	382	-	365	1
	gnl|UG|Ta#S32521538	170452	1	384	-	525	260	-	119	4e-07
	gnl|UG|Ta#S32521538	60656	1	524	-	618	1813	-	1719	0.0006
	gnl|UG|Ta#S32521538	60656	0.99	616	-	788	1094	-	921	1e-08
	gnl|UG|Ta#S32521538	60656	1	786	-	863	852	-	775	0.002
2	gnl|UG|Ta#S32522834	59208	0.98	3	*	117	1062	-	947	9e-05
	gnl|UG|Ta#S32522834	59208	0.98	301	*	351	122	-	72	0.7
	gnl|UG|Ta#S32522834	129098	1	301	*	351	3710	-	3660	0.02
2	gnl|UG|Ta#S32523271	38078	0.97	592	-	705	208	-	95	2e-05
	gnl|UG|Ta#S32523271	155879	1	700	-	766	33	-	99	0.02
3	gnl|UG|Ta#S32523897	42150	0.97	346	-	420	249	-	323	0.002
	gnl|UG|Ta#S32523897	124048	0.98	421	*	546	1	-	126	8e-05
	gnl|UG|Ta#S32523897	124047	0.99	584	*	691	104	-	211	2e-05
2	gnl|UG|Ta#S32524943	18719	1	139	-	251	45	-	157	6e-05
	gnl|UG|Ta#S32524943	18719	1	248	-	515	228	-	495	4e-14
	gnl|UG|Ta#S32524943	169282	1	516	-	621	1	-	106	4e-05
	gnl|UG|Ta#S32524943	169282	0.98	616	-	672	195	-	252	0.04
2	gnl|UG|Ta#S32526018	205630	1	35	*	180	146	-	1	3e-07
	gnl|UG|Ta#S32526018	188542	0.99	504	*	844	670	-	330	2e-17
2	gnl|UG|Ta#S32528865	41812	1	198	-	483	529	-	244	4e-15
	gnl|UG|Ta#S32528865	41812	1	480	-	607	172	-	45	3e-06
	gnl|UG|Ta#S32528865	105386	0.99	605	-	804	272	-	470	4e-10
2	gnl|UG|Ta#S32528938	139030	0.99	1	-	312	819	-	508	2e-16
	gnl|UG|Ta#S32528938	186423	1	309	-	563	301	-	555	4e-13
2	gnl|UG|Ta#S32530328	53948	0.97	1	-	102	623	-	522	0.0007
	gnl|UG|Ta#S32530328	53948	0.97	101	-	237	399	-	263	1e-06
	gnl|UG|Ta#S32530328	53948	0.99	235	*	365	131	-	1	3e-06
	gnl|UG|Ta#S32530328	170434	0.98	608	*	742	1	-	135	7e-06
	gnl|UG|Ta#S32530328	170434	1	739	-	822	210	-	293	0.007
3	gnl|UG|Ta#S32531074	36181	1	1	*	51	175	-	125	0.01
	gnl|UG|Ta#S32531074	36181	1	1	*	51	175	-	125	0.01
	gnl|UG|Ta#S32531074	167466	1	50	-	208	159	-	1	1e-08
	gnl|UG|Ta#S32531074	291436	1	209	-	483	275	-	1	4e-14
3	gnl|UG|Ta#S32535299	62998	0.98	1	*	63	759	-	697	0.01
	gnl|UG|Ta#S32535299	62998	0.98	1	*	63	759	-	697	0.01
	gnl|UG|Ta#S32535299	74227	1	304	*	372	501	-	569	0.001
	gnl|UG|Ta#S32535299	74227	0.97	372	*	443	912	-	983	0.07
	gnl|UG|Ta#S32535299	182970	0.98	704	*	756	51	-	103	0.05
3	gnl|UG|Ta#S32535764	136390	0.99	1	-	200	200	-	1	1e-10
	gnl|UG|Ta#S32535764	135196	0.99	201	-	696	496	-	1	00:00:00
	gnl|UG|Ta#S32535764	135268	0.98	697	-	784	154	-	66	0.002
2	gnl|UG|Ta#S32539391	291661	0.97	565	-	670	1	-	106	0.0001
	gnl|UG|Ta#S32539391	357491	1	671	-	741	1	-	71	0.001
2	gnl|UG|Ta#S32542221	26055	1	59	-	181	644	-	766	1e-06
	gnl|UG|Ta#S32542221	26055	1	178	-	269	854	-	945	0.0002
	gnl|UG|Ta#S32542221	1983	0.97	268	*	386	318	-	436	2e-05
	gnl|UG|Ta#S32542221	1983	1	373	*	468	518	-	613	0.0001
3	gnl|UG|Ta#S32542359	147719	1	1	-	88	180	-	267	0.0003
	gnl|UG|Ta#S32542359	147720	1	89	*	188	1	-	100	0.0007
	gnl|UG|Ta#S32542359	26508	0.98	535	*	587	646	-	594	0.01
2	gnl|UG|Ta#S32545158	15933	0.98	218	-	697	480	-	1	00:00:00
	gnl|UG|Ta#S32545158	151254	1	698	-	754	130	-	74	0.07
2	gnl|UG|Ta#S32548177	131575	1	35	*	96	62	-	1	0.09
	gnl|UG|Ta#S32548177	9940	0.97	402	*	527	248	-	123	2e-05
	gnl|UG|Ta#S32548177	9940	0.97	402	*	527	248	-	123	2e-05
2	gnl|UG|Ta#S32550209	30685	0.98	1	*	54	586	-	639	0.02
	gnl|UG|Ta#S32550209	136608	0.98	255	*	304	147	-	98	0.3
2	gnl|UG|Ta#S32553201	63642	1	352	-	446	417	-	511	0.0006
	gnl|UG|Ta#S32553201	195378	0.99	447	-	648	338	-	136	1e-10
	gnl|UG|Ta#S32553201	195378	0.98	645	-	706	63	-	1	0.06
2	gnl|UG|Ta#S32554238	31428	0.97	1	*	229	37	-	266	2e-10
	gnl|UG|Ta#S32554238	36664	0.98	678	*	845	167	-	1	1e-08
3	gnl|UG|Ta#S32554627	151461	1	1	-	125	791	-	915	1e-06
	gnl|UG|Ta#S32554627	151463	0.99	126	-	695	1	-	569	00:00:00
	gnl|UG|Ta#S32554627	62516	0.97	696	-	897	1	-	198	2e-09
2	gnl|UG|Ta#S32559519	56028	1	534	*	799	266	-	1	5e-14
	gnl|UG|Ta#S32559519	215622	0.98	834	*	898	197	-	134	0.05
2	gnl|UG|Ta#S32560078	182342	1	224	*	288	69	-	133	0.02
	gnl|UG|Ta#S32560078	128879	0.97	493	*	578	87	-	2	0.001
2	gnl|UG|Ta#S32561878	220598	0.97	1	*	90	176	-	265	0.007
	gnl|UG|Ta#S32561878	48349	0.98	650	*	803	154	-	1	9e-07
2	gnl|UG|Ta#S32564141	155986	0.99	343	*	654	7	-	318	3e-16
	gnl|UG|Ta#S32564141	155984	1	705	*	780	76	-	1	0.002
2	gnl|UG|Ta#S32564464	164225	0.97	188	-	287	11	-	110	0.0008
	gnl|UG|Ta#S32564464	164224	0.99	287	-	627	341	-	1	9e-17
2	gnl|UG|Ta#S32565664	103301	0.99	44	*	291	228	-	475	9e-12
	gnl|UG|Ta#S32565664	298234	0.98	461	*	650	195	-	6	7e-09
2	gnl|UG|Ta#S32566694	167508	0.97	1	*	281	281	-	1	2e-13
	gnl|UG|Ta#S32566694	167505	1	765	*	848	4	-	87	0.008
2	gnl|UG|Ta#S32569318	43670	0.99	53	-	253	817	-	616	3e-10
	gnl|UG|Ta#S32569318	43670	1	251	-	378	493	-	366	3e-06
	gnl|UG|Ta#S32569318	43670	1	374	*	470	130	-	34	0.0004
	gnl|UG|Ta#S32569318	20649	0.97	546	*	640	1	-	93	0.0004
	gnl|UG|Ta#S32569318	20649	1	640	-	731	325	-	416	0.0003
2	gnl|UG|Ta#S32570084	72410	0.99	367	*	497	131	-	1	3e-06
	gnl|UG|Ta#S32570084	67609	0.98	657	*	854	163	-	360	3e-09
2	gnl|UG|Ta#S32570215	61180	0.97	1	*	402	460	-	862	00:00:00
	gnl|UG|Ta#S32570215	66436	0.97	608	*	789	204	-	385	1e-08
3	gnl|UG|Ta#S32570452	148155	0.97	141	-	422	279	-	1	2e-13
	gnl|UG|Ta#S32570452	165758	0.98	423	-	603	179	-	1	7e-08
	gnl|UG|Ta#S32570452	31055	0.99	604	-	730	534	-	408	4e-06
3	gnl|UG|Ta#S32572064	160486	1	1	-	492	403	-	894	00:00:00
	gnl|UG|Ta#S32572064	160486	1	491	-	650	1010	-	1169	4e-08
	gnl|UG|Ta#S32572064	15429	1	647	*	702	1180	-	1235	0.03
	gnl|UG|Ta#S32572064	152549	0.98	753	*	828	84	-	10	0.004
3	gnl|UG|Ta#S32573612	38096	1	1	-	141	54	-	194	1e-07
	gnl|UG|Ta#S32573612	139552	0.97	138	*	262	128	-	4	1e-05
	gnl|UG|Ta#S32573612	58502	1	299	*	409	457	-	347	7e-05
2	gnl|UG|Ta#S32573670	175102	1	1	-	158	700	-	543	5e-08
	gnl|UG|Ta#S32573670	175102	0.98	155	*	243	89	-	1	0.0006
	gnl|UG|Ta#S32573670	30171	1	375	*	439	639	-	575	0.03
	gnl|UG|Ta#S32573670	30171	1	437	-	672	448	-	213	2e-12
	gnl|UG|Ta#S32573670	30171	1	672	-	765	94	-	1	0.0002
2	gnl|UG|Ta#S32583270	25481	0.98	385	*	437	63	-	12	0.2
	gnl|UG|Ta#S32583270	355254	1	577	*	642	180	-	115	0.07
2	gnl|UG|Ta#S32583781	47362	0.99	137	*	457	362	-	682	3e-16
	gnl|UG|Ta#S32583781	54280	0.99	641	*	814	174	-	1	9e-08
2	gnl|UG|Ta#S32584388	169285	0.98	477	*	577	474	-	374	0.0006
	gnl|UG|Ta#S32584388	177812	0.97	643	*	741	258	-	160	0.0008
	gnl|UG|Ta#S32584388	177812	0.98	742	-	810	70	-	2	0.08
2	gnl|UG|Ta#S32584415	57199	1	671	-	772	1445	-	1546	0.0008
	gnl|UG|Ta#S32584415	144204	0.97	773	-	869	1	-	96	0.0004
2	gnl|UG|Ta#S32586048	92325	0.97	529	-	618	406	-	495	0.007
	gnl|UG|Ta#S32586048	51124	0.98	618	-	773	437	-	593	7e-07
2	gnl|UG|Ta#S32587945	33352	1	401	-	522	10	-	131	6e-06
	gnl|UG|Ta#S32587945	33352	1	521	-	593	217	-	289	0.001
	gnl|UG|Ta#S32587945	33352	0.99	587	*	691	440	-	545	0.0008
	gnl|UG|Ta#S32587945	32925	1	775	*	914	133	-	272	6e-07
2	gnl|UG|Ta#S32589214	63643	0.97	1	*	364	87	-	451	00:00:00
	gnl|UG|Ta#S32589214	157711	0.99	572	*	684	1	-	113	3e-05
2	gnl|UG|Ta#S32589654	171934	1	1	-	415	407	-	821	00:00:00
	gnl|UG|Ta#S32589654	171933	0.98	416	-	493	1	-	78	0.008
2	gnl|UG|Ta#S32589694	47922	0.99	2	*	464	465	-	1	00:00:00
	gnl|UG|Ta#S32589694	33660	0.99	577	*	733	157	-	1	1e-07
2	gnl|UG|Ta#S32590156	140599	0.99	1	-	236	235	-	1	1e-11
	gnl|UG|Ta#S32590156	82082	0.99	237	-	646	1142	-	735	00:00:00
2	gnl|UG|Ta#S32591166	33826	0.97	1	-	366	7	-	375	8e-17
	gnl|UG|Ta#S32591166	33826	0.98	360	-	455	451	-	546	0.0007
	gnl|UG|Ta#S32591166	186450	1	452	-	517	97	-	162	0.08
	gnl|UG|Ta#S32591166	186450	0.99	515	-	625	276	-	386	3e-05
2	gnl|UG|Ta#S32591172	45743	0.98	1	-	189	122	-	311	3e-09
	gnl|UG|Ta#S32591172	45743	1	187	*	305	393	-	511	3e-05
	gnl|UG|Ta#S32591172	178380	0.99	365	*	467	687	-	585	0.0009
	gnl|UG|Ta#S32591172	178380	1	467	-	783	454	-	138	2e-16
2	gnl|UG|Ta#S32591313	171453	0.98	3	*	99	146	-	49	0.0002
	gnl|UG|Ta#S32591313	36967	0.99	691	*	850	1	-	161	2e-07
2	gnl|UG|Ta#S32593988	145482	0.97	228	-	337	693	-	585	0.0009
	gnl|UG|Ta#S32593988	145482	0.97	334	-	475	330	-	471	2e-06
	gnl|UG|Ta#S32593988	11135	1	473	-	543	547	-	477	0.001
	gnl|UG|Ta#S32593988	11135	0.98	537	-	823	379	-	94	4e-14
2	gnl|UG|Ta#S32595404	179692	0.99	1	*	153	552	-	399	2e-07
	gnl|UG|Ta#S32595404	54073	0.99	234	*	380	1	-	147	3e-07
	gnl|UG|Ta#S32595404	54073	1	378	-	658	310	-	590	2e-14
	gnl|UG|Ta#S32595404	54073	0.98	658	-	839	674	-	855	5e-09
2	gnl|UG|Ta#S32595976	224471	0.99	1	-	277	63	-	338	6e-14
	gnl|UG|Ta#S32595976	135815	0.99	278	-	485	1	-	208	2e-10
3	gnl|UG|Ta#S32601409	59236	1	464	-	598	154	-	20	3e-06
	gnl|UG|Ta#S32601409	53527	1	598	-	656	753	-	695	0.06
	gnl|UG|Ta#S32601409	53527	1	655	-	743	596	-	508	0.0001
	gnl|UG|Ta#S32601409	342870	0.99	741	-	851	50	-	160	1e-05
2	gnl|UG|Ta#S32602626	135418	0.97	180	*	316	1	-	137	1e-06
	gnl|UG|Ta#S32602626	16901	0.98	361	*	789	1	-	429	00:00:00
2	gnl|UG|Ta#S32605898	165631	0.99	51	*	191	1	-	142	7e-06
	gnl|UG|Ta#S32605898	33643	0.98	208	*	693	1	-	486	00:00:00
	gnl|UG|Ta#S32605898	33643	0.97	693	-	798	573	-	677	0.0002
2	gnl|UG|Ta#S32606274	271311	0.99	1	-	367	368	-	1	00:00:00
	gnl|UG|Ta#S32606274	159307	0.98	368	-	553	187	-	1	3e-09
2	gnl|UG|Ta#S32607216	65928	1	1	-	379	379	-	1	00:00:00
	gnl|UG|Ta#S32607216	189895	1	380	*	761	598	-	217	00:00:00
	gnl|UG|Ta#S32607216	189895	1	380	*	761	598	-	217	00:00:00
2	gnl|UG|Ta#S32608900	169921	0.98	1	*	381	381	-	1	00:00:00
	gnl|UG|Ta#S32608900	46650	0.98	434	*	642	209	-	1	2e-10
3	gnl|UG|Ta#S32612907	67442	0.98	2	*	220	922	-	1137	4e-10
	gnl|UG|Ta#S32612907	180850	1	320	*	462	1463	-	1605	1e-07
	gnl|UG|Ta#S32612907	180850	1	460	-	540	1682	-	1762	0.003
	gnl|UG|Ta#S32612907	111928	0.99	536	*	723	1768	-	1581	5e-09
	gnl|UG|Ta#S32612907	111928	0.98	745	*	795	986	-	937	0.3
3	gnl|UG|Ta#S32616323	143824	0.98	253	-	315	192	-	254	0.02
	gnl|UG|Ta#S32616323	284767	0.97	312	*	416	63	-	165	0.0005
	gnl|UG|Ta#S32616323	161484	0.97	529	*	763	11	-	245	2e-11
2	gnl|UG|Ta#S32617424	61911	0.98	646	-	774	432	-	304	2e-06
	gnl|UG|Ta#S32617424	123916	1	773	-	825	732	-	680	0.01
2	gnl|UG|Ta#S32618024	123308	1	3	-	263	261	-	1	2e-13
	gnl|UG|Ta#S32618024	229497	0.98	264	-	560	1	-	296	2e-15
3	gnl|UG|Ta#S32620140	307923	0.99	14	*	287	1	-	275	3e-14
	gnl|UG|Ta#S32620140	76646	0.97	341	*	440	364	-	464	0.0008
	gnl|UG|Ta#S32620140	165212	1	484	*	712	297	-	69	2e-11
2	gnl|UG|Ta#S32622040	17445	1	491	-	573	125	-	43	0.002
	gnl|UG|Ta#S32622040	12428	0.99	570	-	746	842	-	1018	2e-08
2	gnl|UG|Ta#S32623097	68880	0.99	1	*	290	1051	-	1341	5e-15
	gnl|UG|Ta#S32623097	68880	0.98	330	*	510	1559	-	1739	2e-08
	gnl|UG|Ta#S32623097	58187	0.97	516	-	666	2205	-	2054	2e-06
	gnl|UG|Ta#S32623097	58187	0.97	663	-	831	1480	-	1312	3e-07
2	gnl|UG|Ta#S32624621	68170	0.97	38	-	209	1	-	172	2e-07
	gnl|UG|Ta#S32624621	68170	0.97	204	-	299	319	-	414	0.0003
	gnl|UG|Ta#S32624621	227673	0.99	300	-	581	319	-	38	1e-14
2	gnl|UG|Ta#S32624924	338567	1	1	*	182	33	-	214	2e-09
	gnl|UG|Ta#S32624924	204985	0.98	217	*	317	1	-	102	0.0005
	gnl|UG|Ta#S32624924	204985	0.98	314	-	397	184	-	267	0.003
2	gnl|UG|Ta#S32627417	52310	1	320	*	513	341	-	534	6e-10
	gnl|UG|Ta#S32627417	36836	0.98	537	*	859	323	-	1	3e-16
3	gnl|UG|Ta#S32628100	159751	1	23	-	73	51	-	1	0.02
	gnl|UG|Ta#S32628100	159748	1	74	*	385	312	-	1	1e-16
	gnl|UG|Ta#S32628100	159749	1	450	*	576	3	-	129	9e-06
3	gnl|UG|Ta#S32628954	353228	0.99	1	-	200	51	-	250	6e-10
	gnl|UG|Ta#S32628954	230059	0.97	201	-	309	1	-	107	0.0002
	gnl|UG|Ta#S32628954	41212	0.98	310	-	477	1	-	167	2e-08
2	gnl|UG|Ta#S32630198	4145	0.98	1	-	97	310	-	406	0.0009
	gnl|UG|Ta#S32630198	45727	0.97	90	-	157	76	-	144	0.06
3	gnl|UG|Ta#S32631291	65409	1	2	-	120	113	-	231	3e-05
	gnl|UG|Ta#S32631291	65409	1	120	-	194	341	-	415	0.007
	gnl|UG|Ta#S32631291	69599	0.98	193	*	381	358	-	546	7e-09
	gnl|UG|Ta#S32631291	312352	0.97	478	*	571	122	-	29	0.0004
2	gnl|UG|Ta#S32639209	170004	0.98	1	-	163	161	-	1	7e-07
	gnl|UG|Ta#S32639209	59756	0.99	164	-	642	479	-	1	00:00:00
2	gnl|UG|Ta#S32641178	35796	0.98	217	-	426	79	-	288	3e-10
	gnl|UG|Ta#S32641178	35796	0.98	426	*	524	378	-	476	0.0002
	gnl|UG|Ta#S32641178	15150	0.97	688	*	835	19	-	165	7e-06
2	gnl|UG|Ta#S32643749	31320	0.97	1	*	437	438	-	5	00:00:00
	gnl|UG|Ta#S32643749	35636	0.97	558	*	755	708	-	905	2e-09
3	gnl|UG|Ta#S32643877	72595	0.98	278	*	361	118	-	35	0.004
	gnl|UG|Ta#S32643877	177766	0.97	453	*	588	137	-	2	9e-06
	gnl|UG|Ta#S32643877	177767	0.97	648	*	724	304	-	227	0.001
	gnl|UG|Ta#S32643877	177767	0.98	722	-	835	137	-	25	1e-05
2	gnl|UG|Ta#S32645349	152006	0.99	38	*	221	185	-	1	1e-09
	gnl|UG|Ta#S32645349	73373	1	283	*	384	1370	-	1269	0.0008
	gnl|UG|Ta#S32645349	73373	1	382	-	516	1033	-	899	4e-06
	gnl|UG|Ta#S32645349	73373	1	513	-	870	794	-	437	00:00:00
3	gnl|UG|Ta#S32653668	154563	1	42	-	236	1	-	195	1e-10
	gnl|UG|Ta#S32653668	14539	1	239	-	344	1579	-	1474	4e-05
	gnl|UG|Ta#S32653668	14539	1	342	-	436	516	-	422	0.0005
	gnl|UG|Ta#S32653668	14539	1	434	-	530	343	-	247	0.0004
	gnl|UG|Ta#S32653668	14539	1	529	-	580	154	-	103	0.04
	gnl|UG|Ta#S32653668	154562	1	579	-	713	504	-	638	3e-06
2	gnl|UG|Ta#S32654354	34555	1	314	-	470	295	-	139	2e-07
	gnl|UG|Ta#S32654354	34555	1	477	*	527	96	-	146	0.02
	gnl|UG|Ta#S32654354	54126	0.99	687	*	847	844	-	685	2e-07
2	gnl|UG|Ta#S32654425	49055	0.98	1	*	147	264	-	118	2e-07
	gnl|UG|Ta#S32654425	200421	0.98	454	*	548	271	-	365	0.0003
5	gnl|UG|Ta#S32658563	193074	0.99	2	*	176	299	-	126	3e-08
	gnl|UG|Ta#S32658563	157469	1	396	*	488	142	-	234	0.0007
	gnl|UG|Ta#S32658563	10319	1	487	-	565	363	-	285	0.004
	gnl|UG|Ta#S32658563	31715	1	566	-	648	425	-	343	0.003
	gnl|UG|Ta#S32658563	31715	0.98	645	-	714	182	-	113	0.006
	gnl|UG|Ta#S32658563	154200	0.98	713	-	774	403	-	343	0.02
3	gnl|UG|Ta#S32658990	37803	1	94	-	167	1	-	74	0.003
	gnl|UG|Ta#S32658990	169840	1	164	*	533	370	-	1	00:00:00
	gnl|UG|Ta#S32658990	62929	0.97	747	*	839	1	-	91	0.0006
3	gnl|UG|Ta#S32659341	52414	1	13	-	142	237	-	366	2e-06
	gnl|UG|Ta#S32659341	109654	0.99	143	*	459	1	-	318	1e-16
	gnl|UG|Ta#S32659341	93699	1	478	*	709	247	-	16	4e-12
	gnl|UG|Ta#S32659341	93699	1	478	*	709	247	-	16	4e-12
2	gnl|UG|Ta#S32665125	128206	1	28	-	221	194	-	1	4e-10
	gnl|UG|Ta#S32665125	125399	0.98	222	-	388	731	-	565	8e-08
2	gnl|UG|Ta#S32667409	284359	1	1	-	654	13	-	666	00:00:00
	gnl|UG|Ta#S32667409	134408	0.97	652	-	771	10	-	129	1e-05
2	gnl|UG|Ta#S32668785	230879	0.99	406	-	666	299	-	39	6e-13
	gnl|UG|Ta#S32668785	31790	0.97	663	-	816	590	-	743	4e-07
2	gnl|UG|Ta#S32670575	131759	1	1	*	306	877	-	1182	3e-16
	gnl|UG|Ta#S32670575	74544	0.99	441	*	799	490	-	132	00:00:00
3	gnl|UG|Ta#S32671044	135477	1	273	-	352	282	-	203	0.001
	gnl|UG|Ta#S32671044	195631	0.97	351	-	539	46	-	234	1e-09
	gnl|UG|Ta#S32671044	22279	1	540	-	636	1	-	97	0.0003
2	gnl|UG|Ta#S32671231	138084	1	75	-	297	562	-	784	3e-11
	gnl|UG|Ta#S32671231	282783	0.98	295	-	656	632	-	271	00:00:00
3	gnl|UG|Ta#S32673126	45312	0.97	1	*	168	86	-	254	3e-07
	gnl|UG|Ta#S32673126	37512	0.98	415	*	477	625	-	687	0.02
	gnl|UG|Ta#S32673126	104073	0.98	627	*	690	354	-	291	0.01
2	gnl|UG|Ta#S32673435	137279	1	1	-	263	263	-	1	1e-13
	gnl|UG|Ta#S32673435	281141	0.98	264	-	416	1	-	153	2e-07
3	gnl|UG|Ta#S32678465	24237	0.97	2	-	158	603	-	447	9e-07
	gnl|UG|Ta#S32678465	158829	1	156	*	212	624	-	568	0.07
	gnl|UG|Ta#S32678465	16621	1	241	*	310	402	-	333	0.004
2	gnl|UG|Ta#S32680383	66362	0.99	1	*	476	510	-	986	00:00:00
	gnl|UG|Ta#S32680383	13634	0.98	686	*	894	282	-	76	1e-10
3	gnl|UG|Ta#S32681487	139173	0.97	444	-	536	289	-	197	0.0002
	gnl|UG|Ta#S32681487	75054	0.99	534	-	681	148	-	1	1e-07
	gnl|UG|Ta#S32681487	15064	0.99	682	-	859	271	-	94	2e-08
2	gnl|UG|Ta#S32681669	43511	1	106	*	191	86	-	1	0.0006
	gnl|UG|Ta#S32681669	60958	1	484	*	822	202	-	540	1e-18
3	gnl|UG|Ta#S32682954	174281	0.99	1	-	416	441	-	30	00:00:00
	gnl|UG|Ta#S32682954	174279	1	414	*	532	419	-	301	3e-05
	gnl|UG|Ta#S32682954	174280	1	580	*	643	1	-	64	0.01
	gnl|UG|Ta#S32682954	174280	1	643	-	743	144	-	244	0.0003
2	gnl|UG|Ta#S32684403	49907	1	314	-	496	407	-	225	7e-09
	gnl|UG|Ta#S32684403	49907	1	496	-	637	142	-	1	5e-07
	gnl|UG|Ta#S32684403	193754	1	638	-	782	1	-	145	1e-07
3	gnl|UG|Ta#S32684835	52107	0.98	1	*	217	324	-	108	4e-10
	gnl|UG|Ta#S32684835	154718	0.98	337	*	408	478	-	407	0.002
	gnl|UG|Ta#S32684835	30719	0.98	506	*	645	781	-	642	1e-06
	gnl|UG|Ta#S32684835	30719	0.97	637	-	826	256	-	66	5e-09
4	gnl|UG|Ta#S32688239	261680	0.98	297	-	416	120	-	1	2e-05
	gnl|UG|Ta#S32688239	340596	0.97	415	*	540	157	-	33	1e-05
	gnl|UG|Ta#S32688239	355857	0.97	456	*	578	123	-	1	2e-05
	gnl|UG|Ta#S32688239	343816	0.97	579	-	742	1	-	164	3e-07
2	gnl|UG|Ta#S32690486	142527	1	1	-	113	291	-	179	5e-05
	gnl|UG|Ta#S32690486	142527	1	111	*	193	101	-	19	0.002
	gnl|UG|Ta#S32690486	62249	0.99	576	*	689	307	-	193	6e-05
2	gnl|UG|Ta#S32691969	183899	0.98	1	*	471	226	-	695	00:00:00
	gnl|UG|Ta#S32691969	33521	0.97	625	*	773	1	-	149	7e-06
5	gnl|UG|Ta#S32693354	160071	0.97	1	-	93	93	-	1	0.0002
	gnl|UG|Ta#S32693354	160067	0.99	97	-	307	4	-	214	1e-10
	gnl|UG|Ta#S32693354	160064	0.99	306	-	411	175	-	280	0.0002
	gnl|UG|Ta#S32693354	160068	0.97	408	-	584	101	-	277	4e-08
	gnl|UG|Ta#S32693354	160070	0.97	585	-	917	1	-	332	3e-16
3	gnl|UG|Ta#S32693529	72977	1	187	-	354	831	-	664	1e-08
	gnl|UG|Ta#S32693529	50972	1	354	*	486	206	-	74	4e-06
	gnl|UG|Ta#S32693529	202466	1	536	*	608	450	-	378	0.009
	gnl|UG|Ta#S32693529	202466	1	607	-	696	295	-	206	0.0003
	gnl|UG|Ta#S32693529	202466	1	693	-	750	58	-	1	0.02
2	gnl|UG|Ta#S32694313	48306	1	1	*	72	72	-	1	0.004
	gnl|UG|Ta#S32694313	64549	0.97	316	*	833	544	-	30	00:00:00
2	gnl|UG|Ta#S32694497	18807	0.97	383	-	477	351	-	257	0.0001
	gnl|UG|Ta#S32694497	18807	0.98	475	-	575	173	-	73	0.0006
	gnl|UG|Ta#S32694497	46759	0.99	575	-	676	37	-	138	0.0003
	gnl|UG|Ta#S32694497	46759	1	673	-	831	241	-	399	2e-08
2	gnl|UG|Ta#S32699764	146595	0.97	145	*	322	178	-	1	2e-08
	gnl|UG|Ta#S32699764	24268	0.97	353	*	613	1	-	261	2e-12
	gnl|UG|Ta#S32699764	24268	0.99	609	-	712	358	-	461	0.0003
2	gnl|UG|Ta#S32701038	318111	0.99	295	-	648	368	-	15	00:00:00
	gnl|UG|Ta#S32701038	41068	0.99	647	-	818	541	-	370	4e-08
2	gnl|UG|Ta#S32702542	170319	1	1	*	215	316	-	102	1e-11
	gnl|UG|Ta#S32702542	189895	0.99	514	*	856	1	-	343	2e-17
	gnl|UG|Ta#S32702542	189895	0.99	514	*	856	1	-	343	2e-17
2	gnl|UG|Ta#S32702810	168421	0.97	285	*	524	1845	-	2085	3e-11
	gnl|UG|Ta#S32702810	168420	0.98	540	*	683	247	-	390	6e-06
3	gnl|UG|Ta#S32707203	207134	1	3	-	94	37	-	128	0.0002
	gnl|UG|Ta#S32707203	207135	0.97	95	*	335	2	-	241	3e-11
	gnl|UG|Ta#S32707203	3220	1	577	*	631	625	-	571	0.09
	gnl|UG|Ta#S32707203	3220	1	628	-	711	347	-	264	0.007
	gnl|UG|Ta#S32707203	3220	0.98	705	-	758	192	-	139	0.02
2	gnl|UG|Ta#S32708334	49059	0.99	1	*	221	222	-	1	3e-11
	gnl|UG|Ta#S32708334	31888	1	313	*	590	1	-	278	1e-14
	gnl|UG|Ta#S32708334	31888	1	588	-	691	634	-	737	6e-05
	gnl|UG|Ta#S32708334	31888	0.98	690	-	874	827	-	1011	1e-09
2	gnl|UG|Ta#S32708359	127803	0.98	1	*	75	316	-	242	0.004
	gnl|UG|Ta#S32708359	203602	0.98	286	*	336	158	-	108	0.8
2	gnl|UG|Ta#S32708809	7262	1	308	-	384	402	-	478	0.006
	gnl|UG|Ta#S32708809	7262	1	383	*	460	1038	-	1115	0.002
	gnl|UG|Ta#S32708809	216559	1	519	*	579	62	-	122	0.04
	gnl|UG|Ta#S32708809	216559	0.99	579	-	686	190	-	297	2e-05
2	gnl|UG|Ta#S32709473	146984	0.99	1	-	458	793	-	335	00:00:00
	gnl|UG|Ta#S32709473	146983	0.99	452	-	787	1677	-	1342	1e-17
2	gnl|UG|Ta#S32716713	34151	0.98	1	-	260	262	-	1	1e-13
	gnl|UG|Ta#S32716713	192799	0.99	261	-	481	221	-	1	2e-11
2	gnl|UG|Ta#S32718222	183628	0.98	286	*	368	206	-	124	0.001
	gnl|UG|Ta#S32718222	44610	0.99	460	*	597	232	-	95	3e-06
3	gnl|UG|Ta#S32718965	347074	0.97	45	*	146	101	-	1	0.0003
	gnl|UG|Ta#S32718965	27767	0.98	277	*	350	20	-	93	0.001
	gnl|UG|Ta#S32718965	72345	0.98	349	-	498	355	-	504	2e-07
2	gnl|UG|Ta#S32721898	194868	1	703	-	754	331	-	382	0.05
	gnl|UG|Ta#S32721898	194869	0.98	756	-	806	298	-	248	0.8
2	gnl|UG|Ta#S32725120	144327	1	1	*	62	1030	-	1091	0.01
	gnl|UG|Ta#S32725120	57211	0.97	262	*	388	24	-	148	3e-05
2	gnl|UG|Ta#S32725276	189837	0.99	375	-	501	494	-	368	5e-06
	gnl|UG|Ta#S32725276	189837	0.99	499	*	741	292	-	50	2e-12
	gnl|UG|Ta#S32725276	362217	0.98	853	*	908	152	-	98	0.05
3	gnl|UG|Ta#S32726973	138398	1	407	-	480	160	-	233	0.003
	gnl|UG|Ta#S32726973	51877	0.97	475	-	568	185	-	278	0.0004
	gnl|UG|Ta#S32726973	51877	1	566	-	628	360	-	422	0.03
	gnl|UG|Ta#S32726973	32678	1	628	-	687	1276	-	1217	0.02
	gnl|UG|Ta#S32726973	32678	0.97	684	-	772	1117	-	1028	0.007
3	gnl|UG|Ta#S32728109	154752	1	292	-	346	2	-	56	0.01
	gnl|UG|Ta#S32728109	154752	0.98	340	-	432	197	-	289	0.0004
	gnl|UG|Ta#S32728109	154752	1	428	*	480	372	-	424	0.01
	gnl|UG|Ta#S32728109	154750	1	522	*	595	611	-	538	0.003
	gnl|UG|Ta#S32728109	154750	0.99	592	-	691	451	-	352	0.0005
	gnl|UG|Ta#S32728109	37024	1	690	-	778	358	-	270	0.0001
2	gnl|UG|Ta#S32729160	164956	1	482	-	558	19	-	95	0.006
	gnl|UG|Ta#S32729160	16721	0.98	557	-	712	752	-	597	4e-07
	gnl|UG|Ta#S32729160	16721	0.97	711	-	783	500	-	428	0.02
2	gnl|UG|Ta#S32730226	170997	0.99	1	*	355	216	-	572	00:00:00
	gnl|UG|Ta#S32730226	54701	0.98	499	*	774	1	-	274	1e-14
3	gnl|UG|Ta#S32733595	146256	0.99	299	*	412	114	-	1	8e-05
	gnl|UG|Ta#S32733595	146245	0.99	430	*	655	228	-	3	2e-11
	gnl|UG|Ta#S32733595	217952	1	786	*	835	1	-	50	0.06
2	gnl|UG|Ta#S32733670	287472	1	1	*	137	137	-	1	2e-06
	gnl|UG|Ta#S32733670	159143	0.99	204	*	598	1	-	392	00:00:00
2	gnl|UG|Ta#S32734265	24942	0.97	1	*	377	308	-	682	00:00:00
	gnl|UG|Ta#S32734265	43329	0.98	612	*	665	202	-	255	0.02
	gnl|UG|Ta#S32734265	43329	0.99	663	-	777	845	-	959	2e-05
	gnl|UG|Ta#S32734265	43329	0.98	774	-	855	1068	-	1150	0.005
4	gnl|UG|Ta#S32734299	181102	0.97	1	-	122	476	-	594	8e-05
	gnl|UG|Ta#S32734299	181103	0.99	115	*	329	215	-	1	3e-10
	gnl|UG|Ta#S32734299	32802	1	458	*	623	373	-	208	2e-08
	gnl|UG|Ta#S32734299	220641	1	623	-	722	262	-	163	0.0001
	gnl|UG|Ta#S32734299	220641	1	719	-	783	65	-	1	0.03
2	gnl|UG|Ta#S32734492	148993	0.97	1	-	214	575	-	787	3e-10
	gnl|UG|Ta#S32734492	46488	0.97	215	-	648	1	-	434	00:00:00
3	gnl|UG|Ta#S32734989	209069	0.97	1	*	264	131	-	395	3e-12
	gnl|UG|Ta#S32734989	165544	0.99	314	*	416	225	-	123	0.0001
	gnl|UG|Ta#S32734989	165542	0.99	515	*	809	295	-	1	8e-15
3	gnl|UG|Ta#S32738156	35787	1	10	*	363	481	-	128	00:00:00
	gnl|UG|Ta#S32738156	26740	1	473	*	615	1	-	143	1e-07
	gnl|UG|Ta#S32738156	26740	1	615	-	665	253	-	303	0.02
	gnl|UG|Ta#S32738156	73711	0.98	672	-	840	1	-	169	9e-08
2	gnl|UG|Ta#S32738844	196751	0.99	1	*	275	159	-	434	2e-14
	gnl|UG|Ta#S32738844	55335	1	508	*	660	555	-	403	3e-07
	gnl|UG|Ta#S32738844	55335	1	658	-	753	325	-	230	0.0001
2	gnl|UG|Ta#S32739571	300341	0.97	50	-	214	1	-	165	3e-07
	gnl|UG|Ta#S32739571	124283	0.98	215	*	300	2096	-	2011	0.002
	gnl|UG|Ta#S32739571	124283	0.99	324	*	558	1293	-	1059	4e-12
	gnl|UG|Ta#S32739571	124283	0.98	558	-	752	262	-	68	1e-09
2	gnl|UG|Ta#S33259760	23305	0.98	334	*	386	918	-	970	0.09
	gnl|UG|Ta#S33259760	90812	1	411	*	479	1418	-	1486	0.002
	gnl|UG|Ta#S33259760	90812	0.99	479	-	578	1575	-	1674	0.0007
2	gnl|UG|Ta#S33939850	32375	0.99	39	*	197	256	-	98	2e-07
	gnl|UG|Ta#S33939850	48571	0.98	1264	*	1926	1	-	663	00:00:00
3	gnl|UG|Ta#S34123896	216466	0.99	149	*	321	240	-	68	2e-08
	gnl|UG|Ta#S34123896	52064	1	485	*	738	1	-	254	4e-13
	gnl|UG|Ta#S34123896	52064	1	738	-	853	343	-	458	2e-05
	gnl|UG|Ta#S34123896	188934	0.98	854	-	937	1	-	84	0.005
5	gnl|UG|Ta#S35351511	153630	1	217	-	518	124	-	425	1e-15
	gnl|UG|Ta#S35351511	184233	0.99	514	-	680	1074	-	907	5e-08
	gnl|UG|Ta#S35351511	184233	1	674	-	817	338	-	195	7e-07
	gnl|UG|Ta#S35351511	184233	1	814	-	875	120	-	59	0.03
	gnl|UG|Ta#S35351511	184234	1	872	*	993	122	-	1	1e-05
	gnl|UG|Ta#S35351511	45700	1	1011	*	1117	301	-	407	3e-05
	gnl|UG|Ta#S35351511	45700	1	1116	*	1336	515	-	735	1e-11
	gnl|UG|Ta#S35351511	37651	1	1702	*	1753	1	-	52	0.01
2	gnl|UG|Ta#S37608488	147280	0.97	200	*	290	202	-	292	0.004
	gnl|UG|Ta#S37608488	35306	0.98	460	*	810	1	-	352	3e-17
2	gnl|UG|Ta#S37747284	171638	0.98	305	-	447	516	-	660	6e-06
	gnl|UG|Ta#S37747284	65278	0.98	443	-	578	102	-	237	2e-06
2	gnl|UG|Ta#S37755817	49375	0.99	265	-	531	1	-	266	2e-13
	gnl|UG|Ta#S37755817	188222	1	530	-	734	26	-	230	4e-10
2	gnl|UG|Ta#S37758093	70159	0.99	89	-	206	317	-	434	4e-05
	gnl|UG|Ta#S37758093	17402	1	202	-	656	96	-	550	00:00:00
2	gnl|UG|Ta#S37760001	180480	0.97	147	*	278	456	-	325	1e-06
	gnl|UG|Ta#S37760001	218623	0.98	331	*	435	694	-	591	0.0001
	gnl|UG|Ta#S37760001	218623	0.97	432	-	551	446	-	327	7e-05
	gnl|UG|Ta#S37760001	218623	0.97	546	-	773	228	-	1	6e-10
2	gnl|UG|Ta#S37760806	165676	0.98	385	*	506	486	-	365	1e-05
	gnl|UG|Ta#S37760806	63768	1	583	*	651	69	-	1	0.002
2	gnl|UG|Ta#S37762441	284860	0.98	1	-	60	61	-	1	0.06
	gnl|UG|Ta#S37762441	44737	0.97	61	-	133	1	-	73	0.02
3	gnl|UG|Ta#S37770670	11114	1	1	*	54	167	-	114	0.04
	gnl|UG|Ta#S37770670	62782	0.98	246	*	474	624	-	396	2e-11
	gnl|UG|Ta#S37770670	62782	1	471	-	620	276	-	127	2e-07
	gnl|UG|Ta#S37770670	34510	1	617	-	831	1025	-	811	1e-11
	gnl|UG|Ta#S37770670	34510	0.98	830	-	914	736	-	653	0.004
2	gnl|UG|Ta#S37770796	205281	1	2	-	85	84	-	1	0.008
	gnl|UG|Ta#S37770796	196218	0.97	86	-	171	122	-	37	0.001
2	gnl|UG|Ta#S37771266	161738	1	524	-	764	332	-	572	5e-12
	gnl|UG|Ta#S37771266	161739	0.99	762	-	956	518	-	713	8e-09
2	gnl|UG|Ta#S37771696	75261	0.97	388	-	512	1202	-	1078	1e-05
	gnl|UG|Ta#S37771696	75261	0.98	508	-	561	465	-	412	0.02
	gnl|UG|Ta#S37771696	75261	1	558	*	720	331	-	169	1e-08
	gnl|UG|Ta#S37771696	172559	1	751	*	804	1	-	54	0.04
	gnl|UG|Ta#S37771696	172559	1	751	*	804	1	-	54	0.04
	gnl|UG|Ta#S37771696	172559	0.97	802	*	884	222	-	304	0.006
	gnl|UG|Ta#S37771696	172559	0.97	802	*	884	222	-	304	0.006
2	gnl|UG|Ta#S37771810	200516	0.99	405	*	554	91	-	240	8e-07
	gnl|UG|Ta#S37771810	189439	1	817	*	904	1	-	88	0.0005
	gnl|UG|Ta#S37771810	189439	1	903	-	970	177	-	244	0.007
2	gnl|UG|Ta#S37776722	63334	1	81	-	247	649	-	483	5e-08
	gnl|UG|Ta#S37776722	63334	1	245	-	341	406	-	310	0.0004
	gnl|UG|Ta#S37776722	63334	1	339	-	427	194	-	106	0.0001
	gnl|UG|Ta#S37776722	138982	1	424	-	509	1539	-	1454	0.0006
	gnl|UG|Ta#S37776722	138982	0.98	507	*	591	1295	-	1211	0.003
	gnl|UG|Ta#S37776722	138982	0.97	575	*	721	410	-	263	3e-06
	gnl|UG|Ta#S37776722	138982	1	715	-	834	197	-	78	7e-05
3	gnl|UG|Ta#S37779049	155749	0.99	337	-	455	113	-	231	1e-05
	gnl|UG|Ta#S37779049	155747	0.97	455	*	527	139	-	67	0.02
	gnl|UG|Ta#S37779049	59825	0.97	743	*	857	1219	-	1106	2e-05
4	gnl|UG|Ta#S37779602	22580	0.98	1	*	184	1654	-	1835	2e-09
	gnl|UG|Ta#S37779602	165435	1	593	*	713	1	-	121	2e-05
	gnl|UG|Ta#S37779602	338201	1	724	*	815	99	-	190	0.0003
	gnl|UG|Ta#S37779602	25851	0.98	870	*	930	155	-	216	0.02
3	gnl|UG|Ta#S37780585	165111	0.99	1	-	374	93	-	465	00:00:00
	gnl|UG|Ta#S37780585	64520	1	375	-	495	622	-	502	2e-05
	gnl|UG|Ta#S37780585	28168	1	493	-	813	828	-	508	2e-17
2	gnl|UG|Ta#S37781093	343122	0.97	243	-	335	1	-	93	0.0002
	gnl|UG|Ta#S37781093	343122	0.97	337	*	439	209	-	311	0.0002
	gnl|UG|Ta#S37781093	176246	1	542	*	591	167	-	216	0.07
2	gnl|UG|Ta#S37781104	66213	1	694	-	764	71	-	1	0.001
	gnl|UG|Ta#S37781104	166207	0.98	773	-	888	198	-	313	2e-05
2	gnl|UG|Ta#S37786478	149698	0.98	19	-	385	2007	-	2372	00:00:00
	gnl|UG|Ta#S37786478	149700	0.98	386	-	686	151	-	450	4e-15
2	gnl|UG|Ta#S37788158	13381	0.98	1	*	55	809	-	863	0.05
	gnl|UG|Ta#S37788158	57274	0.98	492	*	793	1	-	302	1e-15
2	gnl|UG|Ta#S37807990	285815	1	1	-	110	110	-	1	1e-05
	gnl|UG|Ta#S37807990	230645	1	111	-	376	379	-	114	2e-14
3	gnl|UG|Ta#S37809714	71109	1	39	*	154	775	-	890	9e-05
	gnl|UG|Ta#S37809714	108414	1	204	*	421	218	-	1	2e-11
	gnl|UG|Ta#S37809714	99312	0.98	422	-	577	1	-	156	5e-07
2	gnl|UG|Ta#S37811262	160649	1	1	-	161	1238	-	1078	1e-08
	gnl|UG|Ta#S37811262	160649	0.97	161	*	258	896	-	799	0.0002
	gnl|UG|Ta#S37811262	160649	0.97	356	*	489	201	-	68	5e-06
	gnl|UG|Ta#S37811262	20526	0.98	531	*	699	370	-	202	8e-08
5	gnl|UG|Ta#S37816314	109309	0.98	1	-	91	91	-	1	0.0004
	gnl|UG|Ta#S37816314	303269	0.97	92	*	232	141	-	1	7e-06
	gnl|UG|Ta#S37816314	140484	1	505	*	573	482	-	414	0.002
	gnl|UG|Ta#S37816314	305846	0.97	571	*	645	73	-	147	0.002
	gnl|UG|Ta#S37816314	299184	0.97	632	*	772	179	-	40	2e-06
2	gnl|UG|Ta#S37822251	284475	0.98	2	*	132	537	-	667	9e-06
	gnl|UG|Ta#S37822251	33578	0.99	405	*	603	1223	-	1024	3e-10
2	gnl|UG|Ta#S37826238	176647	0.99	1	*	309	875	-	1183	3e-16
	gnl|UG|Ta#S37826238	48589	0.98	477	*	551	1028	-	1102	0.003
2	gnl|UG|Ta#S37826249	42211	0.98	1	-	53	133	-	81	0.05
	gnl|UG|Ta#S37826249	45676	0.97	58	-	168	608	-	718	0.0006
	gnl|UG|Ta#S37826249	45676	0.97	164	-	258	798	-	892	0.0001
	gnl|UG|Ta#S37826249	45676	0.97	258	-	349	2046	-	2136	0.002
2	gnl|UG|Ta#S37828428	175260	1	16	*	193	178	-	1	4e-09
	gnl|UG|Ta#S37828428	175261	0.98	353	*	727	449	-	77	00:00:00
2	gnl|UG|Ta#S37828930	52595	0.99	311	-	569	1	-	259	1e-13
	gnl|UG|Ta#S37828930	236054	0.98	569	-	653	709	-	625	0.008
3	gnl|UG|Ta#S37831020	188781	1	1	*	100	166	-	67	0.0006
	gnl|UG|Ta#S37831020	72285	0.99	184	*	408	224	-	1	3e-11
	gnl|UG|Ta#S37831020	188780	1	409	-	518	193	-	84	2e-05
2	gnl|UG|Ta#S37831414	186238	1	283	*	343	314	-	254	0.03
	gnl|UG|Ta#S37831414	114160	0.98	389	*	577	876	-	1064	5e-09
2	gnl|UG|Ta#S37833438	187547	0.97	88	*	281	331	-	524	2e-09
	gnl|UG|Ta#S37833438	44882	0.98	593	*	680	500	-	413	0.002
2	gnl|UG|Ta#S37834405	198484	1	1	-	568	142	-	709	00:00:00
	gnl|UG|Ta#S37834405	48365	1	569	-	726	1	-	158	5e-08
2	gnl|UG|Ta#S37842661	152171	0.97	389	*	505	197	-	81	3e-05
	gnl|UG|Ta#S37842661	7135	1	598	*	716	544	-	426	2e-05
2	gnl|UG|Ta#S37844177	124071	0.97	446	-	530	193	-	109	0.004
	gnl|UG|Ta#S37844177	124068	1	527	-	585	237	-	179	0.05
3	gnl|UG|Ta#S37854649	52430	0.98	307	*	374	1	-	68	0.02
	gnl|UG|Ta#S37854649	184243	0.97	405	*	570	266	-	101	8e-07
	gnl|UG|Ta#S37854649	184242	1	567	-	620	317	-	264	0.03
2	gnl|UG|Ta#S37856040	54041	1	460	-	569	51	-	160	2e-05
	gnl|UG|Ta#S37856040	54041	1	569	*	632	615	-	678	0.09
	gnl|UG|Ta#S37856040	19471	1	642	*	725	191	-	108	0.007
	gnl|UG|Ta#S37856040	19471	1	642	*	725	191	-	108	0.007
2	gnl|UG|Ta#S37856355	65872	0.98	1	*	166	163	-	1	2e-07
	gnl|UG|Ta#S37856355	24982	1	307	*	416	675	-	566	2e-05
	gnl|UG|Ta#S37856355	24982	1	416	-	536	477	-	357	2e-05
2	gnl|UG|Ta#S37861690	177280	1	501	*	643	101	-	243	1e-07
	gnl|UG|Ta#S37861690	177279	0.97	686	*	827	822	-	680	3e-06
2	gnl|UG|Ta#S37865687	2602	0.99	1	-	245	450	-	205	9e-12
	gnl|UG|Ta#S37865687	2602	0.99	244	*	350	107	-	1	1e-05
	gnl|UG|Ta#S37865687	14840	1	472	*	543	972	-	901	0.002
2	gnl|UG|Ta#S37865725	23482	0.99	1	*	236	447	-	212	5e-12
	gnl|UG|Ta#S37865725	21333	1	544	*	733	1	-	190	8e-09
2	gnl|UG|Ta#S37866817	286444	0.98	1	-	135	100	-	232	1e-06
	gnl|UG|Ta#S37866817	60036	0.99	136	-	415	1	-	279	7e-14
2	gnl|UG|Ta#S37870814	159336	0.99	1	-	205	108	-	311	4e-10
	gnl|UG|Ta#S37870814	159335	0.99	206	-	496	447	-	158	6e-15
2	gnl|UG|Ta#S37870834	217040	1	1	-	174	174	-	1	6e-08
	gnl|UG|Ta#S37870834	105733	0.99	175	-	706	547	-	17	00:00:00
2	gnl|UG|Ta#S37882081	36181	0.97	3	*	193	1516	-	1706	6e-09
	gnl|UG|Ta#S37882081	36181	0.97	3	*	193	1516	-	1706	6e-09
	gnl|UG|Ta#S37882081	149689	0.98	690	*	771	1	-	83	0.004
2	gnl|UG|Ta#S37884781	178142	1	1	-	457	457	-	1	00:00:00
	gnl|UG|Ta#S37884781	178143	1	458	-	660	203	-	1	6e-10
4	gnl|UG|Ta#S37885408	69715	1	62	-	212	1	-	151	4e-07
	gnl|UG|Ta#S37885408	186567	1	211	*	279	437	-	369	0.002
	gnl|UG|Ta#S37885408	42549	1	394	*	454	61	-	1	0.05
	gnl|UG|Ta#S37885408	194790	1	466	*	539	36	-	109	0.003
	gnl|UG|Ta#S37885408	194790	0.97	537	-	644	201	-	311	0.0001
	gnl|UG|Ta#S37885408	194790	1	642	-	695	397	-	450	0.04
2	gnl|UG|Ta#S37886471	221851	0.98	19	-	282	755	-	489	2e-13
	gnl|UG|Ta#S37886471	153702	1	280	-	368	210	-	122	0.0001
2	gnl|UG|Ta#S37887926	19079	1	1	*	278	278	-	1	9e-14
	gnl|UG|Ta#S37887926	118084	1	637	*	709	1	-	73	0.008
2	gnl|UG|Ta#S37890280	338667	1	1	-	150	150	-	1	1e-07
	gnl|UG|Ta#S37890280	242555	1	151	-	526	376	-	1	00:00:00
3	gnl|UG|Ta#S37905126	9940	0.97	13	*	143	317	-	444	6e-05
	gnl|UG|Ta#S37905126	9940	0.97	13	*	143	317	-	444	6e-05
	gnl|UG|Ta#S37905126	152491	0.98	128	*	407	1	-	280	6e-14
	gnl|UG|Ta#S37905126	131551	0.99	408	-	641	1	-	233	5e-11
2	gnl|UG|Ta#S37908316	9408	1	1	-	588	318	-	905	00:00:00
	gnl|UG|Ta#S37908316	286835	1	593	-	650	1	-	58	0.02
3	gnl|UG|Ta#S37910098	156105	0.97	1	-	193	194	-	1	7e-09
	gnl|UG|Ta#S37910098	156104	0.98	194	*	268	143	-	69	0.003
	gnl|UG|Ta#S37910098	210403	0.97	589	*	670	1	-	83	0.002
	gnl|UG|Ta#S37910098	210403	0.97	589	*	670	1	-	83	0.002
2	gnl|UG|Ta#S37910429	56157	1	1	-	189	189	-	1	1e-09
	gnl|UG|Ta#S37910429	20759	1	190	-	372	415	-	233	3e-09
2	gnl|UG|Ta#S37916654	298481	1	1	-	99	99	-	1	0.0003
	gnl|UG|Ta#S37916654	126091	1	100	-	213	114	-	1	1e-05
3	gnl|UG|Ta#S37921087	66529	0.97	1	-	106	107	-	1	0.0004
	gnl|UG|Ta#S37921087	55475	0.98	107	-	209	439	-	337	0.0004
	gnl|UG|Ta#S37921087	208391	0.98	215	-	612	1	-	398	00:00:00
2	gnl|UG|Ta#S37921653	32233	1	1	*	199	1075	-	877	8e-10
	gnl|UG|Ta#S37921653	133575	0.99	262	*	756	1144	-	650	00:00:00
3	gnl|UG|Ta#S37922168	73872	1	400	-	460	107	-	167	0.05
	gnl|UG|Ta#S37922168	73872	1	460	-	520	425	-	485	0.05
	gnl|UG|Ta#S37922168	186019	1	521	-	593	1762	-	1690	0.001
	gnl|UG|Ta#S37922168	186019	1	591	-	670	765	-	686	0.001
	gnl|UG|Ta#S37922168	186019	1	667	-	728	304	-	243	0.01
	gnl|UG|Ta#S37922168	186019	0.98	727	-	788	111	-	50	0.07
	gnl|UG|Ta#S37922168	186020	0.98	780	-	839	56	-	115	0.09
	gnl|UG|Ta#S37922168	186020	0.97	838	-	930	187	-	280	0.0005
2	gnl|UG|Ta#S37923025	198163	0.99	1	*	102	1151	-	1252	0.0003
	gnl|UG|Ta#S37923025	198163	0.97	115	*	364	1230	-	1480	4e-12
	gnl|UG|Ta#S37923025	49411	0.98	596	*	745	1	-	150	1e-07
2	gnl|UG|Ta#S37923199	133166	0.97	460	*	531	907	-	978	0.07
	gnl|UG|Ta#S37923199	189060	0.98	575	*	754	1	-	179	2e-08
2	gnl|UG|Ta#S37923649	52859	0.97	298	-	410	427	-	315	5e-05
	gnl|UG|Ta#S37923649	52859	1	410	*	494	216	-	132	0.002
	gnl|UG|Ta#S37923649	342286	0.98	583	*	649	216	-	150	0.09
2	gnl|UG|Ta#S37925020	155343	0.98	46	*	153	107	-	1	0.0002
	gnl|UG|Ta#S37925020	75432	0.98	236	*	343	233	-	126	0.0002
2	gnl|UG|Ta#S37927429	145378	0.98	135	*	305	447	-	277	2e-08
	gnl|UG|Ta#S37927429	145367	0.97	521	*	608	1	-	88	0.005
2	gnl|UG|Ta#S37927775	181414	0.98	226	*	304	1	-	79	0.002
	gnl|UG|Ta#S37927775	181412	0.98	533	*	662	239	-	369	4e-06
2	gnl|UG|Ta#S37928763	201008	0.97	337	*	459	157	-	35	2e-05
	gnl|UG|Ta#S37928763	24021	0.98	652	*	725	1055	-	1128	0.001
3	gnl|UG|Ta#S37929303	209778	0.98	1	-	60	195	-	253	0.03
	gnl|UG|Ta#S37929303	38894	1	58	-	155	472	-	375	0.0001
	gnl|UG|Ta#S37929303	38894	0.98	153	-	305	279	-	127	8e-07
	gnl|UG|Ta#S37929303	172167	0.98	303	-	417	546	-	432	1e-05
4	gnl|UG|Ta#S37934875	52607	1	1	-	82	1181	-	1262	0.009
	gnl|UG|Ta#S37934875	54814	0.98	86	*	169	743	-	660	0.009
	gnl|UG|Ta#S37934875	67286	0.98	264	*	549	975	-	690	8e-14
	gnl|UG|Ta#S37934875	193225	0.98	548	-	795	525	-	776	2e-12
2	gnl|UG|Ta#S37937223	192402	1	1	*	94	94	-	1	0.0002
	gnl|UG|Ta#S37937223	192401	0.98	114	*	274	435	-	275	1e-07
	gnl|UG|Ta#S37937223	192401	0.99	273	-	384	112	-	1	8e-05
3	gnl|UG|Ta#S37942664	174971	0.98	1	*	134	133	-	1	1e-06
	gnl|UG|Ta#S37942664	73260	0.98	200	*	592	1	-	393	00:00:00
	gnl|UG|Ta#S37942664	73260	1	591	*	663	480	-	552	0.001
	gnl|UG|Ta#S37942664	174973	1	735	*	836	1	-	102	0.0008
3	gnl|UG|Ta#S37942938	59989	1	239	*	407	1	-	169	4e-08
	gnl|UG|Ta#S37942938	32639	1	358	*	417	723	-	782	0.02
	gnl|UG|Ta#S37942938	145994	0.98	581	*	776	1	-	196	6e-09
2	gnl|UG|Ta#S37943157	32639	0.98	349	-	777	46	-	473	00:00:00
	gnl|UG|Ta#S37943157	70504	1	775	-	876	474	-	373	0.0008
2	gnl|UG|Ta#S37943607	223921	0.99	1	-	387	563	-	176	00:00:00
	gnl|UG|Ta#S37943607	223921	0.97	385	*	468	86	-	1	0.004
	gnl|UG|Ta#S37943607	39501	0.98	666	*	746	379	-	299	0.002
	gnl|UG|Ta#S37943607	39501	0.97	745	-	811	209	-	141	0.01
3	gnl|UG|Ta#S37945954	188857	0.98	117	-	167	110	-	60	0.2
	gnl|UG|Ta#S37945954	188858	1	166	-	242	977	-	901	0.005
	gnl|UG|Ta#S37945954	188858	0.98	241	-	307	814	-	748	0.09
	gnl|UG|Ta#S37945954	188858	1	307	-	360	354	-	301	0.03
	gnl|UG|Ta#S37945954	188858	1	361	-	496	197	-	62	8e-06
	gnl|UG|Ta#S37945954	25126	1	489	-	554	726	-	661	0.07
	gnl|UG|Ta#S37945954	25126	1	555	-	634	555	-	476	0.001
2	gnl|UG|Ta#S37947033	120018	1	1	*	167	288	-	122	5e-08
	gnl|UG|Ta#S37947033	9918	0.99	289	*	447	1064	-	906	2e-07
	gnl|UG|Ta#S37947033	9918	0.98	448	-	736	820	-	532	3e-14
2	gnl|UG|Ta#S37947987	161048	0.99	2	-	139	216	-	354	3e-06
	gnl|UG|Ta#S37947987	161050	0.98	140	-	619	480	-	1	00:00:00
3	gnl|UG|Ta#S37960449	182640	1	111	*	261	151	-	1	7e-07
	gnl|UG|Ta#S37960449	55787	0.98	568	*	642	1	-	75	0.006
	gnl|UG|Ta#S37960449	62821	1	641	-	698	667	-	724	0.04
	gnl|UG|Ta#S37960449	62821	1	694	-	809	1647	-	1762	2e-05
4	gnl|UG|Ta#S37965574	30357	1	130	-	258	1346	-	1218	1e-06
	gnl|UG|Ta#S37965574	30357	1	256	-	325	1137	-	1068	0.009
	gnl|UG|Ta#S37965574	30357	1	323	-	435	735	-	623	1e-05
	gnl|UG|Ta#S37965574	30357	1	434	*	496	245	-	183	0.07
	gnl|UG|Ta#S37965574	50911	1	636	*	698	399	-	337	0.07
	gnl|UG|Ta#S37965574	91555	1	743	*	822	97	-	18	0.002
	gnl|UG|Ta#S37965574	43018	1	823	-	988	106	-	271	4e-08
	gnl|UG|Ta#S37965574	43018	1	988	-	1212	349	-	573	6e-11
	gnl|UG|Ta#S37965574	43018	1	1211	-	1292	681	-	762	0.002
	gnl|UG|Ta#S37965574	43018	0.98	1291	-	1454	963	-	1126	8e-08
	gnl|UG|Ta#S37965574	43018	1	1449	-	1562	1392	-	1505	3e-05
	gnl|UG|Ta#S37965574	43018	1	1559	-	1620	1762	-	1823	0.03
3	gnl|UG|Ta#S38479081	164705	0.98	169	-	285	853	-	737	1e-05
	gnl|UG|Ta#S38479081	164705	0.99	283	-	458	649	-	474	5e-08
	gnl|UG|Ta#S38479081	164705	0.97	455	*	550	322	-	227	0.0006
	gnl|UG|Ta#S38479081	193049	1	783	*	896	29	-	142	3e-05
	gnl|UG|Ta#S38479081	63644	0.98	968	*	1050	1588	-	1506	0.002
	gnl|UG|Ta#S38479081	63644	0.97	1048	-	1137	1101	-	1012	0.001
	gnl|UG|Ta#S38479081	63644	0.99	1136	-	1243	783	-	676	3e-05
	gnl|UG|Ta#S38479081	63644	1	1241	-	1349	585	-	477	2e-05
2	gnl|UG|Ta#S38497470	159429	1	9	*	69	1132	-	1192	0.06
	gnl|UG|Ta#S38497470	133353	1	1023	*	1102	1	-	80	0.002
4	gnl|UG|Ta#S41505276	147915	0.99	1	*	325	325	-	1	1e-16
	gnl|UG|Ta#S41505276	300215	0.97	370	*	734	364	-	1	1e-17
	gnl|UG|Ta#S41505276	165686	0.98	735	-	811	334	-	258	0.004
	gnl|UG|Ta#S41505276	147912	0.99	808	-	1102	3	-	297	1e-15
2	gnl|UG|Ta#S41658063	28025	1	1	*	399	168	-	566	00:00:00
	gnl|UG|Ta#S41658063	32459	1	477	*	544	1079	-	1012	0.009
	gnl|UG|Ta#S41658063	32459	1	542	-	643	911	-	810	0.0001
	gnl|UG|Ta#S41658063	32459	0.98	642	-	690	676	-	627	0.1
3	gnl|UG|Ta#S43837843	77466	0.98	603	*	782	343	-	164	3e-08
	gnl|UG|Ta#S43837843	36310	0.97	1057	*	1330	1419	-	1146	2e-13
	gnl|UG|Ta#S43837843	36310	0.97	1447	*	1895	810	-	362	00:00:00
	gnl|UG|Ta#S43837843	150598	0.99	2053	*	2179	1	-	127	2e-06
	gnl|UG|Ta#S43837843	150598	0.98	2413	*	2491	740	-	818	0.009
	gnl|UG|Ta#S43837843	150598	0.97	2484	-	2678	1019	-	1212	1e-09
	gnl|UG|Ta#S43837843	150598	0.98	2677	-	2879	1335	-	1537	2e-09
2	gnl|UG|Ta#S43837853	126562	0.97	1004	-	1164	463	-	303	1e-07
	gnl|UG|Ta#S43837853	126562	0.97	1164	*	1245	82	-	1	0.006
	gnl|UG|Ta#S43837853	20749	0.98	1610	*	1683	1	-	74	0.003
3	gnl|UG|Ta#S46925412	18023	0.99	1	*	100	163	-	64	0.0006
	gnl|UG|Ta#S46925412	49772	0.98	356	*	412	126	-	182	0.04
	gnl|UG|Ta#S46925412	49772	1	451	*	515	577	-	641	0.03
	gnl|UG|Ta#S46925412	49772	1	516	*	582	743	-	809	0.03
	gnl|UG|Ta#S46925412	168163	1	755	*	823	488	-	420	0.002
	gnl|UG|Ta#S46925412	168163	0.98	822	-	990	332	-	164	1e-08
2	gnl|UG|Ta#S46933443	179282	1	273	*	402	488	-	359	2e-06
	gnl|UG|Ta#S46933443	179283	0.98	452	*	527	12	-	87	0.001
3	gnl|UG|Ta#S49954756	41564	0.98	443	-	496	307	-	254	0.03
	gnl|UG|Ta#S49954756	41564	1	494	-	616	155	-	33	3e-06
	gnl|UG|Ta#S49954756	152339	0.98	615	*	730	625	-	510	5e-05
	gnl|UG|Ta#S49954756	44189	0.97	835	*	976	1	-	142	4e-06
5	gnl|UG|Ta#S50380458	45311	0.99	1	-	129	695	-	823	3e-06
	gnl|UG|Ta#S50380458	110928	0.99	130	-	320	1	-	191	1e-09
	gnl|UG|Ta#S50380458	105946	0.98	321	-	446	1	-	126	7e-05
	gnl|UG|Ta#S50380458	105946	1	444	-	572	306	-	434	7e-06
	gnl|UG|Ta#S50380458	112864	0.99	572	-	713	1	-	142	2e-06
2	gnl|UG|Ta#S50381052	266720	0.98	376	-	463	156	-	69	0.002
	gnl|UG|Ta#S50381052	223270	1	457	-	623	167	-	1	5e-08
2	gnl|UG|Ta#S50382868	153390	0.98	173	-	293	121	-	1	4e-05
	gnl|UG|Ta#S50382868	274474	0.97	294	-	682	389	-	1	00:00:00
3	gnl|UG|Ta#S50383418	153927	0.98	15	-	165	676	-	826	9e-07
	gnl|UG|Ta#S50383418	153927	0.99	163	-	277	893	-	1007	2e-05
	gnl|UG|Ta#S50383418	153927	0.98	274	*	414	1114	-	1254	3e-06
	gnl|UG|Ta#S50383418	153926	1	523	*	594	96	-	25	0.003
	gnl|UG|Ta#S50383418	153930	0.98	718	*	769	84	-	134	0.7
2	gnl|UG|Ta#S50384651	48108	1	16	-	245	274	-	45	5e-12
	gnl|UG|Ta#S50384651	63962	0.99	241	-	480	93	-	331	1e-12
2	gnl|UG|Ta#S50387248	4117	1	1	*	181	184	-	4	8e-09
	gnl|UG|Ta#S50387248	284865	0.99	574	*	704	1271	-	1141	2e-06
2	gnl|UG|Ta#S50387302	102849	1	261	-	350	1	-	90	0.0003
	gnl|UG|Ta#S50387302	102849	0.98	347	*	434	181	-	268	0.002
	gnl|UG|Ta#S50387302	56440	1	652	*	726	1	-	75	0.007
2	gnl|UG|Ta#S50387896	204355	0.98	38	*	205	3	-	172	8e-08
	gnl|UG|Ta#S50387896	204356	0.99	301	*	531	1	-	231	6e-11
2	gnl|UG|Ta#S50388548	171772	0.99	103	-	246	173	-	30	1e-07
	gnl|UG|Ta#S50388548	171773	1	244	-	311	424	-	491	0.005
2	gnl|UG|Ta#S50388729	213071	0.98	178	*	314	1	-	137	5e-06
	gnl|UG|Ta#S50388729	134389	0.98	332	*	644	1	-	313	7e-15
2	gnl|UG|Ta#S50389065	137294	0.97	16	*	83	68	-	1	0.01
	gnl|UG|Ta#S50389065	17333	0.98	453	*	533	634	-	714	0.001
